# Supplementary material for: Regulation of microtubule dynamic instability by the carboxy-terminal tail of β-tubulin
Source: Life Sci Alliance. 2018 Apr 19;1(2):e201800054. doi: 10.26508/lsa.201800054 (PMC6022761; doi:10.26508/lsa.201800054)
Supplement: Supplementary file 1 [file LSA-2018-00054_TableS1.xlsx]

## Sheet: PeptideGroups
Checked	Confidence	Sequence			Modifications	# Protein Groups	# Proteins	# PSMs	Master Protein Accessions	# Missed Cleavages	Theo. MH+ [Da]	# Razor Quan Results	SF5	SF4	SF1	Quan Info	SF5	SF4	SF1	Confidence (by Search Engine): A Mascot	Ions Score (by Search Engine): A Mascot	Top Apex RT [min]
FALSE	High	AADDFR	R			7	14	1	sp; IPI00000012.1; IPI00000011.1; sp; IPI00000009.1; sp; IPI00000013.1	0	694.315	0				Shared	Not Found	Not Found	Not Found	High	22	12.54
FALSE	High	AAFGGSGGR	R			2	2	11	IPI00000008.1; sp	0	779.379	0	1.01524e+06	1.04873e+06	327696	Shared	High	High	High	High	41	11.18
FALSE	High	AAIAAIK	K			1	2	6	F2Z5S8	0	657.429	0	284662	792679	1.80618e+06		High	High	High	High	39	18.71
FALSE	High	AAIADAEQR	R			2	2	1	IPI00000005.1; IPI00000002.1	0	944.48	0				Shared	Not Found	Not Found	Not Found	High	34	13.8
FALSE	High	AAIATIK	K			4	11	8	F1RK98; P02550; F1SHC1; F1MNF8	0	687.44	0	709722	3.03457e+06	20318815	Shared	High	High	High	High	38	18.09
FALSE	High	AAPGVDLTQLLNNMR	R		1xOxidation [M14]	1	2	6	IPI00000012.1	0	1628.84	0	1.86611e+06				High	High	Not Found	High	69	43.74
FALSE	High	AAPGVDLTQLLNNMR	R			1	2	4	IPI00000012.1	0	1612.85	0	193948	301747			High	High	Not Found	High	82	51.93
FALSE	High	ACCLLYR	R		2xCarbamidomethyl [C2; C3]	6	13	3	G5E6J5; P02550; F1SHC1; F1MNF8; F1RYV9; F2Z5S8	0	955.449	0		291323	1.02325e+06	Shared	Not Found	Peak Found	High	High	38	25.7
FALSE	High	ACFAVEGPK	K		1xCarbamidomethyl [C2]	1	1	1	sp	0	978.471	0	142952	282584			Peak Found	High	Not Found	High	20	24.01
FALSE	High	ACFEPANQMVK	K		1xCarbamidomethyl [C2]; 1xOxidation [M9]	5	14	7	F1RK98; P02550; F1SHC1; F1MNF8; F2Z5S8	0	1310.59	0		1705869	2397043	Shared	Not Found	High	High	High	34	21.09
FALSE	High	ACFEPANQMVK	K		1xCarbamidomethyl [C2]	5	14	6	F1RK98; P02550; F1SHC1; F1MNF8; F2Z5S8	0	1294.59	0	1.12777e+06	6.77692e+06	3.39698e+07	Shared	High	Peak Found	High	High	41	27.78
FALSE	High	ACWELYCLEHGIQPDGQMPSDK	K		2xCarbamidomethyl [C2; C7]; 1xOxidation [M18]	6	15	16	F1RK98; P02550; A7E1S5; F1SHC1; F1MNF8; F2Z5S8	0	2650.14	0	5.45148e+06	1.35612e+07	4.06385e+07	Shared	High	High	High	High	76	42.23
FALSE	High	ACWELYCLEHGIQPDGQMPSDK	K		2xCarbamidomethyl [C2; C7]	6	15	1	F1RK98; P02550; A7E1S5; F1SHC1; F1MNF8; F2Z5S8	0	2634.14	0				Shared	Not Found	Not Found	Not Found	High	75	43.8
FALSE	High	ADLEMQIESLK	K		1xOxidation [M5]	1	1	5	IPI00000011.1	0	1292.64	0	260493	429120			High	High	Not Found	High	66	39.08
FALSE	High	ADLEMQIESLKEELAYLK	K		1xOxidation [M5]	1	1	9	IPI00000011.1	1	2139.09	0	1.09459e+06	2.26372e+06			High	High	Not Found	High	93	56.24
FALSE	High	ADLEMQIESLTEELAY	Y		1xOxidation [M5]	1	2	1	IPI00000012.1	0	1870.86	0				No Quan Values	Not Found	Not Found	Not Found	High	19
FALSE	High	ADLEMQIESLTEELAYLK	K		1xOxidation [M5]	1	2	11	IPI00000012.1	0	2112.04	0	19331446				High	High	High	High	105	58.77
FALSE	High	ADLEMQIESLTEELAYLK	K			1	2	1	IPI00000012.1	0	2096.05	0				No Quan Values	Not Found	Not Found	Not Found	High	87
FALSE	High	ADLEMQIESLTEELAYLKK	K		1xOxidation [M5]	1	2	10	IPI00000012.1	1	2240.14	0	21430370	1.48403e+07	3.03169e+06		High	High	High	High	93	58.37
FALSE	High	ADTLTDEINFLR	R			1	1	6	IPI00000005.1	0	1407.71	0	4.94806e+06	8864855	1.91093e+06		High	High	High	High	74	46.16
FALSE	High	AEAEALYQTK	K			2	2	6	IPI00000006.1; IPI00000004.1	0	1123.56	0	1.66867e+06	816189	291303	Shared	High	High	High	High	44	20.66
FALSE	High	AEAESL	L			2	3	1	sp; IPI00000001.1	0	619.293	0				Shared	Not Found	Not Found	Not Found	High	21	16.02
FALSE	High	AEAESLY	Y			2	3	1	sp; IPI00000001.1	0	782.357	0	137486	136982		Shared	Peak Found	Peak Found	Not Found	High	20	24.61
FALSE	High	AEAESLYQSK	K			2	3	19	sp; IPI00000001.1	0	1125.54	0	4.83053e+07	8.46977e+07	18472040	Shared	High	High	High	High	57	18.82
FALSE	High	AEAESLYQSKYEELQITAGR	R			2	3	6	sp; IPI00000001.1	1	2286.12	0	272818		332997	Shared	Peak Found	High	High	High	113	36.52
FALSE	High	AEAESWYQTK	K			1	1	7	IPI00000005.1	0	1212.55	0	2131438	3.05272e+06	906677		High	High	High	High	44	24.54
FALSE	High	AEFAEVSK	K			1	1	5	sp	0	880.441	0	280426				Peak Found	High	Not Found	High	37	19.05
FALSE	High	AEIENIK	K			1	1	1	IPI00000004.1	0	816.446	0	697058		102929		High	Not Found	Peak Found	High	19	17.92
FALSE	High	AEIENIKK	K			1	1	1	IPI00000004.1	1	944.541	0	639089		95851.8		High	Not Found	Peak Found	High	25	14.3
FALSE	High	AELVDSVLDVVR	R			6	12	2	E1BJB1; F1S6M7; Q2HJ81; Q767L7; F2Z571; F2Z5B2	0	1314.73	0				No Quan Values	Not Found	Not Found	High	High	60
FALSE	High	AENEFVTIK	K			4	5	6	IPI00000006.1; sp; IPI00000001.1; IPI00000005.1	0	1050.55	0	188742			Shared	Peak Found	High	Not Found	High	34	29.02
FALSE	High	AETECQNTEYQQLLDIK	K		1xCarbamidomethyl [C5]	1	2	12	IPI00000012.1	0	2082.96	0	5.66405e+06	5.16247e+06	1.44923e+06		High	High	Peak Found	High	108	40.29
FALSE	High	AFLHWYTGEGMD	D		1xOxidation [M11]	6	8	2	E1BJB1; F2Z5K5; F1S6M7; Q767L7; F2Z571; F2Z5B2	0	1442.6	0				Shared	High	Not Found	Not Found	High	41	40.38
FALSE	High	AFLHWYTGEGMDEME	E		2xOxidation [M11; M14]	6	8	1	E1BJB1; F2Z5K5; F1S6M7; Q767L7; F2Z571; F2Z5B2	0	1847.73	0	3.52582e+06	1301883		Shared	High	Peak Found	Not Found	High	69	39.84
FALSE	High	AFLHWYTGEGMDEMEFTEAE	E		2xOxidation [M11; M14]	6	8	2	E1BJB1; F2Z5K5; F1S6M7; Q767L7; F2Z571; F2Z5B2	0	2424.96	0	882344			Shared	High	High	Not Found	High	66	44.44
FALSE	High	AFLHWYTGEGMDEMEFTEAESNMNDLVSEYQQYQDATADEQ	Q		3xOxidation [M11; M14; M23]	2	3	1	E1BJB1; F2Z5B2	0	4870.95	0				No Quan Values	Not Found	Not Found	Not Found	High	17
FALSE	High	AFVHWYVGEGME	E		1xOxidation [M11]	7	16	2	F1RK98; Q2HJB8; I3LDR2; P02550; F1SHC1; F1MNF8; F2Z5S8	0	1440.63	0	185182			Shared	High	Not Found	Not Found	High	44	39.14
FALSE	High	AFVHWYVGEGMEE	E		1xOxidation [M11]	7	16	4	F1RK98; Q2HJB8; I3LDR2; P02550; F1SHC1; F1MNF8; F2Z5S8	0	1569.67	0	2.49023e+06	857292		Shared	High	High	Not Found	High	53	39.04
FALSE	High	AFVHWYVGEGMEEGEFSEAR	R		1xOxidation [M11]	7	16	289	F1RK98; Q2HJB8; I3LDR2; P02550; F1SHC1; F1MNF8; F2Z5S8	0	2346.01	0	3.43595e+07	1.37696e+08	1.86216e+08	Shared	High	High	High	High	98	39.89
FALSE	High	AFVHWYVGEGMEEGEFSEAR	R			7	16	71	F1RK98; Q2HJB8; I3LDR2; P02550; F1SHC1; F1MNF8; F2Z5S8	0	2330.02	0		3.76786e+06	6.71726e+07	Shared	Not Found	High	High	High	80	43.32
FALSE	High	AFVHWYVGEGMEEGEFSEARE	E		1xOxidation [M11]	7	16	1	F1RK98; Q2HJB8; I3LDR2; P02550; F1SHC1; F1MNF8; F2Z5S8	1	2475.06	0	477907	669160		Shared	High	Peak Found	Not Found	High	72	40.15
FALSE	High	AFVHWYVGEGMEEGEFSEAREDMAALEK	K		2xOxidation [M11; M23]	4	10	7	P02550; F1SHC1; F1MNF8; F2Z5S8	1	3249.41	0		3.77699e+06		Shared	Not Found	High	High	High	36	41.4
FALSE	High	AFVHWYVGEGMEEGEFSEAREDMAALEK	K		1xOxidation [M11]	4	10	1	P02550; F1SHC1; F1MNF8; F2Z5S8	1	3233.42	0			408717	Shared	Not Found	Not Found	Peak Found	High	39	46.48
FALSE	High	AFVHWYVGEGMEEGEFSEAREDMAALEK	K			4	10	1	P02550; F1SHC1; F1MNF8; F2Z5S8	1	3217.42	0				No Quan Values	Not Found	Not Found	Not Found	High	44
FALSE	High	AGEYGAEALER	R			1	1	1	sp	0	1165.55	0		178633			Not Found	High	Not Found	High	20	23.98
FALSE	High	AGGDGLLVGSEK	K			2	2	1	IPI00000011.1; IPI00000013.1	0	1102.57	0				Shared	Not Found	Not Found	Not Found	High	57	24.75
FALSE	High	AGVQIGNACWELYCLEHGIQPDGQMPSDK	K		2xCarbamidomethyl [C9; C14]; 1xOxidation [M25]	5	14	2	F1RK98; P02550; A7E1S5; F1SHC1; F1MNF8	0	3289.47	0			847951	Shared	Not Found	High	High	High	33	47.82
FALSE	High	AIADAEQR	R			4	4	2	IPI00000008.1; IPI00000005.1; sp; IPI00000002.1	0	873.442	0	123071	181629		Shared	Peak Found	Peak Found	Not Found	High	33	11.26
FALSE	High	AIAEAWAR	R			7	15	7	F1RK98; Q2HJB8; I3LDR2; P02550; F1SHC1; F1MNF8; F2Z5S8	0	887.473	0	946055	1.51136e+06	4473830	Shared	Peak Found	Peak Found	High	High	34	25.85
FALSE	High	AIGGGLSSVGGGSSTIK	K			1	1	7	IPI00000005.1	0	1447.78	0	2.01535e+06	3.03396e+06	987061		High	High	High	High	95	28.99
FALSE	High	AILVDLEPGTMDSVR	R	1	1xOxidation [M11]	4	9	220	E1BJB1; F1S6M7; Q767L7; F2Z5B2	0	1631.83	0	5.34664e+08	6.17656e+08	7.14755e+08	Shared	High	High	High	High	71	38.59
FALSE	High	AILVDLEPGTMDSVR	R			4	9	49	E1BJB1; F1S6M7; Q767L7; F2Z5B2	0	1615.84	0	3.34929e+07	8.63822e+07	3.27328e+08	Shared	High	High	High	High	104	43.15
FALSE	High	AIQELFK	K			8	11	10	E1BJB1; F2Z5K5; F1S6M7; I3LBV1; Q2HJ81; Q767L7; F2Z571; F2Z5B2	0	848.488	0	3800919	3.82956e+06	11916289	Shared	High	High	High	High	32	32.75
FALSE	High	AISGGYGSR	R			1	1	1	IPI00000005.1	0	867.432	0		73709.3			Not Found	Peak Found	Not Found	High	34	13.25
FALSE	High	ALEEANADLEVK	K			3	3	28	IPI00000011.1; sp; IPI00000013.1	0	1301.66	0	1.38818e+07	1.30195e+07	4.27173e+06	Shared	High	High	High	High	81	27.47
FALSE	High	ALEEQLQQIR	R			1	2	6	IPI00000012.1	0	1227.67	0	1.38162e+06	1.70767e+06			High	High	Not Found	High	50	31.08
FALSE	High	ALEESNYELEGK	K			1	2	24	IPI00000012.1	0	1381.65	0	70056918	73933542	1.98902e+07		High	High	High	High	78	25.41
FALSE	High	ALNEINQFYQK	K			1	1	1	sp	0	1367.7	0				No Quan Values	Not Found	Not Found	Not Found	High	36
FALSE	High	ALNVDLTEFQTNLVPYPR	R			7	17	2	F1RK98; Q2HJB8; I3LDR2; P02550; F1SHC1; F1MNF8; F2Z5S8	0	2090.09	0				No Quan Values	Not Found	Not Found	High	High	92
FALSE	High	ALTVAELTQQMFDAR	R			2	2	1	A5GFX6; E1BJK2	0	1693.86	0				Shared	Not Found	Not Found	Not Found	High	80	52.88
FALSE	High	ALTVPELTQQ	Q			8	14	1	E1BJB1; F2Z5K5; F1S6M7; I3LBV1; Q2HJ81; Q767L7; F2Z571; F2Z5B2	0	1099.6	0	234813	302813	970088	Shared	Peak Found	Peak Found	Peak Found	High	17	37.43
FALSE	High	ALTVPELTQQMFDAK	K		1xOxidation [M11]	5	8	195	F2Z5K5; F1S6M7; I3LBV1; Q2HJ81; F2Z571	0	1707.86	4	2.17978e+08	2.73763e+08	3.26331e+08	Shared	High	High	High	High	64	39.87
FALSE	High	ALTVPELTQQMFDAK	K			5	8	59	F2Z5K5; F1S6M7; I3LBV1; Q2HJ81; F2Z571	0	1691.87	0	5.70152e+07	8.83921e+07	2.24228e+08	Shared	High	High	High	High	67	49.15
FALSE	High	ALTVPELTQQMFDSK	K		1xOxidation [M11]	2	2	203	E1BJB1; F2Z5B2	0	1723.86	0	1.2792e+08	1.86019e+08	2.00949e+08	Shared	High	High	High	High	55	39.34
FALSE	High	ALTVPELTQQMFDSK	K			2	2	32	E1BJB1; F2Z5B2	0	1707.86	1	3643302	6.18595e+06	1.51392e+07	Shared	High	High	High	High	70	48.25
FALSE	High	ALTVPELTQQVFDAK	K			1	1	31	Q767L7	0	1659.9	0	7.99339e+06	1.37489e+07	16229097		High	High	High	High	76	48.2
FALSE	High	ALYDAELSQMQTH	H		1xOxidation [M10]	1	1	1	IPI00000005.1	0	1522.68	0					Not Found	Not Found	Not Found	High	46	28.44
FALSE	High	ALYDAELSQMQTHISDTSVVLSMDNNR	R		2xOxidation [M10; M23]	1	1	4	IPI00000005.1	0	3070.41	1	688247	941422			High	High	Not Found	High	86	37.85
FALSE	High	ALYDAELSQMQTHISDTSVVLSMDNNR	R		1xOxidation [M23]	1	1	5	IPI00000005.1	0	3054.41	0	242415	501106			High	High	Not Found	High	91	45.57
FALSE	High	AMKPWIQPK	K			1	1	2	sp	0	1098.61	0				No Quan Values	Not Found	High	Not Found	High	22
FALSE	High	ANILLQIDNAR	R			1	2	1	IPI00000012.1	0	1240.7	0					Not Found	Not Found	Not Found	High	37	39.07
FALSE	High	APSTYGGGLSVS	S			2	2	1	IPI00000011.1; IPI00000013.1	0	1095.53	0				Shared	Not Found	Not Found	Not Found	High	18	28.14
FALSE	High	APSTYGGGLSVSSR	R			1	1	7	IPI00000013.1	0	1338.66	0	983284	2.64191e+06	561972		High	High	High	High	68	24.36
FALSE	High	APSTYGGGLSVSSSR	R			1	1	11	IPI00000011.1	0	1425.7	0	3.73058e+06	5.88766e+06	1.97126e+06		High	High	High	High	90	24.15
FALSE	High	APVISAEK	K			5	14	14	F1RK98; P02550; F1SHC1; F1MNF8; F2Z5S8	0	814.467	0	563547	2.50376e+06	4.84161e+06	Shared	High	High	High	High	38	16.07
FALSE	High	APVLSDSSCK	K		1xCarbamidomethyl [C9]	1	1	7	sp	0	1063.51	0	789421	987909	1.97975e+06		High	High	High	High	71	16.1
FALSE	High	AQISALEEQLQQIR	R			1	2	3	IPI00000012.1	0	1626.88	0		339094			High	Peak Found	Not Found	High	83	43.21
FALSE	High	AQYDDIVTR	R			1	2	1	sp	0	1080.53	0					Not Found	Not Found	Not Found	High	30	24.38
FALSE	High	AQYEDIAQK	K			2	2	24	sp; IPI00000001.1	0	1065.52	0	1.03203e+08	127995615	3.63941e+07	Shared	High	High	High	High	52	18.35
FALSE	High	AQYEDIAQKSK	K			2	2	1	sp; IPI00000001.1	1	1280.65	0				No Quan Values	High	Not Found	Not Found	High	31
FALSE	High	AQYEDIAQR	R			1	1	2	IPI00000006.1	0	1093.53	0	7848345	1.03039e+07	4.16462e+06		Peak Found	Peak Found	Peak Found	High	28	19.4
FALSE	High	AQYEEIAQR	R			4	4	13	IPI00000008.1; IPI00000005.1; sp; IPI00000004.1	0	1107.54	0	5.20159e+07	3.67756e+07	1.33515e+07	Shared	High	High	High	High	60	19.72
FALSE	High	ASFIDK	K			10	12	4	IPI00000006.1; sp; IPI00000008.1; sp; IPI00000001.1; IPI00000005.1; sp; IPI00000007.1; IPI00000004.1; IPI00000002.1	0	680.361	0	1.11859e+06	1.69899e+06	253754	Shared	High	Peak Found	Peak Found	High	32	18.2
FALSE	High	ASLENSLEETK	K			2	2	9	IPI00000011.1; IPI00000013.1	0	1220.6	0	4.53046e+06	1.03579e+07	2.02354e+06	Shared	High	High	High	High	52	26.02
FALSE	High	ASLENSLEETKGR	R			2	2	5	IPI00000011.1; IPI00000013.1	1	1433.72	0	223859			Shared	High	Not Found	Not Found	High	93	23.78
FALSE	High	ASLIPTPR	R			1	2	1	F2Z562	0	854.509	0	385840	360117	390548		Peak Found	Peak Found	Peak Found	High	15	26.37
FALSE	High	ASTSTTIR	R		1xAcetyl [N-Term]	1	1	7	IPI00000005.1	0	878.458	0	2.25863e+06	4.28964e+06	1.25572e+06		High	High	High	High	46	17.08
FALSE	High	ASYLDK	K			5	7	1	IPI00000012.1; IPI00000011.1; IPI00000014.1; IPI00000010.1; IPI00000013.1	0	696.356	0				Shared	Not Found	Not Found	Not Found	High	33	14.5
FALSE	High	ATFIGNSTAIQELFK	K			6	8	5	E1BJB1; F2Z5K5; I3LBV1; Q2HJ81; F2Z571; F2Z5B2	0	1639.87	0	214084	288006	728656	Shared	High	High	High	High	69	50.79
FALSE	High	ATIENAQPILQIDNAR	R			1	1	1	IPI00000013.1	0	1766.94	0				No Quan Values	Not Found	Not Found	Not Found	High	36
FALSE	High	ATMSGVTTCLR	R		1xCarbamidomethyl [C9]	5	9	1	E1BJB1; F2Z5K5; Q767L7; F2Z571; F2Z5B2	0	1196.58	0		189409	955235	Shared	Not Found	Peak Found	High	High	46	26.53
FALSE	High	ATMSGVTTSLR	R			3	5	1	F1S6M7; I3LBV1; Q2HJ81	0	1123.58	0			728692	Shared	Not Found	Not Found	High	High	42	25.76
FALSE	High	ATYAPVISAEK	K			5	14	10	F1RK98; P02550; F1SHC1; F1MNF8; F2Z5S8	0	1149.62	0	2.70204e+06	5.66658e+06	1.61989e+07	Shared	High	High	High	High	44	25.93
FALSE	High	AVCMLSN	N		1xCarbamidomethyl [C3]; 1xOxidation [M4]	8	17	2	F1RK98; G5E6J5; Q2HJB8; P02550; F1SHC1; F1MNF8; F1RYV9; F2Z5S8	0	810.348	0	70743.9	365999	827736	Shared	Peak Found	Peak Found	High	High	27	23.84
FALSE	High	AVCMLSNTTAIAEAWAR	R		1xCarbamidomethyl [C3]; 1xOxidation [M4]	6	14	379	F1RK98; Q2HJB8; P02550; F1SHC1; F1MNF8; F2Z5S8	0	1880.9	0	9.23691e+07	212921633	2.98853e+08	Shared	High	High	High	High	156	42.47
FALSE	High	AVCMLSNTTAIAEAWAR	R		1xCarbamidomethyl [C3]	6	14	183	F1RK98; Q2HJB8; P02550; F1SHC1; F1MNF8; F2Z5S8	0	1864.9	0	1.32947e+07	6.79642e+07	1.47015e+08	Shared	High	High	High	High	121	48.61
FALSE	High	AVFVDLEPTVIDEIR	R			1	1	77	F2Z5S8	0	1715.92	0	7.66013e+07	1.41214e+08	2.4638e+08		High	High	High	High	108	50.86
FALSE	High	AVFVDLEPTVIDEVR	R			4	12	350	P02550; A7E1S5; F1SHC1; F1MNF8	0	1701.91	0	4.09887e+08	7.0503e+08	9.48877e+08	Shared	High	High	High	High	105	48.18
FALSE	High	AVLVDLEPGTMDSVR	R		1xOxidation [M11]	2	2	111	F2Z5K5; F2Z571	0	1617.82	0	1.20825e+08	1.75049e+08	1.50959e+08	Shared	High	High	High	High	84	36.57
FALSE	High	AVLVDLEPGTMDSVR	R			2	2	18	F2Z5K5; F2Z571	0	1601.82	0	9.80582e+06	3.62505e+07	1.2653e+08	Shared	High	High	High	High	84	41.06
FALSE	High	AVMVDLEPTVVDEVR	R		1xOxidation [M3]	2	3	3	Q2HJB8; I3LDR2	0	1687.86	0	2.93273e+06	501276	1.95573e+06	Shared	High	High	High	High	79	39.95
FALSE	High	AVMVDLEPTVVDEVR	R			2	3	1	Q2HJB8; I3LDR2	0	1671.86	0				Shared	Not Found	Not Found	Not Found	High	68	43.32
FALSE	High	AVNMVPFPR	R			10	16	1	A5GFX6; E1BJB1; F2Z5K5; F1S6M7; I3LBV1; Q2HJ81; E1BJK2; Q767L7; F2Z571; F2Z5B2	0	1030.55	0				No Quan Values	Not Found	Not Found	Not Found	High	22
FALSE	High	AVPYPQR	R			1	1	8	sp	0	830.452	0	1.47821e+06	17464788	566663		High	High	High	High	27	17.57
FALSE	High	AWAVAR	R			1	1	1	sp	0	673.378	0	166611	534433			Peak Found	High	Not Found	High	20	20.23
FALSE	High	AYHEQL	L			7	17	2	F1RK98; Q2HJB8; I3LDR2; P02550; F1SHC1; F1MNF8; F2Z5S8	0	760.362	0	168665	500129	1.18886e+06	Shared	Peak Found	High	High	High	21	17.79
FALSE	High	AYHEQLSVAEIT	T			6	16	2	F1RK98; Q2HJB8; I3LDR2; P02550; F1MNF8; F2Z5S8	0	1360.67	0	125646	221950		Shared	Peak Found	High	Not Found	High	29	34.05
FALSE	High	AYHEQLSVAEITN	N			4	13	32	F1RK98; P02550; F1MNF8; F2Z5S8	0	1474.72	0	4.5945e+06	8.92778e+06	1.72366e+07	Shared	High	High	High	High	55	32.49
FALSE	High	AYHEQLSVAEITNA	A			4	13	5	F1RK98; P02550; F1MNF8; F2Z5S8	0	1545.75	0	473413	1.17473e+06		Shared	High	High	Not Found	High	53	36.01
FALSE	High	AYHEQLSVAEITNACFEPANQ	Q		1xCarbamidomethyl [C15]	4	13	1	F1RK98; P02550; F1MNF8; F2Z5S8	0	2392.09	0		107255	506048	Shared	Not Found	Peak Found	High	High	79	41.99
FALSE	High	AYHEQLSVAEITNACFEPANQMVK	K		1xCarbamidomethyl [C15]; 1xOxidation [M22]	4	13	279	F1RK98; P02550; F1MNF8; F2Z5S8	0	2766.29	0	5.11127e+07	1.51092e+08	2.06946e+08	Shared	High	High	High	High	87	39.93
FALSE	High	AYHEQLSVAEITNACFEPANQMVK	K		1xCarbamidomethyl [C15]	4	13	30	F1RK98; P02550; F1MNF8; F2Z5S8	0	2750.29	0	1.71691e+06	1.43416e+07	8.81867e+07	Shared	High	High	High	High	87	42.76
FALSE	High	AYHEQLSVAEITSSCFEPNSQMVK	K		1xCarbamidomethyl [C15]; 1xOxidation [M22]	2	3	1	Q2HJB8; I3LDR2	0	2771.27	0	681260			Shared	High	Not Found	Not Found	High	61	39.16
FALSE	High	AYHEQLTVAEITNACFEPANQMVK	K		1xCarbamidomethyl [C15]; 1xOxidation [M22]	1	1	11	F1SHC1	0	2780.3	0	5.19055e+06	2.6384e+07	3.35929e+07		Peak Found	High	High	High	25	40.35
FALSE	High	CAFAGGYGGGFGSGYGGGFGGGFGGGR	R		1xCarbamidomethyl [C1]	1	1	2	IPI00000006.1	0	2391	0	386134				High	Not Found	Not Found	High	15	42.21
FALSE	High	CCLLYR	R		2xCarbamidomethyl [C1; C2]	6	13	2	G5E6J5; P02550; F1SHC1; F1MNF8; F1RYV9; F2Z5S8	0	884.412	0	355790	1.12607e+06		Shared	Peak Found	High	High	High	31	25.26
FALSE	High	CEMEQQNQEYK	K		1xCarbamidomethyl [C1]	1	1	3	IPI00000011.1	0	1486.59	0	70229.8	109742			Peak Found	High	Not Found	High	54	15.31
FALSE	High	CIDNEALYDICFR	R		2xCarbamidomethyl [C1; C11]	8	13	1	F2Z5K5; F1S6M7; I3LBV1; Q2HJ81; E1BJK2; Q767L7; F2Z571; F2Z5B2	0	1688.74	0				No Quan Values	Not Found	Not Found	High	High	87
FALSE	High	CLEHGIQPDGQMPSDK	K		1xCarbamidomethyl [C1]; 1xOxidation [M12]	6	15	15	F1RK98; P02550; A7E1S5; F1SHC1; F1MNF8; F2Z5S8	0	1827.8	0	434911	1016732	3.46692e+06	Shared	High	High	High	High	72	19.17
FALSE	High	CLEHGIQPDGQMPSDK	K		1xCarbamidomethyl [C1]	6	15	17	F1RK98; P02550; A7E1S5; F1SHC1; F1MNF8; F2Z5S8	0	1811.81	0	1.07241e+06	4.21819e+06	4.03797e+07	Shared	High	High	High	High	78	24.02
FALSE	High	DAEAWFNEK	K			1	2	24	IPI00000012.1	0	1109.49	0	73835706	49363774	2.06161e+07		High	High	High	High	70	33.63
FALSE	High	DAEEWFFTK	K			1	1	4	IPI00000011.1	0	1172.53	0	4624218				High	High	Not Found	High	41	43.55
FALSE	High	DAETWFLSK	K			1	1	10	IPI00000013.1	0	1096.53	0	1.27334e+06	4.3058e+06	735349		High	High	High	High	45	41
FALSE	High	DAIADAEQR	R			2	2	1	IPI00000008.1; sp	0	988.469	0				Shared	Not Found	Not Found	Not Found	High	17	17.7
FALSE	High	DDNPNLPR	R			1	1	4	sp	0	940.448	0	186274	368552	123195		High	High	Peak Found	High	37	17.42
FALSE	High	DDPHACYSTVFDK	K		1xCarbamidomethyl [C6]	1	1	1	sp	0	1554.65	0				No Quan Values	Not Found	High	Not Found	High	30
FALSE	High	DDSFNTFFSETGAGK	K			5	15	4	F1RK98; P02550; A7E1S5; F1SHC1; F1MNF8	0	1622.7	0				Shared	High	Not Found	Not Found	High	69	42.8
FALSE	High	DEHGIDPSGNYVGDSDLQLER	R			1	2	2	F1S6M7	0	2316.04	0					Not Found	Not Found	Not Found	High	76	35.01
FALSE	High	DEHGIDPTGSYHGDSDLQLER	R			2	6	2	E1BJB1; F2Z5B2	0	2341.03	0				Shared	Not Found	Not Found	Not Found	High	65	30.55
FALSE	High	DIEIATYR	R			6	14	2	sp; sp; IPI00000001.1; sp; IPI00000004.1; IPI00000002.1	0	980.505	0				Shared	Not Found	Not Found	Not Found	High	37	30.56
FALSE	High	DIENQYETQ	Q			1	2	1	IPI00000010.1	0	1139.49	0					Not Found	Not Found	Not Found	High	21	20.98
FALSE	High	DIENQYETQIT	T			1	2	1	IPI00000010.1	0	1353.62	0					Not Found	Not Found	Not Found	High	22	31.24
FALSE	High	DIENQYETQITQIEHEVSSSGQEVQ	Q			1	2	1	IPI00000010.1	0	2891.32	0	171515				Peak Found	Not Found	Not Found	High	20	50.08
FALSE	High	DIENQYETQITQIEHEVSSSGQEVQSS	S			1	2	1	IPI00000010.1	0	3065.38	0					Not Found	Not Found	Not Found	High	26	49.77
FALSE	High	DIENQYETQITQIEHEVSSSGQEVQSSAK	K			1	2	16	IPI00000010.1	0	3264.51	0	3.60818e+07	4.79833e+07	9.96761e+06		High	High	High	High	143	49.13
FALSE	High	DIERPTYTNLNR	R			6	17	2	F1RK98; Q2HJB8; I3LDR2; P02550; F1SHC1; F2Z5S8	0	1491.76	0				No Quan Values	Not Found	Not Found	High	High	45
FALSE	High	DIPPCGLKMAATFIGNSTAIQELFK	K		1xCarbamidomethyl [C5]; 1xOxidation [M9]	1	1	1	I3LBV1	1	2738.39	0				No Quan Values	Not Found	Not Found	Not Found	High	42
FALSE	High	DLDSIIAEVK	K			5	6	1	sp; IPI00000008.1; IPI00000001.1; IPI00000005.1; sp	0	1102.6	0				No Quan Values	Not Found	Not Found	Not Found	High	39
FALSE	High	DLEDALQQAK	K			2	3	1	sp; IPI00000001.1	0	1130.57	0				Shared	Not Found	Not Found	Not Found	High	39	31.58
FALSE	High	DLEPTVIDEVR	R			4	12	1	P02550; A7E1S5; F1SHC1; F1MNF8	0	1285.66	0				Shared	Not Found	Not Found	Not Found	High	76	36.42
FALSE	High	DLGEENFK	K			1	1	1	sp	0	951.442	0					Not Found	Not Found	Not Found	High	23	23.44
FALSE	High	DLNLDGIIAEVK	K			1	1	1	sp	0	1299.72	0					Not Found	Not Found	Not Found	High	68	50.09
FALSE	High	DMPIQAFLLYQEPVLGPVR	R		1xOxidation [M2]	1	1	18	sp	0	2202.16	0	1.62799e+06	10450671	502890		High	High	High	High	92	54.43
FALSE	High	DMPIQAFLLYQEPVLGPVR	R			1	1	1	sp	0	2186.17	0				No Quan Values	Not Found	Not Found	Not Found	High	81
FALSE	High	DNNIEQISSYK	K			1	2	1	IPI00000012.1	0	1310.62	0				No Quan Values	Not Found	Not Found	Not Found	High	21
FALSE	High	DQIVDLTVGN	N			1	2	1	IPI00000010.1	0	1073.55	0					Not Found	Not Found	Not Found	High	19	36.45
FALSE	High	DQIVDLTVGNNK	K			1	2	10	IPI00000010.1	0	1315.69	0	4.34073e+06	6.56276e+06			High	High	High	High	68	31.91
FALSE	High	DQYEQMAEK	K			1	1	5	IPI00000013.1	0	1141.48	0	227954	1.4014e+06	160469		High	High	High	High	36	17.84
FALSE	High	DSFNTFFSETGAGK	K			5	15	6	F1RK98; P02550; A7E1S5; F1SHC1; F1MNF8	0	1507.67	0	4818972	2347026	586474	Shared	High	High	High	High	58	41.5
FALSE	High	DVDAAYLNK	K			1	1	2	IPI00000004.1	0	1008.5	0	479291				High	Not Found	Not Found	High	30	23.14
FALSE	High	DVDAAYLNKVELEAK	K			1	1	1	IPI00000004.1	1	1677.87	0				No Quan Values	High	Not Found	Not Found	High	74
FALSE	High	DVDAAYMNK	K		1xOxidation [M7]	1	1	7	IPI00000005.1	0	1042.45	0	605167	1.06116e+06	71378.3		High	High	Peak Found	High	42	14.46
FALSE	High	DVDAAYMNK	K			1	1	5	IPI00000005.1	0	1026.46	0	1.42583e+06	2.69996e+06	853750		Peak Found	High	Peak Found	High	45	19.75
FALSE	High	DVDGAYMTK	K		1xOxidation [M7]	2	3	60	sp; IPI00000001.1	0	1015.44	0	1.05895e+07	1.017e+07	3.10704e+06	Shared	High	High	High	High	41	13.73
FALSE	High	DVDGAYMTK	K			2	3	19	sp; IPI00000001.1	0	999.445	0	2.51545e+07	5.22122e+07	1.63665e+07	Shared	High	High	High	High	45	19.14
FALSE	High	DVDNAYMIK	K		1xOxidation [M7]	2	2	21	IPI00000008.1; sp	0	1084.5	0	1.56931e+07	8.82667e+06	4.41715e+06	Shared	High	High	High	High	42	23.17
FALSE	High	DVDNAYMIK	K			2	2	8	IPI00000008.1; sp	0	1068.5	0	1.26022e+06	3.38745e+06	3.0394e+06	Shared	High	High	High	High	58	27.8
FALSE	High	DVFLGMFLYEYAR	R		1xOxidation [M6]	1	1	1	sp	0	1639.78	0					Not Found	Not Found	Not Found	High	65	55.65
FALSE	High	DVNAAIA	A			5	13	3	F1RK98; P02550; F1SHC1; F1MNF8; F2Z5S8	0	673.352	0	390361	1.52513e+06	2.25333e+06	Shared	Peak Found	Peak Found	High	High	34	19.95
FALSE	High	DVNAAIAAI	I			1	2	6	F2Z5S8	0	857.473	0		363846	978184		Not Found	Peak Found	High	High	45	30.14
FALSE	High	DVNAAIAAIK	K			1	2	37	F2Z5S8	0	985.568	0	101012186	2.14521e+08	3.1349e+08		High	High	High	High	78	32.54
FALSE	High	DVNAAIAT	T			4	11	1	F1RK98; P02550; F1SHC1; F1MNF8	0	774.399	0	493669	1227088	4414415	Shared	Peak Found	Peak Found	Peak Found	High	26	21.63
FALSE	High	DVNAAIATIK	K			4	11	199	F1RK98; P02550; F1SHC1; F1MNF8	0	1015.58	0	5.00091e+08	1.27115e+09	1.26863e+09	Shared	High	High	High	High	65	30.12
FALSE	High	DVNAAIATIKTK	K			4	11	9	F1RK98; P02550; F1SHC1; F1MNF8	1	1244.72	0	1.14531e+06	4.60789e+06	7.53584e+06	Shared	High	High	High	High	62	28.67
FALSE	High	DVNAAIATIKTKR	R			4	11	1	F1RK98; P02550; F1SHC1; F1MNF8	2	1400.82	0				No Quan Values	Not Found	Not Found	High	High	37
FALSE	High	DVNVAIAAIK	K			2	3	7	Q2HJB8; I3LDR2	0	1013.6	0	4.24561e+06	1.04971e+06	3.73477e+06	Shared	High	High	High	High	65	34.18
FALSE	High	DWCPTGFK	K		1xCarbamidomethyl [C3]	9	18	2	F1RK98; G5E6J5; Q2HJB8; I3LDR2; P02550; F1SHC1; F1MNF8; F1RYV9; F2Z5S8	0	1010.44	0				Shared	Not Found	Not Found	Not Found	High	21	47.42
FALSE	High	DYEEVGID	D			1	1	5	F2Z5S8	0	939.394	0	6.0379e+06	7.60531e+06			High	High	Not Found	High	33	28.46
FALSE	High	DYEEVGIDSY	Y			1	1	2	F2Z5S8	0	1189.49	0	490049	992335			High	High	Not Found	High	61	35.12
FALSE	High	DYEEVGVD	D			2	7	10	F1RK98; P02550	0	925.379	0	1.57427e+07	3.27422e+07	2.83432e+06	Shared	Peak Found	High	High	High	35	24.05
FALSE	High	DYEEVGVDSVE	E			2	7	5	F1RK98; P02550	0	1240.52	0	836333	809463		Shared	Peak Found	High	Not Found	High	45	31.27
FALSE	High	DYEEVGVDSVEGE	E			1	4	9	P02550	0	1426.59	0	1.59252e+06	6.52752e+06			High	High	Not Found	High	39	31.8
FALSE	High	DYEEVGVDSVEGEGEEEGE	E			1	4	2	P02550	0	2056.8	0		394107	1.03311e+06		Not Found	High	Peak Found	High	19	32.92
FALSE	High	DYEEVGVDSVEGEGEEEGEE	E			1	4	12	P02550	0	2185.84	0	626416	4.63988e+06	8.2951e+06		High	High	High	High	22	33.11
FALSE	High	DYEEVGVDSVEGEGEEEGEEY	Y			1	4	4	P02550	0	2348.9	0	292766	2.49413e+06	3.26408e+06		Peak Found	High	High	High	21	36.93
FALSE	High	DYLSLILNR	R			1	1	2	sp	0	1106.62	0	196093	181073			High	Peak Found	Not Found	High	58	48.68
FALSE	High	DYQELMNTK	K		1xOxidation [M6]	2	3	58	sp; IPI00000001.1	0	1157.51	0	8.34578e+06	9.0895e+06	2539599	Shared	High	High	High	High	37	18.75
FALSE	High	DYQELMNTK	K			2	3	15	sp; IPI00000001.1	0	1141.52	0	1.0704e+07	26250752	1.25794e+07	Shared	High	High	High	High	44	27.76
FALSE	High	DYQELMNVK	K		1xOxidation [M6]	4	4	12	IPI00000006.1; IPI00000008.1; sp; IPI00000007.1	0	1155.54	0	6.10204e+06	2.93493e+06	1.53522e+06	Shared	High	High	High	High	28	24.02
FALSE	High	DYQELMNVK	K			4	4	8	IPI00000006.1; IPI00000008.1; sp; IPI00000007.1	0	1139.54	0	2.68931e+06	3.84133e+06	4.04631e+06	Shared	High	Peak Found	High	High	59	32.41
FALSE	High	DYSPYFK	K			3	3	5	IPI00000011.1; sp; IPI00000013.1	0	919.42	0	8.91667e+06	1.64263e+07	1.62792e+07	Shared	Peak Found	Peak Found	High	High	38	29.26
FALSE	High	EAESCDCLQGFQLTH	H		2xCarbamidomethyl [C5; C7]	3	3	8	F2Z5K5; Q767L7; F2Z571	0	1794.74	0	6.61251e+06	8.28008e+06	2.30451e+07	Shared	High	High	High	High	98	35.78
FALSE	High	EAESCDCLQGFQLTHSLGGGTGSGMGTLLISK	K		2xCarbamidomethyl [C5; C7]; 1xOxidation [M25]	3	3	22	F2Z5K5; Q767L7; F2Z571	0	3327.53	0	3.06176e+07	1.87963e+07	2.75193e+07	Shared	High	High	High	High	56	43.87
FALSE	High	EAESCDCLQGFQLTHSLGGGTGSGMGTLLISK	K		2xCarbamidomethyl [C5; C7]	3	3	6	F2Z5K5; Q767L7; F2Z571	0	3311.53	0	511067	1.49137e+06	8810475	Shared	High	High	High	High	93	47.52
FALSE	High	EAIYDICR	R		1xCarbamidomethyl [C7]	7	18	5	F1RK98; Q2HJB8; I3LDR2; P02550; F1SHC1; F1MNF8; F2Z5S8	0	1039.49	0	348495	1.31255e+06	2.42028e+06	Shared	High	High	High	High	35	29.02
FALSE	High	EALYDICFR	R		1xCarbamidomethyl [C7]	9	15	2	E1BJB1; F2Z5K5; F1S6M7; I3LBV1; Q2HJ81; E1BJK2; Q767L7; F2Z571; F2Z5B2	0	1186.56	0		697715		Shared	Not Found	High	High	High	31	40.21
FALSE	High	EAMAPK	K			1	1	3	sp	0	646.323	0		429978			Not Found	High	Not Found	High	21	8.17
FALSE	High	EAQITDVR	R			1	2	3	IPI00000010.1	0	931.484	0		219451	250084		Not Found	Peak Found	Peak Found	High	45	18.18
FALSE	High	EASLAETEGR	R			1	2	4	IPI00000012.1	0	1062.51	0	194623	192018			High	High	Not Found	High	54	15.87
FALSE	High	EATGGNYVPR	R			1	1	1	F2Z5K5	0	1063.52	0		271077	364783		Not Found	Peak Found	High	High	55	18.3
FALSE	High	ECENCDCLQGFQLTH	H		3xCarbamidomethyl [C2; C5; C7]	1	2	7	F1S6M7	0	1910.75	0	5128209	3.56154e+06	13454322		High	High	High	High	69	35.54
FALSE	High	ECENCDCLQGFQLTHSLGGGTGSGMGTLLISK	K		3xCarbamidomethyl [C2; C5; C7]; 1xOxidation [M25]	1	2	8	F1S6M7	0	3443.53	0	2.57581e+07	1.92267e+07	2.16406e+07		High	Peak Found	High	High	66	43.59
FALSE	High	ECENCDCLQGFQLTHSLGGGTGSGMGTLLISK	K		3xCarbamidomethyl [C2; C5; C7]	1	2	4	F1S6M7	0	3427.54	0	495164	686763	6.49731e+06		High	Peak Found	High	High	83	47.35
FALSE	High	ECISIH	H		1xCarbamidomethyl [C2]	6	13	8	F1RK98; G5E6J5; P02550; A7E1S5; F1SHC1; F1MNF8	0	758.35	0	1.94819e+06	5.90623e+06	50400696	Shared	High	High	High	High	24	18.79
FALSE	High	ECISIHVGQAGVQ	Q		1xCarbamidomethyl [C2]	5	12	2	F1RK98; P02550; A7E1S5; F1SHC1; F1MNF8	0	1397.68	0				No Quan Values	Not Found	Not Found	Not Found	High	29
FALSE	High	ECISIHVGQAGVQIGN	N		1xCarbamidomethyl [C2]	5	12	18	F1RK98; P02550; A7E1S5; F1SHC1; F1MNF8	0	1681.83	0	2.63201e+06	4.33381e+06	16274289	Shared	High	High	High	High	47	41.38
FALSE	High	ECISIHVGQAGVQIGNACWELY	Y		2xCarbamidomethyl [C2; C18]	5	12	2	F1RK98; P02550; A7E1S5; F1SHC1; F1MNF8	0	2504.17	0		49690.5	747897	Shared	Not Found	Peak Found	High	High	49	53.9
FALSE	High	ECISIHVGQAGVQIGNACWELYCLEHGIQPDGQMPSDK	K		3xCarbamidomethyl [C2; C18; C23]; 1xOxidation [M34]	5	12	3	F1RK98; P02550; A7E1S5; F1SHC1; F1MNF8	0	4312.95	0	576898	7468585	25029682	Shared	Peak Found	Peak Found	High	High	34	50.88
FALSE	High	ECISVH	H		1xCarbamidomethyl [C2]	3	6	2	Q2HJB8; F1RYV9; F2Z5S8	0	744.335	0	77101.3		619246	Shared	Peak Found	Not Found	Peak Found	High	22	14.67
FALSE	High	ECISVHVGQAGVQMGN	N		1xCarbamidomethyl [C2]; 1xOxidation [M14]	1	1	1	F2Z5S8	0	1701.77	0	206567		409189		Peak Found	Not Found	High	High	58	27.76
FALSE	High	ECISVHVGQAGVQMGN	N		1xCarbamidomethyl [C2]	1	1	5	F2Z5S8	0	1685.77	0	313030	552322	4.15777e+06		High	Peak Found	High	High	40	34.82
FALSE	High	ECISVHVGQAGVQMGNACWELYCLEHGIQPDGQMPSDK	K		3xCarbamidomethyl [C2; C18; C23]; 2xOxidation [M14; M34]	1	1	1	F2Z5S8	0	4332.89	0		279749	2.04577e+06		Not Found	Peak Found	Peak Found	High	44	44.18
FALSE	High	EDAANNYAR	R			9	21	93	F1RK98; G5E6J5; Q2HJB8; I3LDR2; P02550; A7E1S5; F1SHC1; F1MNF8; F2Z5S8	0	1023.45	0	1.84176e+07	8.14225e+07	1.41688e+08	Shared	High	High	High	High	74	10.89
FALSE	High	EDASNNYAR	R			1	1	8	F1RYV9	0	1039.44	0	638875	2.5504e+06	5.63462e+06		Peak Found	High	High	High	24	10.94
FALSE	High	EDLAALEK	K			3	6	5	F1RK98; Q2HJB8; I3LDR2	0	888.467	0	4.06496e+06		5.47349e+06	Shared	High	Not Found	High	High	55	24.88
FALSE	High	EDMAAL	L			4	10	2	P02550; F1SHC1; F1MNF8; F2Z5S8	0	649.286	0	1.58178e+06	10660971	543433	Shared	Peak Found	High	High	High	22	27.08
FALSE	High	EDMAALEK	K		1xOxidation [M3]	4	10	341	P02550; F1SHC1; F1MNF8; F2Z5S8	0	922.419	0	1.62842e+07	6.26037e+07	5.99692e+07	Shared	High	High	High	High	51	20.3
FALSE	High	EDMAALEK	K			4	10	70	P02550; F1SHC1; F1MNF8; F2Z5S8	0	906.424	0	6.65422e+07	4.30015e+08	7.15807e+08	Shared	High	High	High	High	53	20.27
FALSE	High	EDMAALEKDYEE	E		1xOxidation [M3]	4	10	1	P02550; F1SHC1; F1MNF8; F2Z5S8	1	1458.59	0	659488	838344		Shared	Peak Found	Peak Found	Not Found	High	18	23.7
FALSE	High	EDMAALEKDYEE	E			4	10	2	P02550; F1SHC1; F1MNF8; F2Z5S8	1	1442.6	0	774845	3.05291e+06		Shared	Peak Found	High	Not Found	High	25	31.86
FALSE	High	EDMAALEKDYEEVGID	D			1	1	1	F2Z5S8	1	1826.8	0	213059	659346			Peak Found	High	Not Found	High	17	42.2
FALSE	High	EDMAALEKDYEEVGVD	D		1xOxidation [M3]	1	4	3	P02550	1	1828.78	0	1.47101e+06	4594434			Peak Found	High	Not Found	High	22	34
FALSE	High	EDMAALEKDYEEVGVD	D			1	4	4	P02550	1	1812.78	0					Not Found	Not Found	Not Found	High	27	40.02
FALSE	High	EDMAALEKDYEEVGVDSVEGEGEEEGEEY	Y			1	4	2	P02550	1	3236.31	0					Not Found	Not Found	Not Found	High	19	45.91
FALSE	High	EDVPSER	R			1	1	2	sp	0	831.384	0	112572	1.29985e+06			Peak Found	High	Not Found	High	33	11.41
FALSE	High	EEAEALYH	H			2	2	4	IPI00000008.1; sp	0	961.426	0	707012			Shared	High	High	Not Found	High	40	19.71
FALSE	High	EEAEALYHSK	K			2	2	5	IPI00000008.1; sp	0	1176.55	0	745319	1.07394e+06	107490	Shared	Peak Found	High	Peak Found	High	43	17.24
FALSE	High	EEFPDR	R			3	4	8	A5GFX6; F2Z5K5; I3LBV1	0	792.352	0	929159	2.29283e+06	3.67509e+06	Shared	High	High	High	High	32	16.67
FALSE	High	EEGEFSEAR	R			7	16	4	F1RK98; Q2HJB8; I3LDR2; P02550; F1SHC1; F1MNF8; F2Z5S8	0	1053.45	0	83785.9		1.17355e+06	Shared	Peak Found	High	High	High	50	16.63
FALSE	High	EELAYLK	K			3	4	1	IPI00000012.1; IPI00000011.1; sp	0	865.467	0				No Quan Values	Not Found	Not Found	Not Found	High	37
FALSE	High	EELAYLR	R			1	1	3	IPI00000013.1	0	893.473	0	112089	1.00748e+06			Peak Found	High	Not Found	High	40	28.68
FALSE	High	EELQITAGR	R			2	3	2	sp; IPI00000001.1	0	1016.54	0	277814	123572		Shared	High	Peak Found	Not Found	High	39	23.99
FALSE	High	EEMSQLTGQNSGDVNVEINVAPGK	K		1xOxidation [M3]	1	2	9	IPI00000010.1	0	2532.19	0	400860	794440			Peak Found	Peak Found	Not Found	High	61	33.43
FALSE	High	EEMSQLTGQNSGDVNVEINVAPGKDLTK	K		1xOxidation [M3]	1	2	2	IPI00000010.1	1	2989.44	0	202783	253342			High	High	Not Found	High	23	34.83
FALSE	High	EEQLQQIR	R			1	2	2	IPI00000012.1	0	1043.55	0			5.24612e+06		Not Found	Not Found	Peak Found	High	38	20.59
FALSE	High	EEYPDR	R			7	13	22	E1BJB1; F1S6M7; Q2HJ81; E1BJK2; Q767L7; F2Z571; F2Z5B2	0	808.347	0	2.05758e+06	2.37211e+06	9.94573e+06	Shared	High	High	High	High	33	10.67
FALSE	High	EFTPPVQAAYQK	K			1	1	3	sp	0	1378.7	0	362956	3.08146e+06	475615		Peak Found	High	High	High	25	29.93
FALSE	High	EGEFSEAR	R			7	16	1	F1RK98; Q2HJB8; I3LDR2; P02550; F1SHC1; F1MNF8; F2Z5S8	0	924.406	0				Shared	Not Found	Not Found	Not Found	High	33	15.26
FALSE	High	EGMEEGEFSEAR	R		1xOxidation [M3]	7	16	1	F1RK98; Q2HJB8; I3LDR2; P02550; F1SHC1; F1MNF8; F2Z5S8	0	1386.55	0				No Quan Values	Not Found	Not Found	Not Found	High	37
FALSE	High	EGNEQFINAAK	K			1	1	4	sp	0	1220.59	0	135578	118518			High	High	High	High	25	23.23
FALSE	High	EHGIDPSGNYVGDSDLQLER	R			1	2	3	F1S6M7	0	2201.01	0	1.45629e+06	138167			High	Peak Found	Not Found	High	76	33.76
FALSE	High	EHGIDPTGSYHGDSDLQLER	R			2	6	6	E1BJB1; F2Z5B2	0	2226.01	0	1.9861e+06	973132	214106	Shared	High	High	Peak Found	High	71	29.35
FALSE	High	EHGIDPTGTYHGDSDLQLER	R			2	2	5	F2Z5K5; F2Z571	0	2240.02	0	1.22082e+06	446420		Shared	High	High	Not Found	High	39	29.76
FALSE	High	EHGIQPDGQMPSDK	K			6	15	2	F1RK98; P02550; A7E1S5; F1SHC1; F1MNF8; F2Z5S8	0	1538.69	0	86594.7	321570		Shared	Peak Found	Peak Found	Not Found	High	53	19.24
FALSE	High	EIDPEIQK	K			3	4	1	sp; IPI00000001.1; IPI00000004.1	0	971.504	0	384180	313812	225247	Shared	Peak Found	Peak Found	Peak Found	High	29	20.32
FALSE	High	EIELQSQLALK	K			1	2	4	IPI00000012.1	0	1271.72	0	609778	655950			High	High	Peak Found	High	60	37.53
FALSE	High	EIELQSQLSMK	K		1xOxidation [M10]	3	3	1	IPI00000011.1; sp; IPI00000013.1	0	1321.67	0				Shared	Not Found	Not Found	Not Found	High	35	29.47
FALSE	High	EIETYHN	N			1	2	1	IPI00000010.1	0	905.4	0	49012.7	93633.6			Peak Found	Peak Found	Not Found	High	14	13.93
FALSE	High	EIETYHNLLEGGQEDFESS	S			1	2	1	IPI00000010.1	0	2196.96	0					Not Found	Not Found	Not Found	High	39	40.4
FALSE	High	EIETYHNLLEGGQEDFESSGAGK	K			1	2	19	IPI00000010.1	0	2510.13	0	3.94855e+07	39563230	6.569e+06		High	High	High	High	104	38.11
FALSE	High	EIIDLVLD	D			4	13	2	P02550; A7E1S5; F1SHC1; F1MNF8	0	929.519	0	102958	417713	568376	Shared	Peak Found	Peak Found	Peak Found	High	21	49.5
FALSE	High	EIIDLVLDR	R			4	13	454	P02550; A7E1S5; F1SHC1; F1MNF8	0	1085.62	0	5.11689e+08	1.04181e+09	1456713542	Shared	High	High	High	High	60	44.63
FALSE	High	EIIDLVLDRIR	R			3	11	2	P02550; A7E1S5; F1SHC1	1	1354.81	0		102960	76501	Shared	Not Found	Peak Found	Peak Found	High	31	49.69
FALSE	High	EIIDPVLDR	R			1	1	24	F2Z5S8	0	1069.59	0	1.00697e+08	219474249	295461898		High	High	High	High	50	34.54
FALSE	High	EIKIEISELNR	R			2	2	9	IPI00000008.1; sp	1	1343.75	0	1.91355e+06	965351	258389	Shared	High	High	High	High	55	35.45
FALSE	High	EIQTYR	R			1	2	1	IPI00000012.1	0	809.415	0	78138.5	41632.4			Peak Found	Peak Found	Not Found	High	18	14.32
FALSE	High	EITDLR	R			1	1	1	sp	0	746.404	0				No Quan Values	Peak Found	Peak Found	Peak Found	High	22	19.29
FALSE	High	EIVDLVLDR	R			1	3	1	F1RK98	0	1071.6	0				No Quan Values	Not Found	Not Found	Not Found	High	34
FALSE	High	EIVHIQ	Q			9	14	2	A5GFX6; E1BJB1; F2Z5K5; F1S6M7; Q2HJ81; E1BJK2; Q767L7; F2Z571; F2Z5B2	0	738.414	0	348846	378245	1.28061e+06	Shared	Peak Found	Peak Found	Peak Found	High	20	22.39
FALSE	High	EIVHIQAGQ	Q			7	12	22	E1BJB1; F2Z5K5; F1S6M7; Q2HJ81; Q767L7; F2Z571; F2Z5B2	0	994.532	0	2.23023e+06	2.08999e+06	7.63418e+06	Shared	Peak Found	High	High	High	32	23.14
FALSE	High	EIVHIQAGQC	C		1xCarbamidomethyl [C10]	7	12	4	E1BJB1; F2Z5K5; F1S6M7; Q2HJ81; Q767L7; F2Z571; F2Z5B2	0	1154.56	0	749964	723341	1.99084e+06	Shared	Peak Found	Peak Found	High	High	28	24.22
FALSE	High	EIVHIQAGQCGN	N		1xCarbamidomethyl [C10]	7	12	56	E1BJB1; F2Z5K5; F1S6M7; Q2HJ81; Q767L7; F2Z571; F2Z5B2	0	1325.63	0	6.05612e+07	4.40219e+07	2.46748e+08	Shared	High	High	High	High	54	23.42
FALSE	High	EIVHIQAGQCGNQIGAK	K		1xCarbamidomethyl [C10]	6	11	184	E1BJB1; F2Z5K5; F1S6M7; Q767L7; F2Z571; F2Z5B2	0	1822.92	0	1.77638e+08	2.42495e+08	3.09826e+08	Shared	High	High	High	High	74	25.49
FALSE	High	EIVHIQAGQCGNQIGTK	K		1xCarbamidomethyl [C10]	1	1	1	Q2HJ81	0	1852.93	0	1327997	1.53071e+06	799437		High	Peak Found	Peak Found	High	21	24.72
FALSE	High	EKVNELSK	K			1	1	2	sp	1	946.52	0	59273.2	530754			Peak Found	High	Not Found	High	33	11.52
FALSE	High	ELLQQVDTSTR	R			2	3	3	sp; IPI00000001.1	0	1289.67	0				Shared	Not Found	Not Found	Not Found	High	62	27.47
FALSE	High	ELTTEIDNNIEQISSY	Y			1	2	1	IPI00000012.1	0	1868.88	0					Not Found	Not Found	Not Found	High	33	46.22
FALSE	High	ELTTEIDNNIEQISSYK	K			1	2	25	IPI00000012.1	0	1996.97	0	3.57285e+07	1.57355e+07	6189191		High	High	High	High	112	43.76
FALSE	High	ELTTEIDNNIEQISSYKSEITELRR	R			1	2	3	IPI00000012.1	2	2981.51	0	490411				High	High	Not Found	High	69	47.16
FALSE	High	EMEQNLR	R			1	2	1	IPI00000010.1	0	919.43	0					Not Found	Not Found	Not Found	High	36	15.04
FALSE	High	EMIGSVEEQLAQLR	R		1xOxidation [M2]	1	1	2	IPI00000011.1	0	1618.81	0					Not Found	Not Found	Not Found	High	96	42.11
FALSE	High	EMPFPK	K			1	1	1	sp	0	748.37	0		1.30913e+06			Not Found	High	Not Found	High	29	25.89
FALSE	High	EPGTMDSVR	R		1xOxidation [M5]	8	13	1	E1BJB1; F2Z5K5; F1S6M7; I3LBV1; Q2HJ81; Q767L7; F2Z571; F2Z5B2	0	1007.45	0				Shared	Not Found	Not Found	Not Found	High	26	38.42
FALSE	High	EPMIGVNQELAYFYPELFR	R		1xOxidation [M3]	1	1	5	sp	0	2332.13	0	510436	2503968			Peak Found	High	Not Found	High	64	57.59
FALSE	High	ERPTYTNLNR	R			6	17	2	F1RK98; Q2HJB8; I3LDR2; P02550; F1SHC1; F2Z5S8	0	1263.64	0			546022	Shared	Not Found	Not Found	High	High	47	30.94
FALSE	High	ESEHCDCLQGFQLTHSLGGGTGSGMGTLLISK	K		2xCarbamidomethyl [C5; C7]	1	2	1	I3LBV1	0	3377.56	0				Not Reliable	Not Found	Not Found	Not Found	High	48
FALSE	High	ESESCDCLQGFQLTH	H		2xCarbamidomethyl [C5; C7]	2	6	16	E1BJB1; F2Z5B2	0	1810.74	0	13608617	1.52924e+07	4.264e+07	Shared	High	High	High	High	98	35.64
FALSE	High	ESESCDCLQGFQLTHSLGGGTGSGMGTLLISK	K		2xCarbamidomethyl [C5; C7]; 1xOxidation [M25]	2	6	53	E1BJB1; F2Z5B2	0	3343.52	0	5.88015e+07	5.39068e+07	7.0007e+07	Shared	High	High	High	High	76	43.71
FALSE	High	ESESCDCLQGFQLTHSLGGGTGSGMGTLLISK	K		2xCarbamidomethyl [C5; C7]	2	6	10	E1BJB1; F2Z5B2	0	3327.53	0	1086467	3220317	1.70625e+07	Shared	Peak Found	High	High	High	100	47.43
FALSE	High	ESIDLVLDR	R			2	3	4	Q2HJB8; I3LDR2	0	1059.57	0	4.90522e+06	761280	3.90823e+06	Shared	High	High	High	High	65	36.2
FALSE	High	ESTLHLVLR	R			1	1	8	sp	0	1067.62	0	849939	778560			High	High	Not Found	High	57	31.64
FALSE	High	EVASNSELVQSSR	R			1	1	8	IPI00000013.1	0	1405.69	0	677115	2.79005e+06	175954		High	High	Peak Found	High	83	19.28
FALSE	High	EVATNSELVQSGK	K			1	1	9	IPI00000011.1	0	1361.69	0	5365846	1.10909e+07	1.76168e+06		High	High	High	High	93	19.57
FALSE	High	EVDEQLLNVQTR	R			1	1	2	E1BJK2	0	1443.74	0					High	Not Found	Not Found	High	69	31.93
FALSE	High	EVDEQMLAIQSK	K	1	1xOxidation [M6]	1	2	110	F1S6M7	0	1406.68	0	1.05405e+08	7.49604e+07	9.10031e+07		High	High	High	High	88	24.29
FALSE	High	EVDEQMLAIQSK	K	1		1	2	22	F1S6M7	0	1390.69	3	6.50207e+07	8.96912e+07	2.50305e+08		High	High	High	High	60	30.97
FALSE	High	EVDEQMLNVQNK	K	1	1xOxidation [M6]	4	5	132	E1BJB1; Q767L7; F2Z571; F2Z5B2	0	1462.68	0	8.87131e+07	1.28557e+08	1.23069e+08	Shared	High	High	High	High	65	20.88
FALSE	High	EVDEQMLNVQNK	K	1		4	5	38	E1BJB1; Q767L7; F2Z571; F2Z5B2	0	1446.69	0	8.82204e+07	2.14807e+08	4.1756e+08	Shared	High	High	High	High	62	27.59
FALSE	High	EVDEQMLNVQNKNSSYFVEWIPNNVK	K		1xOxidation [M6]	4	5	1	E1BJB1; Q767L7; F2Z571; F2Z5B2	1	3140.5	0			294369	Shared	Not Found	Not Found	High	High	34	45.77
FALSE	High	EVDEQMLSVQSK	K		1xOxidation [M6]	1	1	49	F2Z5K5	0	1408.66	0	7.58612e+06	8.57611e+06	1.1007e+07		High	High	High	High	89	21.22
FALSE	High	EVDEQMLSVQSK	K			1	1	17	F2Z5K5	0	1392.67	0	8.92141e+06	25439060	5.06051e+07		High	High	High	High	64	27.71
FALSE	High	EVFTSSSSSSSR	R			1	1	6	IPI00000013.1	0	1260.57	0	225706	760408	185464		High	High	High	High	58	15.01
FALSE	High	EVISDEHGIDPTGSYHGDSDLQLER	R			2	6	1	E1BJB1; F2Z5B2	0	2769.26	0				No Quan Values	Not Found	Not Found	Not Found	High	19
FALSE	High	EVSSSGQEVQSSAK	K			1	2	1	IPI00000010.1	0	1422.67	0				No Quan Values	Not Found	Not Found	Not Found	High	67
FALSE	High	EVTDLR	R			1	1	2	IPI00000014.1	0	732.389	0				No Quan Values	Peak Found	High	High	High	26	15.86
FALSE	High	EVTINQSLLQPLNVEIDPEIQK	K			2	3	1	sp; IPI00000001.1	0	2520.36	0				Shared	Not Found	Not Found	Not Found	High	53	51.2
FALSE	High	EVTQLR	R			1	2	9	IPI00000010.1	0	745.42	0	32868906	49953104	12267252		High	High	Peak Found	High	35	14.03
FALSE	High	EYQELMNVK	K			2	2	4	IPI00000005.1; IPI00000002.1	0	1153.56	0	231490	900261	491376	Shared	High	High	Peak Found	High	19	29.47
FALSE	High	EYQELMSVK	K		1xOxidation [M6]	1	2	1	IPI00000004.1	0	1142.54	0	633084				High	Not Found	Not Found	High	25	22.27
FALSE	High	EYQELMSVK	K			1	2	2	IPI00000004.1	0	1126.54	0	369803		442125		High	Not Found	High	High	25	29.69
FALSE	High	FALPQYLK	K			1	1	5	sp	0	979.561	0	2.30749e+06	1.22004e+07			High	High	Not Found	High	36	40.25
FALSE	High	FAPLTAR	R			3	5	2	F1S6M7; I3LBV1; Q2HJ81	0	775.446	0	197627		755927	Shared	Peak Found	Not Found	High	High	29	24.83
FALSE	High	FAPLTSR	R			5	9	1	E1BJB1; F2Z5K5; Q767L7; F2Z571; F2Z5B2	0	791.441	0	333176	324141	1.06813e+06	Shared	Peak Found	Peak Found	High	High	23	23.8
FALSE	High	FASFIDK	K			10	12	14	IPI00000006.1; sp; IPI00000008.1; sp; IPI00000001.1; IPI00000005.1; sp; IPI00000007.1; IPI00000004.1; IPI00000002.1	0	827.43	0	55247259	58077707	1.87605e+07	Shared	High	High	High	High	57	30.39
FALSE	High	FASFIDKVR	R			9	11	7	IPI00000006.1; sp; IPI00000008.1; sp; IPI00000001.1; IPI00000005.1; sp; IPI00000007.1; IPI00000002.1	1	1082.6	0	2.25106e+06	652079		Shared	High	Peak Found	Not Found	High	58	32.08
FALSE	High	FCETGAGK	K		1xCarbamidomethyl [C2]	1	1	5	F2Z5S8	0	869.382	0	231281	122698	419075		High	Peak Found	High	High	53	10.96
FALSE	High	FDGALNVDLTEF	F			7	17	1	F1RK98; Q2HJB8; I3LDR2; P02550; F1SHC1; F1MNF8; F2Z5S8	0	1340.64	0	89569.4	91474.2	1.53892e+06	Shared	Peak Found	Peak Found	High	High	34	51.57
FALSE	High	FDGALNVDLTEFQTN	N			7	17	5	F1RK98; Q2HJB8; I3LDR2; P02550; F1SHC1; F1MNF8; F2Z5S8	0	1683.79	0	2.26354e+06	3448636	13925838	Shared	Peak Found	High	High	High	37	47.42
FALSE	High	FDGALNVDLTEFQTNLVPYPR	R			7	17	169	F1RK98; Q2HJB8; I3LDR2; P02550; F1SHC1; F1MNF8; F2Z5S8	0	2409.21	0	6.95968e+07	1.86619e+08	3.70335e+08	Shared	High	High	High	High	166	54.07
FALSE	High	FDLMFAK	K		1xOxidation [M4]	2	2	2	G5E6J5; F1RYV9	0	887.433	0				No Quan Values	Not Found	High	Peak Found	High	31	32.38
FALSE	High	FDLMYAK	K		1xOxidation [M4]	7	15	195	F1RK98; Q2HJB8; I3LDR2; P02550; F1SHC1; F1MNF8; F2Z5S8	0	903.428	0	1.51213e+08	2.96788e+08	430133512	Shared	High	High	High	High	50	29.25
FALSE	High	FDLMYAK	K			7	15	47	F1RK98; Q2HJB8; I3LDR2; P02550; F1SHC1; F1MNF8; F2Z5S8	0	887.433	1	1.39069e+07	1.15852e+08	4.83604e+08	Shared	High	High	High	High	60	34.24
FALSE	High	FDLMYAKR	R		1xOxidation [M4]	7	15	2	F1RK98; Q2HJB8; I3LDR2; P02550; F1SHC1; F1MNF8; F2Z5S8	1	1059.53	0	290068	550514	437277	Shared	High	High	Peak Found	High	23	25.16
FALSE	High	FDLMYAKR	R			7	15	3	F1RK98; Q2HJB8; I3LDR2; P02550; F1SHC1; F1MNF8; F2Z5S8	1	1043.53	0	105158	407144	4.13251e+06	Shared	Peak Found	Peak Found	High	High	40	30.04
FALSE	High	FEGSLNMDL	L			1	2	1	F1RZM6	0	1025.46	0	164142	302607	155907		Peak Found	Peak Found	Peak Found	High	17	13.79
FALSE	High	FEMEQNLR	R		1xOxidation [M3]	1	2	19	IPI00000010.1	0	1082.49	0	2.88745e+06	5.4477e+06	1049870		High	High	Peak Found	High	66	18.67
FALSE	High	FEMEQNLR	R			1	2	11	IPI00000010.1	0	1066.5	0	2.265e+06	9.1678e+06	1.8797e+06		High	High	High	High	61	27.55
FALSE	High	FEPANQMVK	K			5	14	1	F1RK98; P02550; F1SHC1; F1MNF8; F2Z5S8	0	1063.52	0				No Quan Values	Not Found	Not Found	High	High	22
FALSE	High	FFESFGDLSTPDAVMGNPK	K		1xOxidation [M15]	1	1	1	sp	0	2074.94	0		4.36835e+06			Not Found	High	Not Found	High	83	43.15
FALSE	High	FFMPGFAPLTSR	R		1xOxidation [M3]	5	9	1	E1BJB1; F2Z5K5; Q767L7; F2Z571; F2Z5B2	0	1386.69	0				Not Reliable	High	Not Found	Not Found	High	48
FALSE	High	FFMPGFAPLTSR	R			5	9	2	E1BJB1; F2Z5K5; Q767L7; F2Z571; F2Z5B2	0	1370.69	0				Shared	Not Found	Not Found	High	High	54	49.79
FALSE	High	FFVAPFPEVFGK	K			1	1	7	sp	0	1384.73	0	2301139	18584900	745250		High	High	Peak Found	High	49	53.83
FALSE	High	FGGFGGPGGVGGLGGPGGFGPGGYPGGIH	H			2	2	1	IPI00000008.1; sp	0	2443.16	0				No Quan Values	Not Found	Not Found	Not Found	High	25
FALSE	High	FGGFGGPGGVGGLGGPGGFGPGGYPGGIHEV	V			2	2	3	IPI00000008.1; sp	0	2671.27	0	122258	267093		Shared	Peak Found	High	Not Found	High	29	49.61
FALSE	High	FGGFGGPGGVGGLGGPGGFGPGGYPGGIHEVSVNQSLLQPLNVK	K			2	2	14	IPI00000008.1; sp	0	4092.07	0	12642547	9.86945e+06	4.02542e+06	Shared	High	High	High	High	37	53.29
FALSE	High	FGGGGFGSR	R			2	2	1	IPI00000008.1; sp	0	841.395	0				Shared	Not Found	Not Found	Not Found	High	29	23.51
FALSE	High	FGGSSGGYGGLGGFGGGSFR	R			1	1	2	IPI00000012.1	0	1780.8	0	268152	334404			Peak Found	Peak Found	Not Found	High	97	40.79
FALSE	High	FIFGQSGAGNNWAK	K			1	2	2	F1S6M7	0	1496.73	0				No Quan Values	High	Not Found	Not Found	High	78
FALSE	High	FIGNSTAIQELFK	K			8	11	7	E1BJB1; F2Z5K5; F1S6M7; I3LBV1; Q2HJ81; Q767L7; F2Z571; F2Z5B2	0	1467.78	0	2.6233e+06	3.11808e+06	8598949	Shared	High	High	High	High	83	48.07
FALSE	High	FINNLR	R			2	3	1	sp; IPI00000001.1	0	776.441	0				Shared	Not Found	Not Found	Not Found	High	20	23.11
FALSE	High	FKVGINYQPPTVXLSNTTAIAEAWAR	R			1	1	1	I3LDR2	1	2818.49	0			380500		Not Found	Not Found	High	High	33	56.23
FALSE	High	FLASVSTVLTSK	K			1	1	1	sp	0	1252.71	0		1.41568e+06			Not Found	High	Not Found	High	88	39.72
FALSE	High	FLEQQNK	K			7	13	5	IPI00000006.1; sp; IPI00000005.1; IPI00000007.1; sp; IPI00000004.1; IPI00000002.1	0	906.468	1	7459966	10884219	3.05768e+06	Shared	High	Peak Found	High	High	28	14.85
FALSE	High	FLEQQNQVL	L			4	5	4	sp; IPI00000008.1; IPI00000001.1; sp	0	1118.58	0	647144			Shared	High	Not Found	Not Found	High	38	36.14
FALSE	High	FLEQQNQVLQ	Q			4	5	1	sp; IPI00000008.1; IPI00000001.1; sp	0	1246.64	0	521578	467621		Shared	Peak Found	High	Not Found	High	33	31.99
FALSE	High	FLEQQNQVLQTK	K			4	5	38	sp; IPI00000008.1; IPI00000001.1; sp	0	1475.79	0	1.68008e+08	1.85925e+08	6.53416e+07	Shared	High	High	High	High	71	28.73
FALSE	High	FLEQQNQVLQTKWELLQQVDTSTR	R			2	3	5	sp; IPI00000001.1	1	2932.52	0	919006	1.28474e+06		Shared	Peak Found	High	High	High	94	46.98
FALSE	High	FMPGFAPLTAR	R		1xOxidation [M2]	3	5	4	F1S6M7; I3LBV1; Q2HJ81	0	1223.62	0	1.43756e+06	492275	989594	Shared	High	High	High	High	41	37.26
FALSE	High	FMPGFAPLTAR	R			3	5	1	F1S6M7; I3LBV1; Q2HJ81	0	1207.63	0			784879	Shared	Not Found	Not Found	High	High	39	41.67
FALSE	High	FMPGFAPLTSR	R		1xOxidation [M2]	5	9	7	E1BJB1; F2Z5K5; Q767L7; F2Z571; F2Z5B2	0	1239.62	0	1.30802e+06	1.22714e+06	2.66395e+06	Shared	High	High	High	High	29	36.65
FALSE	High	FMPGFAPLTSR	R			5	9	2	E1BJB1; F2Z5K5; Q767L7; F2Z571; F2Z5B2	0	1223.62	0		188842	3.3257e+06	Shared	Not Found	Peak Found	High	High	27	41.06
FALSE	High	FNGNTLDNDIMLIK	K		1xOxidation [M11]	1	1	5	sp	0	1623.8	0	1.12091e+06	1.20701e+06	963368		High	High	High	High	67	42.32
FALSE	High	FPGQLN	N			10	16	7	A5GFX6; E1BJB1; F2Z5K5; F1S6M7; I3LBV1; Q2HJ81; E1BJK2; Q767L7; F2Z571; F2Z5B2	0	675.346	0	1.90317e+06	2.07376e+06	7.5041e+06	Shared	High	Peak Found	High	High	29	25.97
FALSE	High	FPGQLNADLR	R			10	16	299	A5GFX6; E1BJB1; F2Z5K5; F1S6M7; I3LBV1; Q2HJ81; E1BJK2; Q767L7; F2Z571; F2Z5B2	0	1130.6	0	1.7032e+08	2.08342e+08	7.40082e+08	Shared	High	High	High	High	82	32.75
FALSE	High	FPGQLNADLRK	K			10	16	101	A5GFX6; E1BJB1; F2Z5K5; F1S6M7; I3LBV1; Q2HJ81; E1BJK2; Q767L7; F2Z571; F2Z5B2	1	1258.69	0	5.40793e+07	1.00108e+08	9.59831e+07	Shared	High	High	High	High	62	27.88
FALSE	High	FPLATYAPVISAEK	K			5	14	3	F1RK98; P02550; F1SHC1; F1MNF8; F2Z5S8	0	1506.82	0			527591	Shared	Not Found	Not Found	High	High	83	42.85
FALSE	High	FPQYLQYLYQGPIVLNPWDQVK	K			1	1	1	sp	0	2709.41	0				No Quan Values	Not Found	High	Not Found	High	46
FALSE	High	FQNALIVR	R			2	2	10	sp; sp	0	960.563	0	973337	964344	335572	Shared	High	High	High	High	65	31.95
FALSE	High	FRPDNFIFGQSGAGNNWAK	K			1	2	4	F1S6M7	0	2126.02	0	306887		444936		High	High	High	High	82	42.67
FALSE	High	FSETGAGK	K			5	15	15	F1RK98; P02550; A7E1S5; F1SHC1; F1MNF8	0	796.384	0	908330	545042	2.39502e+06	Shared	High	High	High	High	56	10.4
FALSE	High	FSSCGGGGGSFGAGGGFGSR	R		1xCarbamidomethyl [C4]	2	3	17	sp; IPI00000001.1	0	1765.73	0	3.68047e+06	5.51655e+06	2.36649e+06	Shared	High	High	High	High	170	29.75
FALSE	High	FSSSGGGGGGGR	R			1	1	12	IPI00000010.1	0	982.434	0	581735	1.55258e+06	739472		High	High	High	High	49	7.44
FALSE	High	FSSSSGY	Y			1	2	1	IPI00000010.1	0	734.299	0				No Quan Values	Not Found	Not Found	Not Found	High	22
FALSE	High	FSSSSGYGGGSSR	R			1	2	23	IPI00000010.1	0	1235.53	0	1.86288e+07	2.87598e+07	6.84786e+06		High	High	High	High	97	14.47
FALSE	High	FTESMVVFGCPN	N		1xCarbamidomethyl [C10]	1	1	1	sp	0	1387.6	0	412150	299515	1.00796e+06		Peak Found	Peak Found	Peak Found	High	24	48.82
FALSE	High	FVAPFPEVFGK	K			1	1	1	sp	0	1237.66	0				No Quan Values	Not Found	Not Found	Not Found	High	50
FALSE	High	FVDLEPTVIDEVR	R			4	12	1	P02550; A7E1S5; F1SHC1; F1MNF8	0	1531.8	0				No Quan Values	Not Found	Not Found	Not Found	High	70
FALSE	High	FVDWCPTGFK	K		1xCarbamidomethyl [C5]	9	18	3	F1RK98; G5E6J5; Q2HJB8; I3LDR2; P02550; F1SHC1; F1MNF8; F1RYV9; F2Z5S8	0	1256.58	0				Shared	Not Found	Not Found	High	High	56	40.28
FALSE	High	FVEWIPNNVK	K			9	12	2	E1BJB1; F2Z5K5; F1S6M7; I3LBV1; Q2HJ81; E1BJK2; Q767L7; F2Z571; F2Z5B2	0	1245.66	0	2.32945e+06	2123790	3.53929e+06	Shared	Peak Found	Peak Found	Peak Found	High	19	39.14
FALSE	High	FVFGQSGAGNNWAK	K			5	9	6	E1BJB1; F2Z5K5; Q767L7; F2Z571; F2Z5B2	0	1482.71	0	589425	824036	1.61144e+06	Shared	High	High	High	High	67	36.27
FALSE	High	FWEVISDEHGID	D			8	13	7	E1BJB1; F2Z5K5; F1S6M7; I3LBV1; Q2HJ81; Q767L7; F2Z571; F2Z5B2	0	1446.65	0	2.58111e+06	4.25925e+06	5.89627e+06	Shared	High	High	High	High	41	42.46
FALSE	High	FWEVISDEHGIDPSGN	N			1	2	2	F1S6M7	0	1801.8	0	456198	331256	806881		High	Peak Found	High	High	45	41.95
FALSE	High	FWEVISDEHGIDPSGNYVGDSDLQLER	R			1	2	100	F1S6M7	0	3077.41	0	6.73169e+07	7.31172e+07	9.91939e+07		High	High	High	High	119	46.38
FALSE	High	FWEVISDEHGIDPTGSY	Y			2	6	3	E1BJB1; F2Z5B2	0	1951.87	0	165938	228168	641699	Shared	Peak Found	High	High	High	38	45.85
FALSE	High	FWEVISDEHGIDPTGSYHGDSDLQLER	R			2	6	179	E1BJB1; F2Z5B2	0	3102.41	0	1.06791e+08	1.94432e+08	3.1619e+08	Shared	High	High	High	High	100	42.94
FALSE	High	FWEVISDEHGIDPTGTYHGDSDLQLER	R			2	2	61	F2Z5K5; F2Z571	0	3116.42	0	4.70879e+07	9.0201e+07	1.25697e+08	Shared	High	High	High	High	91	43.18
FALSE	High	GAELVDSVLDVVR	R			6	12	1	E1BJB1; F1S6M7; Q2HJ81; Q767L7; F2Z571; F2Z5B2	0	1371.75	0	293149	166691		Shared	Peak Found	Peak Found	Not Found	High	66	49.84
FALSE	High	GAFSSVSMSGGAGR	R		1xOxidation [M8]	1	1	1	IPI00000004.1	0	1286.58	0	1278779				High	Not Found	Not Found	High	18	20.09
FALSE	High	GAGGGFGSR	R			2	3	1	sp; IPI00000001.1	0	765.364	0	54975.7	68097		Shared	Peak Found	Peak Found	Not Found	High	26	11.66
FALSE	High	GALNVDLTEFQTNLVPYPR	R			7	17	6	F1RK98; Q2HJB8; I3LDR2; P02550; F1SHC1; F1MNF8; F2Z5S8	0	2147.11	0		331652	792547	Shared	Not Found	High	High	High	129	51.43
FALSE	High	GDDSFNTFFSETGAGK	K			5	15	4	F1RK98; P02550; A7E1S5; F1SHC1; F1MNF8	0	1679.72	0	217831	280181	498596	Shared	High	Peak Found	High	High	81	41.98
FALSE	High	GDLNHLVSATMSGVTTSLR	R			3	5	1	F1S6M7; I3LBV1; Q2HJ81	0	1959	0				No Quan Values	Peak Found	Not Found	Peak Found	High	25	57.02
FALSE	High	GDVVPK	K			8	18	114	F1RK98; G5E6J5; Q2HJB8; I3LDR2; P02550; F1SHC1; F1MNF8; F2Z5S8	0	614.351	0	4.5547e+07	2.35113e+08	3.5538e+08	Shared	High	High	High	High	36	11.12
FALSE	High	GDVVPKDVNAAIATIK	K			4	11	11	F1RK98; P02550; F1SHC1; F1MNF8	1	1610.91	0		3.28101e+06	3.6765e+06	Shared	High	High	High	High	79	37.89
FALSE	High	GEHALK	K			2	2	2	IPI00000008.1; sp	0	654.357	0	193737	258437	155051	Shared	Peak Found	Peak Found	Peak Found	High	19	6.67
FALSE	High	GELAIK	K			1	2	20	IPI00000002.1	0	630.382	0	5.46595e+06	10045089	2.79161e+06		High	High	High	High	40	19.05
FALSE	High	GEMALK	K			3	3	5	IPI00000006.1; IPI00000005.1; IPI00000007.1	0	648.339	0	366750	588734	221858	Shared	Peak Found	High	High	High	32	15.1
FALSE	High	GENALK	K			3	4	21	sp; IPI00000001.1; IPI00000004.1	0	631.341	0	567618	1.32674e+06	636642	Shared	High	High	High	High	39	7.82
FALSE	High	GENALKDAK	K			2	3	5	sp; IPI00000001.1	1	945.5	0	501617	437739	71504.1	Shared	High	High	Peak Found	High	56	9.9
FALSE	High	GFGGASGGGY	Y			1	2	3	IPI00000010.1	0	829.348	0	788192	928635	393816		High	Peak Found	Peak Found	High	36	23.73
FALSE	High	GFGGASGGGYSSSGGFGGGFGGGSGGGFGGGYGSGFGGFGGFGGGAGGGDGGILTANEK	K			1	1	2	IPI00000010.1	0	4862.08	0					Not Found	Not Found	Not Found	High	56	52.94
FALSE	High	GFQNALIVR	R			1	1	1	sp	0	1017.58	0	227725		2219964		High	Not Found	Peak Found	High	39	32.54
FALSE	High	GFSANSAR	R			1	1	1	IPI00000005.1	0	809.39	0				No Quan Values	Not Found	Not Found	Not Found	High	34
FALSE	High	GFSCGSAIVGGGK	K		1xCarbamidomethyl [C4]	1	1	1	IPI00000004.1	0	1196.57	0	947915				High	Not Found	Not Found	High	72	25.28
FALSE	High	GFSGGSFSR	R			1	2	1	IPI00000012.1	0	901.416	0					Not Found	Not Found	Not Found	High	37	22.02
FALSE	High	GFSSGSAVVSGGSR	R			2	2	22	IPI00000008.1; sp	0	1254.61	0	2.61599e+07	1.92522e+07	8.39874e+06	Shared	High	High	High	High	85	21.17
FALSE	High	GFSSGSAVVSGGSRR	R			2	2	3	IPI00000008.1; sp	1	1410.71	0	284271			Shared	High	Not Found	Not Found	High	42	18.8
FALSE	High	GFTSLLMER	R		1xOxidation [M7]	7	17	3	Q2HJB8; I3LDR2; P02550; A7E1S5; F1SHC1; F1MNF8; F2Z5S8	0	1069.53	0	123054	237033	289913	Shared	Peak Found	High	High	High	39	37.73
FALSE	High	GFTSLLMER	R			7	17	1	Q2HJB8; I3LDR2; P02550; A7E1S5; F1SHC1; F1MNF8; F2Z5S8	0	1053.54	0				No Quan Values	Not Found	Not Found	High	High	57
FALSE	High	GGFGGFGGGAGGGDGGILTANEK	K			1	1	1	IPI00000010.1	0	1952.91	0					Not Found	Not Found	Not Found	High	38	38.97
FALSE	High	GGFGGGAGGGDGGILTANEK	K			1	2	3	IPI00000010.1	0	1691.8	0	718752				High	Not Found	Not Found	High	85	31
FALSE	High	GGGAGGGDGGILTANEK	K			1	2	1	IPI00000010.1	0	1430.69	0				No Quan Values	Not Found	Not Found	Not Found	High	65
FALSE	High	GGGDDSFNTFFSETGAGK	K			5	14	2	F1RK98; P02550; A7E1S5; F1SHC1; F1MNF8	0	1793.76	0				No Quan Values	Not Found	Not Found	Not Found	High	28
FALSE	High	GGGFGGDGGLLSGNEK	K			1	2	4	IPI00000012.1	0	1421.67	0	972355	456279	2903936		High	High	Peak Found	High	74	31.07
FALSE	High	GGGFGGGFGGDGGLLSGNEK	K			1	2	1	IPI00000012.1	0	1739.8	0					Not Found	Not Found	Not Found	High	75	39.06
FALSE	High	GGGFGGGSGFGGGSGF	F			1	1	1	sp	0	1261.52	0	204010				Peak Found	Not Found	Not Found	High	16	39.5
FALSE	High	GGGFGGGSGFGGGSGFGGGSGFSGGGFGGGGFGGGR	R			1	1	8	sp	0	2831.19	0	3.48715e+06	2.48455e+06	566092		High	High	High	High	141	45.21
FALSE	High	GGGFGGGSSFGGGSGFSGGGFGGGGFGGGR	R			1	1	11	IPI00000008.1	0	2399.02	1	1.57989e+06	3.63674e+06	1.72946e+06		High	High	High	High	179	41.91
FALSE	High	GGGFSSGGFSGGSFSR	R			1	2	5	IPI00000012.1	0	1450.63	0	1.9079e+06	1.57225e+06	449927		High	High	High	High	73	31.88
FALSE	High	GGGGGFGAAGGFGGR	R			2	2	3	IPI00000008.1; sp	0	1181.54	0				Shared	Not Found	Not Found	Not Found	High	51	26.7
FALSE	High	GGGGGGGLGSGGSIR	R			1	2	7	IPI00000010.1	0	1145.57	0	1705150	1.96817e+06	799598		High	High	High	High	64	17.31
FALSE	High	GGGGGGLGSGGSIR	R			1	2	4	IPI00000010.1	0	1088.54	0	140372	172019	81094.3		High	High	High	High	47	17.2
FALSE	High	GGGGGGYGSGGSSYGSGGGSYGSGGGGGGGR	R			2	3	18	sp; IPI00000001.1	0	2383.95	0	4.42067e+06	5224822	2.04034e+06	Shared	High	High	High	High	165	18.27
FALSE	High	GGGGGSFGAGGGFGSR	R			2	3	5	sp; IPI00000001.1	0	1284.57	0	301807	660843		Shared	High	High	Not Found	High	71	24.56
FALSE	High	GGGGSFGYSYGGGSGGGF	F			1	2	3	IPI00000010.1	0	1527.61	0	241890	352672			High	High	Not Found	High	30	37.81
FALSE	High	GGGGSFGYSYGGGSGGGFSASSLGGGFGGGSR	R			1	2	24	IPI00000010.1	0	2705.16	0	8882828	13911722	3.63566e+06		High	High	High	High	173	41.62
FALSE	High	GGGLGSGGSIR	R			1	2	1	IPI00000010.1	0	917.48	0					Not Found	Not Found	Not Found	High	21	16.99
FALSE	High	GGGLSVSSR	R			1	1	1	IPI00000013.1	0	819.432	0					Not Found	Not Found	Not Found	High	28	15.12
FALSE	High	GGGLSVSSSR	R			1	1	2	IPI00000011.1	0	906.464	0				No Quan Values	Peak Found	High	Peak Found	High	36	14.85
FALSE	High	GGGSGFSGGGFGGGGFGGGR	R			2	2	1	IPI00000008.1; sp	0	1588.69	0				Shared	Not Found	Not Found	Not Found	High	88	32.73
FALSE	High	GGGSGGGFSASSLGGGFGGGSR	R			1	2	2	IPI00000010.1	0	1772.79	0	131300				High	Not Found	Not Found	High	97	34.19
FALSE	High	GGGTGSGFTSLLMER	R		1xOxidation [M13]	7	17	15	Q2HJB8; I3LDR2; P02550; A7E1S5; F1SHC1; F1MNF8; F2Z5S8	0	1485.7	0	3842068	8.22497e+06	2.29963e+07	Shared	High	High	High	High	76	39.51
FALSE	High	GGGTGSGFTSLLMER	R			7	17	2	Q2HJB8; I3LDR2; P02550; A7E1S5; F1SHC1; F1MNF8; F2Z5S8	0	1469.71	0			8011209	Shared	Not Found	Not Found	High	High	102	42.89
FALSE	High	GGILTANEK	K			1	2	1	IPI00000010.1	0	902.494	0	165124	216201			Peak Found	Peak Found	Not Found	High	27	19.25
FALSE	High	GGLGGFGGGSFR	R			1	1	2	IPI00000012.1	0	1068.52	0	472446	439912			High	Peak Found	Not Found	High	40	33.72
FALSE	High	GGLLSGNEK	K			2	3	3	IPI00000012.1; sp	0	874.463	0	136455	170944		Shared	High	Peak Found	Not Found	High	31	18.73
FALSE	High	GGSGGGGSISGGGYGSGGGSGGR	R			2	2	5	IPI00000008.1; sp	0	1741.75	0	341914	367311	146244	Shared	High	High	Peak Found	High	105	15.25
FALSE	High	GGSGGSHGGGSGFGGE	E			1	2	1	IPI00000010.1	0	1263.5	0				No Quan Values	Not Found	Not Found	Not Found	High	58
FALSE	High	GGSGGSHGGGSGFGGESGGSY	Y			1	2	1	IPI00000010.1	0	1714.67	0					Not Found	Not Found	Not Found	High	45	20.22
FALSE	High	GGSGGSHGGGSGFGGESGGSYGGGEEASGSGGGYGGGSGK	K			1	2	8	IPI00000010.1	0	3223.28	0	1.66697e+06	2.56067e+06	906651		High	High	High	High	145	21.23
FALSE	High	GGSGGSYGGGGSGGGYGGGSGSR	R			1	2	23	IPI00000010.1	0	1791.73	0	2.35671e+06	2.94307e+06	1.06298e+06		High	High	High	High	124	13.7
FALSE	High	GGSGGSYGGGSGSGGGSGGGYGGGSGGGHSGGSGGGHSGGSGGNYGGGSGSGGGSGGGYGGGSGSR	R			1	2	2	IPI00000010.1	0	4972.94	0				No Quan Values	Not Found	Not Found	Not Found	High	64
FALSE	High	GGSGGSYGR	R			1	2	4	IPI00000010.1	0	797.354	0	154195	324814	70372.9		Peak Found	High	Peak Found	High	31	6.62
FALSE	High	GGSISGGGYGSGGGK	K			2	2	12	IPI00000008.1; sp	0	1197.55	0	5.40434e+06	3.60954e+06	1.47996e+06	Shared	High	High	High	High	84	13.55
FALSE	High	GGSSGGYGGLGGFGGGSFR	R			1	1	1	IPI00000012.1	0	1633.74	0				No Quan Values	Not Found	Not Found	Not Found	High	99
FALSE	High	GGSSSGGGYGSGGGGSSSVK	K			2	2	4	IPI00000008.1; sp	0	1588.68	0	204785	239501		Shared	High	Peak Found	Not Found	High	95	11
FALSE	High	GGTGSGFTSLLMER	R		1xOxidation [M12]	7	17	1	Q2HJB8; I3LDR2; P02550; A7E1S5; F1SHC1; F1MNF8; F2Z5S8	0	1428.68	0		338962		Shared	Not Found	Peak Found	Not Found	High	67	39.53
FALSE	High	GGTGSGMGTLLISK	K			8	15	1	E1BJB1; F2Z5K5; F1S6M7; I3LBV1; Q2HJ81; Q767L7; F2Z571; F2Z5B2	0	1278.67	0				No Quan Values	Not Found	Not Found	High	High	27
FALSE	High	GHLFRPDNFIFGQSGAGNNWAK	K			1	2	5	F1S6M7	0	2433.18	0	367788		927994		High	Not Found	High	High	74	42.92
FALSE	High	GHYTEGAELMDSVLDVVR	R		1xOxidation [M10]	1	2	1	I3LBV1	0	2006.95	0					Not Found	Not Found	Not Found	High	34	52.12
FALSE	High	GHYTEGAELMDSVLDVVR	R			1	2	17	I3LBV1	0	1990.95	0	251346	1.49058e+06	1.17463e+06		High	High	High	High	76	52.5
FALSE	High	GHYTEGAELVD	D			7	13	5	E1BJB1; F2Z5K5; F1S6M7; Q2HJ81; Q767L7; F2Z571; F2Z5B2	0	1190.53	0	471492	574432	1.2993e+06	Shared	High	High	High	High	56	24.47
FALSE	High	GHYTEGAELVDAVLDVVR	R			1	1	37	F2Z5K5	0	1942.99	0	3.26546e+07	4.9206e+07	7.72898e+07		High	High	High	High	113	56.96
FALSE	High	GHYTEGAELVDSVL	L			6	12	1	E1BJB1; F1S6M7; Q2HJ81; Q767L7; F2Z571; F2Z5B2	0	1489.72	0				No Quan Values	High	Not Found	Not Found	High	69
FALSE	High	GHYTEGAELVDSVLD	D			6	12	1	E1BJB1; F1S6M7; Q2HJ81; Q767L7; F2Z571; F2Z5B2	0	1604.74	0				No Quan Values	High	Not Found	Not Found	High	63
FALSE	High	GHYTEGAELVDSVLDVVR	R			6	12	201	E1BJB1; F1S6M7; Q2HJ81; Q767L7; F2Z571; F2Z5B2	0	1958.98	2	4.40667e+08	4.41785e+08	9.73033e+08	Shared	High	High	High	High	126	52.29
FALSE	High	GHYTEGAELVDSVLDVVRK	K			6	12	6	E1BJB1; F1S6M7; Q2HJ81; Q767L7; F2Z571; F2Z5B2	1	2087.08	2	3.79853e+06	6918162	6.77871e+06	Shared	Peak Found	High	Peak Found	High	86	49.62
FALSE	High	GHYTEGAELVDSVLDVVRKEC	C		1xCarbamidomethyl [C21]	2	4	1	F1S6M7; Q2HJ81	2	2376.15	0				Not Reliable	High	Not Found	Not Found	High	15
FALSE	High	GHYTIGK	K			6	17	80	F1RK98; P02550; A7E1S5; F1SHC1; F1MNF8; F2Z5S8	0	775.41	0	1.80616e+08	4.09668e+08	4.0427e+08	Shared	High	High	High	High	42	12.62
FALSE	High	GHYTIGKEIIDLVLDR	R			4	13	6	P02550; A7E1S5; F1SHC1; F1MNF8	1	1842.01	0	72852.7	208595		Shared	Peak Found	High	Not Found	High	70	54.54
FALSE	High	GHYTVGK	K			2	3	3	Q2HJB8; I3LDR2	0	761.394	1	333823		400939	Shared	Peak Found	Not Found	High	High	19	9.79
FALSE	High	GIQPDGQMPSDK	K		1xOxidation [M8]	6	15	3	F1RK98; P02550; A7E1S5; F1SHC1; F1MNF8; F2Z5S8	0	1288.58	0		75646.5	128086	Shared	Not Found	Peak Found	High	High	49	14.29
FALSE	High	GIQPDGQMPSDK	K			6	15	5	F1RK98; P02550; A7E1S5; F1SHC1; F1MNF8; F2Z5S8	0	1272.59	0		1.23754e+06	6.47423e+06	Shared	Not Found	High	Peak Found	High	46	20.72
FALSE	High	GLIGSVEEQLAQLR	R			1	1	1	IPI00000013.1	0	1512.84	0					Not Found	Not Found	Not Found	High	87	53.35
FALSE	High	GMGTLLISK	K			8	15	1	E1BJB1; F2Z5K5; F1S6M7; I3LBV1; Q2HJ81; Q767L7; F2Z571; F2Z5B2	0	919.528	0			1.12525e+06	Shared	Not Found	Not Found	Peak Found	High	25	33.04
FALSE	High	GMQDLVEDFK	K		1xOxidation [M2]	1	1	4	IPI00000005.1	0	1197.55	1	998030	1.12833e+06			High	High	Not Found	High	61	32.4
FALSE	High	GNTLDNDIMLIK	K		1xOxidation [M9]	1	1	2	sp	0	1362.69	0				No Quan Values	Not Found	Not Found	Not Found	High	75
FALSE	High	GNYVGDSDLQLER	R			1	2	5	F1S6M7	0	1465.69	0	408996		5628530		High	High	High	High	85	33.67
FALSE	High	GPAAIQK	K			1	2	29	IPI00000010.1	0	684.404	0	5.01327e+06	15996930	2.8096e+06		High	High	High	High	50	9.79
FALSE	High	GPFPII	I			1	1	2	sp	0	643.381	0	90451.4	639643			Peak Found	High	Not Found	High	22	47.99
FALSE	High	GPFPIIV	V			1	1	7	sp	0	742.45	0	3504434	32003976	917380		High	High	High	High	36	50.86
FALSE	High	GPTSGPSLLLLLLTHLP	P		1xAcetyl [N-Term]	1	1	1	sp	0	1771.04	0				No Quan Values	High	Not Found	Not Found	High	14
FALSE	High	GQIFRPDNFVFGQSGAGNNWAK	K			5	9	4	E1BJB1; F2Z5K5; Q767L7; F2Z571; F2Z5B2	0	2410.17	0	650809	900836	2.0145e+06	Shared	High	High	Peak Found	High	71	43.54
FALSE	High	GQLNADLR	R			10	16	29	A5GFX6; E1BJB1; F2Z5K5; F1S6M7; I3LBV1; Q2HJ81; E1BJK2; Q767L7; F2Z571; F2Z5B2	0	886.474	0	2.64787e+07	39977206	98964397	Shared	High	High	High	High	54	20.21
FALSE	High	GQLNADLRK	K			10	16	11	A5GFX6; E1BJB1; F2Z5K5; F1S6M7; I3LBV1; Q2HJ81; E1BJK2; Q767L7; F2Z571; F2Z5B2	1	1014.57	0	9.73118e+06	23798051	17560008	Shared	High	High	High	High	45	16.62
FALSE	High	GQSGAGNNWAK	K			6	11	5	E1BJB1; F2Z5K5; F1S6M7; Q767L7; F2Z571; F2Z5B2	0	1089.51	0	177834	228381	646754	Shared	High	High	High	High	40	13.9
FALSE	High	GQTGGDVNVEMDAAPGVDLSR	R		1xOxidation [M11]	1	1	4	IPI00000013.1	0	2103.96	0	414245	568684			High	High	Not Found	High	113	31.03
FALSE	High	GQTGGDVNVEMDAAPGVDLSR	R			1	1	3	IPI00000013.1	0	2087.97	0		450804			Not Found	High	Not Found	High	112	35.3
FALSE	High	GQVGGDVNVEMDAAPGVDLSR	R		1xOxidation [M11]	1	1	8	IPI00000011.1	0	2101.98	0	1.03922e+06	1.29083e+06			High	High	Not Found	High	122	32.89
FALSE	High	GQVGGDVNVEMDAAPGVDLSR	R			1	1	1	IPI00000011.1	0	2085.99	0	200341	450890			Peak Found	Peak Found	Not Found	High	68	36.98
FALSE	High	GRGGGGGGFRG	G			2	2	1	IPI00000008.1; sp	2	934.46	0		204533		Shared	Not Found	High	Not Found	High	22	9.46
FALSE	High	GRLDSELR	R			1	1	9	IPI00000005.1	1	945.511	0	8.05436e+06	8.66137e+06	2.37255e+06		High	High	High	High	39	18.31
FALSE	High	GSCGIGGGIGGGSSR	R		1xCarbamidomethyl [C3]	2	2	5	IPI00000011.1; IPI00000013.1	0	1278.59	0	715161	1.71535e+06		Shared	High	High	Not Found	High	67	19.17
FALSE	High	GSGFGGGSGFGGGSGFSGGGFGGGGFGGGR	R			1	1	1	sp	0	2399.02	0				No Quan Values	High	Peak Found	Peak Found	High	27	41.91
FALSE	High	GSGGGSSGGSIGGR	R			2	3	27	sp; IPI00000001.1	0	1092.5	0	2.0361e+06	7007198	3.3809e+06	Shared	High	High	High	High	97	8.34
FALSE	High	GSGGLGGACGGAGFGSR	R		1xCarbamidomethyl [C9]	1	1	7	IPI00000005.1	0	1424.63	0	1.13746e+06	1.44197e+06	459227		High	High	High	High	96	24
FALSE	High	GSLGGGF	F			1	2	5	IPI00000012.1	0	594.288	0	1822073	2.03222e+06	922044		High	High	High	High	30	28.4
FALSE	High	GSLGGGFSSGGF	F			1	2	4	IPI00000012.1	0	1029.46	0	1.71533e+06	1.08884e+06	456821		High	High	High	High	51	38.83
FALSE	High	GSLGGGFSSGGFSGGSFSR	R			1	2	36	IPI00000012.1	0	1707.77	0	3.69592e+07	2.75176e+07	6795969		High	High	High	High	118	36.96
FALSE	High	GSQQYR	R			10	16	13	A5GFX6; E1BJB1; F2Z5K5; F1S6M7; I3LBV1; Q2HJ81; E1BJK2; Q767L7; F2Z571; F2Z5B2	0	738.353	0	865658	3.86889e+06	1.01691e+07	Shared	High	High	High	High	25	6.75
FALSE	High	GSRGGSGGSYGGGGSGGGYGGGSGSR	R			1	2	1	IPI00000010.1	1	2091.88	0					Not Found	Not Found	Not Found	High	87	12.43
FALSE	High	GSSGGGCFGGSSGGYGGLGGFGGGSFR	R		1xCarbamidomethyl [C7]	1	1	7	IPI00000012.1	0	2342.98	0	3582484	4.47053e+06	2.0664e+06		High	High	High	High	170	40.75
FALSE	High	GSSSGGGYSSGSSSYGSGGR	R			2	2	7	IPI00000008.1; sp	0	1740.71	0	1.45962e+06	1.49949e+06	385709	Shared	High	High	High	High	104	14.06
FALSE	High	GSYGSGGSSYGSGGGSYGSGGGGGGHGSYGSGSSSGGYR	R			2	3	9	sp; IPI00000001.1	0	3312.31	0	1.71328e+06	2105977	718445	Shared	High	High	High	High	127	21.42
FALSE	High	GSYGSGSSSGGYR	R			2	3	1	sp; IPI00000001.1	0	1221.51	0				No Quan Values	Not Found	Not Found	Not Found	High	50
FALSE	High	GSYHGDSDLQLER	R			2	6	5	E1BJB1; F2Z5B2	0	1476.67	0	553011	446769	2.0154e+06	Shared	High	Peak Found	High	High	52	22.77
FALSE	High	GTFATLSELHCDK	K		1xCarbamidomethyl [C11]	1	1	1	sp	0	1478.69	0		218436			Not Found	High	Not Found	High	50	31.53
FALSE	High	GTGSGFTSLLMER	R		1xOxidation [M11]	7	17	3	Q2HJB8; I3LDR2; P02550; A7E1S5; F1SHC1; F1MNF8; F2Z5S8	0	1371.66	0		382871	435072	Shared	Not Found	Peak Found	High	High	65	39.41
FALSE	High	GTGSGFTSLLMER	R			7	17	1	Q2HJB8; I3LDR2; P02550; A7E1S5; F1SHC1; F1MNF8; F2Z5S8	0	1355.66	0			266398	Shared	Not Found	Not Found	Peak Found	High	66	42.9
FALSE	High	GTGSGMGTLLISK	K			8	15	1	E1BJB1; F2Z5K5; F1S6M7; I3LBV1; Q2HJ81; Q767L7; F2Z571; F2Z5B2	0	1221.65	0			1082130	Shared	Not Found	Not Found	High	High	98	33.89
FALSE	High	GTGTADA	A			1	1	1	IPI00000014.1	0	592.257	0				No Quan Values	Not Found	Not Found	Not Found	High	14
FALSE	High	GTLLISK	K			8	15	3	E1BJB1; F2Z5K5; F1S6M7; I3LBV1; Q2HJ81; Q767L7; F2Z571; F2Z5B2	0	731.466	0	1.62363e+06	2.0388e+06	6.80991e+06	Shared	Peak Found	Peak Found	High	High	30	24.08
FALSE	High	GVTTCLR	R		1xCarbamidomethyl [C5]	5	9	4	E1BJB1; F2Z5K5; Q767L7; F2Z571; F2Z5B2	0	806.419	0	123938	250446	316003	Shared	Peak Found	High	High	High	31	17.42
FALSE	High	GVTTSLR	R			4	6	1	A5GFX6; F1S6M7; I3LBV1; Q2HJ81	0	733.42	0				Shared	Not Found	Not Found	Not Found	High	15	16.42
FALSE	High	GYIDSLKR	R			2	2	1	IPI00000008.1; sp	1	951.526	0				Shared	Not Found	Not Found	Not Found	High	24	23.02
FALSE	High	GYYTEGAELVDR	R			1	1	1	E1BJK2	0	1372.64	0	254259				High	Not Found	Not Found	High	59	31.92
FALSE	High	HGDDLR	R			4	5	1	IPI00000006.1; IPI00000005.1; IPI00000007.1; IPI00000002.1	0	712.337	0	43916.6	99097.6	43766.1	Shared	Peak Found	Peak Found	Peak Found	High	22	7.29
FALSE	High	HGDSDLQLER	R			4	8	9	E1BJB1; F2Z5K5; F2Z571; F2Z5B2	0	1169.55	0				Shared	High	High	High	High	64	19.06
FALSE	High	HGDSLKEIK	K			2	2	4	IPI00000008.1; sp	1	1026.56	0	383699	175894		Shared	Peak Found	Peak Found	Not Found	High	35	13.4
FALSE	High	HGDSVR	R			2	3	1	sp; IPI00000001.1	0	670.327	0	139929			Shared	Peak Found	Not Found	Not Found	High	18	5.9
FALSE	High	HGGGGG	G			2	2	10	IPI00000008.1; sp	0	441.184	0	992598	2.4129e+06	2.16451e+06	Shared	High	High	High	High	15	12.63
FALSE	High	HGGGGGGFGGGGFGS	S			2	2	7	IPI00000008.1; sp	0	1164.48	0	684544	742962	404802	Shared	High	High	High	High	49	24.52
FALSE	High	HGGGGGGFGGGGFGSR	R			2	2	33	IPI00000008.1; sp	0	1320.58	0	2.34222e+07	1.57116e+07	12022186	Shared	High	High	High	High	107	20.84
FALSE	High	HGIDPTGSYHGDSDLQLER	R			2	6	1	E1BJB1; F2Z5B2	0	2096.96	0				No Quan Values	High	Not Found	Not Found	High	26
FALSE	High	HGIQPDGQMPSDK	K			6	15	6	F1RK98; P02550; A7E1S5; F1SHC1; F1MNF8; F2Z5S8	0	1409.65	0	1.12388e+06	749427		Shared	High	High	High	High	52	18.72
FALSE	High	HGKYMACCLLYR	R		2xCarbamidomethyl [C7; C8]	4	11	3	P02550; F1SHC1; F1MNF8; F2Z5S8	1	1571.73	0		113043	552388	Shared	Not Found	Peak Found	High	High	65	29.66
FALSE	High	HGRYLTVAAIFRGR	R			2	2	1	E1BJB1; F2Z5B2	2	1616.91	0				No Quan Values	Not Found	Not Found	Not Found	High	25
FALSE	High	HGVQEL	L			1	2	1	IPI00000010.1	0	682.352	0					Not Found	Not Found	Not Found	High	31	16.71
FALSE	High	HGVQELEIELQ	Q			1	2	1	IPI00000010.1	0	1294.66	0	132288				Peak Found	Not Found	Not Found	High	52	37.62
FALSE	High	HGVQELEIELQSQ	Q			1	2	1	IPI00000010.1	0	1509.75	0					Not Found	Not Found	Not Found	High	77	36.89
FALSE	High	HGVQELEIELQSQL	L			1	2	1	IPI00000010.1	0	1622.84	0	196017				Peak Found	Not Found	Not Found	High	54	46.61
FALSE	High	HGVQELEIELQSQLSK	K			1	2	26	IPI00000010.1	0	1837.97	0	2.27879e+07	3.50849e+07	7.68381e+06		High	High	High	High	121	43.38
FALSE	High	HGVQELEIELQSQLSKK	K			1	2	6	IPI00000010.1	1	1966.06	0	908162	1241326			High	High	High	High	78	41.49
FALSE	High	HGVQELEIELQSQLSKKAALEK	K			1	2	8	IPI00000010.1	2	2478.36	0	1.71174e+06	5.17321e+06	804379		High	High	Peak Found	High	87	42.31
FALSE	High	HIQKEDVPSER	R			1	1	8	sp	1	1337.68	0	418835	3.00693e+06			High	High	Not Found	High	67	13.34
FALSE	High	HKEMPFPK	K		1xOxidation [M4]	1	1	1	sp	1	1029.52	0		571403			Not Found	Peak Found	Not Found	High	17	12.52
FALSE	High	HLFHPEQLITGK	K			1	1	12	Q2HJB8	0	1419.77	0	4.98093e+06	811560	3.72537e+06		High	High	Peak Found	High	58	49.2
FALSE	High	HLFHPEQLITGKEDAANNYAR	R			1	1	1	Q2HJB8	1	2424.21	0					Not Found	Not Found	Not Found	High	48	46.14
FALSE	High	HLVDEPQNLIK	K			1	1	1	sp	0	1305.72	0	186355	406273			Peak Found	High	Not Found	High	35	30.27
FALSE	High	HLVSATMSGVTTCLR	R		1xCarbamidomethyl [C13]; 1xOxidation [M7]	5	9	1	E1BJB1; F2Z5K5; Q767L7; F2Z571; F2Z5B2	0	1648.81	0				Shared	Not Found	Not Found	Not Found	High	18	26.48
FALSE	High	HLVSATMSGVTTCLR	R		1xCarbamidomethyl [C13]	5	9	6	E1BJB1; F2Z5K5; Q767L7; F2Z571; F2Z5B2	0	1632.82	0		414484	3.20077e+06	Shared	Not Found	High	High	High	80	33.17
FALSE	High	HLVSATMSGVTTSLR	R			3	5	5	F1S6M7; I3LBV1; Q2HJ81	0	1559.82	0	145684		2.17294e+06	Shared	Peak Found	Not Found	High	High	74	32.99
FALSE	High	HNLLEGGQEDFESSGAGK	K			1	2	3	IPI00000010.1	0	1874.85	0	268980				Peak Found	Not Found	Not Found	High	99	30.16
FALSE	High	HQGLPQEVLNENLLR	R			1	1	11	sp	0	1759.94	0	1.83264e+06	16503944	260141		High	High	Peak Found	High	82	39.81
FALSE	High	HSFGGGTGSGFTSLLMER	R		1xOxidation [M16]	7	17	38	Q2HJB8; I3LDR2; P02550; A7E1S5; F1SHC1; F1MNF8; F2Z5S8	0	1856.86	0	1.77334e+07	3.60126e+07	1.13756e+08	Shared	High	High	High	High	132	39.65
FALSE	High	HSFGGGTGSGFTSLLMER	R			7	17	8	Q2HJB8; I3LDR2; P02550; A7E1S5; F1SHC1; F1MNF8; F2Z5S8	0	1840.86	0		1047226	36292336	Shared	Not Found	High	High	High	128	42.49
FALSE	High	HSLGGGTGSGMGTLLISK	K		1xOxidation [M11]	8	15	2	E1BJB1; F2Z5K5; F1S6M7; I3LBV1; Q2HJ81; Q767L7; F2Z571; F2Z5B2	0	1688.86	0	378293		260061	Shared	Peak Found	Not Found	High	High	46	27.46
FALSE	High	HSLGGGTGSGMGTLLISK	K			8	15	6	E1BJB1; F2Z5K5; F1S6M7; I3LBV1; Q2HJ81; Q767L7; F2Z571; F2Z5B2	0	1672.87	0	163390	261683	2.98468e+06	Shared	Peak Found	High	High	High	71	34.11
FALSE	High	HVEIDPEIQK	K			1	1	1	IPI00000004.1	0	1207.63	0	507472				High	Not Found	Not Found	High	33	23.75
FALSE	High	HYTEGAELVDSVLDVVR	R			6	12	5	E1BJB1; F1S6M7; Q2HJ81; Q767L7; F2Z571; F2Z5B2	0	1901.96	0	199945			Shared	High	High	High	High	92	52.53
FALSE	High	IAEAEQR	R			1	1	1	IPI00000007.1	0	816.421	0					Not Found	Not Found	Not Found	High	26	9.46
FALSE	High	IAEAWAR	R			7	15	8	F1RK98; Q2HJB8; I3LDR2; P02550; F1SHC1; F1MNF8; F2Z5S8	0	816.436	0	981342	3.08085e+06	1.33665e+07	Shared	High	High	High	High	50	23.18
FALSE	High	IDNEALYDICFR	R		1xCarbamidomethyl [C10]	9	15	1	E1BJB1; F2Z5K5; F1S6M7; I3LBV1; Q2HJ81; E1BJK2; Q767L7; F2Z571; F2Z5B2	0	1528.71	0				Shared	Not Found	Not Found	Not Found	High	76	42.63
FALSE	High	IDNNIEQISSYK	K			1	2	1	IPI00000012.1	0	1423.71	0	124998				Peak Found	Not Found	Not Found	High	80	30.63
FALSE	High	IDNVKK	K			2	3	1	sp; IPI00000001.1	1	716.43	0	76590.6	153875		Shared	Peak Found	Peak Found	Not Found	High	27	11.84
FALSE	High	IDPEIQK	K			3	4	1	sp; IPI00000001.1; IPI00000004.1	0	842.462	0	87089.4	119518		Shared	Peak Found	Peak Found	Not Found	High	16	17.6
FALSE	High	IDPVLDR	R			1	1	1	F2Z5S8	0	827.462	0					Not Found	Not Found	Not Found	High	21	34.75
FALSE	High	IDVLEGNEQFINAAK	K			1	1	1	sp	0	1660.85	0	631739		847333		Peak Found	Not Found	High	High	40	39.84
FALSE	High	IEISELNR	R			4	5	25	sp; IPI00000008.1; IPI00000001.1; sp	0	973.531	0	1.16732e+08	139612372	4.96762e+07	Shared	High	High	High	High	67	28.22
FALSE	High	IERPTYTNLNR	R			6	17	4	F1RK98; Q2HJB8; I3LDR2; P02550; F1SHC1; F2Z5S8	0	1376.73	0	91040.3	557925	843653	Shared	Peak Found	Peak Found	High	High	50	22.69
FALSE	High	IFGQSGAGNNWAK	K			1	2	3	F1S6M7	0	1349.66	0	4642654	3952926	5.68022e+06		High	High	Peak Found	High	87	30.57
FALSE	High	IFRPDNFVFGQSGAGNNWAK	K			5	9	9	E1BJB1; F2Z5K5; Q767L7; F2Z571; F2Z5B2	0	2225.09	0	4.50424e+06	5.98818e+06	1.51423e+07	Shared	High	High	High	High	104	42.8
FALSE	High	IGLGGR	R			1	2	2	IPI00000010.1	0	572.351	0	17980522	26771754	4329477		Peak Found	Peak Found	Peak Found	High	26	16.45
FALSE	High	IGLGGRGGSGGSYGR	R			1	2	5	IPI00000010.1	1	1350.69	0	279635	592838	827177		Peak Found	High	Peak Found	High	25	19.07
FALSE	High	IGNSTAIQELFK	K			8	11	12	E1BJB1; F2Z5K5; F1S6M7; I3LBV1; Q2HJ81; Q767L7; F2Z571; F2Z5B2	0	1320.72	0	2.58423e+07	3.08908e+07	106818617	Shared	High	High	High	High	109	43.04
FALSE	High	IGNSTAIQELFKR	R			8	11	1	E1BJB1; F2Z5K5; F1S6M7; I3LBV1; Q2HJ81; Q767L7; F2Z571; F2Z5B2	1	1476.82	0	134031	154785	103898	Shared	Peak Found	Peak Found	Peak Found	High	41	39.16
FALSE	High	IGVNQELAYFYPELFR	R			1	1	4	sp	0	1959	0	196158	614878			High	High	Peak Found	High	57	57.17
FALSE	High	IHFPLA	A			4	13	1	F1RK98; F1SHC1; F1MNF8; F2Z5S8	0	697.403	0	47104.8		200754	Shared	Peak Found	Not Found	Peak Found	High	23	37.58
FALSE	High	IHFPLAT	T			4	13	15	F1RK98; F1SHC1; F1MNF8; F2Z5S8	0	798.451	0	5.11762e+06	14826398	2.76216e+07	Shared	High	High	High	High	36	37.24
FALSE	High	IHFPLATYAPVISA	A			4	13	2	F1RK98; F1SHC1; F1MNF8; F2Z5S8	0	1499.83	0		72613.2	216908	Shared	Not Found	Peak Found	High	High	52	49.64
FALSE	High	IHFPLATYAPVISAEK	K			4	13	299	F1RK98; F1SHC1; F1MNF8; F2Z5S8	0	1756.96	0	173225844	6.38065e+08	9.4851e+08	Shared	High	High	High	High	83	44
FALSE	High	IHFPLVTYAPIISAEK	K			2	3	10	Q2HJB8; I3LDR2	0	1799.01	0	2.11019e+06	712765	2.58172e+06	Shared	High	High	High	High	77	48.05
FALSE	High	IHPFAQTQSLVYPFPGPIPN	N			1	1	6	sp	0	2223.16	0	358083	2.92933e+06			High	High	Not Found	High	53	49.95
FALSE	High	IIAATIENAQPILQIDNAR	R			1	1	10	IPI00000013.1	0	2064.14	0	1.09567e+06	5504935			High	High	Not Found	High	128	43.74
FALSE	High	IISTTTLNK	K			1	1	1	IPI00000004.1	0	990.583	0	569775				High	Not Found	Not Found	High	18	21.54
FALSE	High	IITHPN	N			1	1	3	sp	0	694.388	0	2.52979e+06	1.29444e+06	4.88144e+06		Peak Found	Peak Found	High	High	37	12.37
FALSE	High	IITHPNFN	N			1	1	4	sp	0	955.5	0	1.90348e+06	1.18739e+06	2.71575e+06		High	Peak Found	Peak Found	High	51	25.16
FALSE	High	IITHPNFNGN	N			1	1	4	sp	0	1126.56	0	10644836	5036710	11069531		Peak Found	High	High	High	33	24.56
FALSE	High	IITHPNFNGNTLDNDIM	M		1xOxidation [M17]	1	1	2	sp	0	1944.91	0				No Quan Values	Not Found	High	Not Found	High	24
FALSE	High	IITHPNFNGNTLDNDIML	L		1xOxidation [M17]	1	1	3	sp	0	2058	0	1.19348e+06				High	High	Not Found	High	115	43.6
FALSE	High	IITHPNFNGNTLDNDIMLIK	K		1xOxidation [M17]	1	1	24	sp	0	2299.18	0	124090834	9.43034e+07	117189246		High	High	High	High	84	43.14
FALSE	High	IITHPNFNGNTLDNDIMLIK	K			1	1	9	sp	0	2283.18	0	257387	828297	6.92354e+06		Peak Found	High	High	High	77	45.63
FALSE	High	IITHPNFNGNTLDNDIMLIKLSSPATLNSR	R		1xOxidation [M17]	1	1	1	sp	1	3325.72	0				No Quan Values	High	Not Found	Not Found	High	25
FALSE	High	IKEWYEK	K			1	2	15	IPI00000012.1	1	995.52	0	7.77009e+07	6.81533e+07	2.85407e+07		High	High	High	High	34	22.05
FALSE	High	IKFEMEQNLR	R		1xOxidation [M5]	1	2	58	IPI00000010.1	1	1323.67	0	1.54175e+07	1.71375e+07	5.17508e+06		High	High	High	High	64	24.19
FALSE	High	IKFEMEQNLR	R			1	2	17	IPI00000010.1	1	1307.68	0	7829744	1.92736e+07	6.89456e+06		High	High	High	High	56	31.3
FALSE	High	ILLDVK	K			2	2	16	IPI00000011.1; IPI00000013.1	0	700.46	0	8.78091e+06	1.56198e+07	4.19798e+06	Shared	High	High	High	High	44	29.59
FALSE	High	ILLQIDNAR	R			2	3	18	IPI00000012.1; IPI00000014.1	0	1055.62	0	5.79219e+06	6.77039e+06	2.63025e+06	Shared	High	High	High	High	59	33.29
FALSE	High	ILNEMR	R		1xOxidation [M5]	2	2	5	IPI00000011.1; IPI00000013.1	0	791.408	0	7737350	2.03073e+07	2.15128e+07	Shared	Peak Found	Peak Found	Peak Found	High	37	12.62
FALSE	High	ILNEMR	R			2	2	5	IPI00000011.1; IPI00000013.1	0	775.413	0	2.85197e+06	15889420	3.48795e+06	Shared	Peak Found	High	Peak Found	High	34	19.55
FALSE	High	ILNEMRDQYEK	K		1xOxidation [M5]	1	1	2	IPI00000011.1	1	1454.69	0					Not Found	Not Found	Not Found	High	50	17.22
FALSE	High	ILNEMRDQYEK	K			1	1	1	IPI00000011.1	1	1438.7	0					Not Found	Not Found	Not Found	High	46	23.75
FALSE	High	ILTATVDNANVLLQIDNAR	R			1	1	10	IPI00000011.1	0	2054.12	0	2.50506e+06	4.29876e+06			High	High	Not Found	High	93	46.28
FALSE	High	IMNTFSVMPSPK	K		2xOxidation [M2; M8]	4	9	168	E1BJB1; I3LBV1; Q2HJ81; F2Z5B2	0	1383.66	0	7.23512e+07	7.98184e+07	4.93232e+07	Shared	High	High	High	High	79	26.7
FALSE	High	IMNTFSVMPSPK	K		1xOxidation [M]	4	9	133	E1BJB1; I3LBV1; Q2HJ81; F2Z5B2	0	1367.67	0	46413932	1.29099e+08	1.82145e+08	Shared	High	High	High	High	92	33.86
FALSE	High	IMNTFSVMPSPK	K			4	9	22	E1BJB1; I3LBV1; Q2HJ81; F2Z5B2	0	1351.67	0	933811	9.18226e+06	69168991	Shared	High	High	High	High	93	37.57
FALSE	High	IMNTFSVVPSPK	K		1xOxidation [M2]	4	6	156	F2Z5K5; F1S6M7; Q767L7; F2Z571	0	1335.7	0	2.30627e+08	2.11712e+08	1.64362e+08	Shared	High	High	High	High	86	32.95
FALSE	High	IMNTFSVVPSPK	K			4	6	23	F2Z5K5; F1S6M7; Q767L7; F2Z571	0	1319.7	0	1.40203e+07	6.80516e+07	3.35851e+08	Shared	High	High	High	High	79	36.97
FALSE	High	INQSLLQPLNVEIDPEIQK	K			2	3	2	sp; IPI00000001.1	0	2191.2	0	123322	145393		Shared	Peak Found	High	Not Found	High	45	47.9
FALSE	High	INVYYN	N			6	10	1	E1BJB1; F2Z5K5; I3LBV1; Q2HJ81; F2Z571; F2Z5B2	0	785.383	0	269900	520035	1476868	Shared	Peak Found	Peak Found	High	High	19	26.65
FALSE	High	INVYYNEAAGNK	K			1	3	146	E1BJB1	0	1355.66	0	1.47435e+08	2.41773e+08	3.83412e+08		High	High	High	High	79	24.95
FALSE	High	INVYYNEAAGNKYVPR	R			1	3	7	E1BJB1	1	1870.94	0	285639	416333	1.0152e+06		High	High	High	High	94	31.53
FALSE	High	INVYYNEATGGK	K			1	1	66	F2Z571	0	1328.65	0	6.38586e+07	1.04753e+08	1.10767e+08		High	High	High	High	88	26.2
FALSE	High	INVYYNEATGGKYVPR	R			1	1	1	F2Z571	1	1843.93	0			172485		Not Found	Not Found	High	High	70	31.49
FALSE	High	INVYYNEATGGNYVPR	R			1	1	34	F2Z5K5	0	1829.88	0	3.53398e+07	5.66538e+07	7.26916e+07		High	High	High	High	107	34.6
FALSE	High	INVYYNEATGNK	K			1	3	23	F2Z5B2	0	1385.67	0	4.74696e+07	5.21755e+07	7.11389e+07		High	High	High	High	80	25.48
FALSE	High	INVYYNEATGNKYVPR	R			1	3	4	F2Z5B2	1	1900.96	0	319434	402204	514846		Peak Found	High	High	High	55	31.5
FALSE	High	INYQPPTVVPGGDLAK	K			5	13	2	F1RK98; Q2HJB8; F1SHC1; F1MNF8; F2Z5S8	0	1668.9	0		173860	403976	Shared	Not Found	High	High	High	33	35.88
FALSE	High	IQAGQCGNQIGAK	K		1xCarbamidomethyl [C6]	6	11	10	E1BJB1; F2Z5K5; F1S6M7; Q767L7; F2Z571; F2Z5B2	0	1344.67	0		350394	754935	Shared	High	High	High	High	64	16.35
FALSE	High	IQAQISALEEQLQQIR	R			1	2	1	IPI00000012.1	0	1868.02	0					Not Found	Not Found	Not Found	High	61	48.39
FALSE	High	IQDWYDK	K			1	2	13	IPI00000010.1	0	967.452	0	2.13887e+07	3.50059e+07	6.45534e+06		High	High	High	High	41	25.21
FALSE	High	IQDWYDKK	K			1	2	14	IPI00000010.1	1	1095.55	0	2.27796e+07	2.54411e+07	1.02099e+07		High	High	High	High	42	21.7
FALSE	High	IQEQISNLEAQITDVR	R			1	2	6	IPI00000010.1	0	1856.97	0		334329			High	High	Not Found	High	113	43.12
FALSE	High	IQPDGQMPSDK	K			6	15	2	F1RK98; P02550; A7E1S5; F1SHC1; F1MNF8; F2Z5S8	0	1215.57	0				Shared	Not Found	Not Found	Not Found	High	38	18.42
FALSE	High	IQQTIAAN	N			1	1	5	sp	0	858.468	0	3.39615e+06	3.77775e+06	5.74929e+06		High	Peak Found	High	High	28	16.79
FALSE	High	IRDWYQR	R			3	3	5	IPI00000011.1; sp; IPI00000013.1	1	1036.53	0	4.23786e+06	8840944	1.77635e+06	Shared	High	High	Peak Found	High	31	22.58
FALSE	High	IREEFPDR	R			3	4	31	A5GFX6; F2Z5K5; I3LBV1	1	1061.54	0	5.06562e+07	1.12325e+08	142604486	Shared	High	High	High	High	41	19.88
FALSE	High	IREEYPDR	R			6	11	75	E1BJB1; Q2HJ81; E1BJK2; Q767L7; F2Z571; F2Z5B2	1	1077.53	0	2.93591e+08	5.3963e+08	5.10729e+08	Shared	High	High	High	High	53	14.62
FALSE	High	IRLENEIQ	Q			1	2	1	IPI00000012.1	1	1014.56	0					Not Found	Not Found	Not Found	High	22	26.66
FALSE	High	IRLENEIQT	T			1	2	2	IPI00000012.1	1	1115.61	0	276964	209120			High	Peak Found	Not Found	High	30	29.02
FALSE	High	IRLENEIQTYR	R			1	2	21	IPI00000012.1	1	1434.77	0	46077106	29407844	15803989		High	High	High	High	83	30.14
FALSE	High	ISALEEQLQQIR	R			1	2	9	IPI00000012.1	0	1427.79	0	3.31296e+06	3028124	1.46148e+06		High	High	High	High	87	39.32
FALSE	High	ISEQFSAMFR	R			2	3	1	I3LBV1; Q2HJ81	0	1215.58	0		1.5008e+06		Shared	Not Found	Peak Found	Not Found	High	23	33.96
FALSE	High	ISEQFTAM	M		1xOxidation [M8]	6	8	10	E1BJB1; F2Z5K5; F1S6M7; Q767L7; F2Z571; F2Z5B2	0	942.424	0	5.31951e+06	2.92054e+06	8.51335e+06	Shared	High	High	High	High	29	24.53
FALSE	High	ISEQFTAMFR	R	1	1xOxidation [M8]	6	8	278	E1BJB1; F2Z5K5; F1S6M7; Q767L7; F2Z571; F2Z5B2	0	1245.59	0	3.71665e+08	4.05149e+08	4.36244e+08	Shared	High	High	High	High	70	33.84
FALSE	High	ISEQFTAMFR	R	1		6	8	41	E1BJB1; F2Z5K5; F1S6M7; Q767L7; F2Z571; F2Z5B2	0	1229.6	0	1.3437e+07	4.58467e+07	1.31005e+08	Shared	High	High	High	High	88	41.37
FALSE	High	ISETNVILSMDNNR	R		1xOxidation [M10]	2	3	5	sp; IPI00000001.1	0	1621.79	0	605947	407114		Shared	High	High	Not Found	High	66	29.5
FALSE	High	ISETNVILSMDNNR	R			2	3	3	sp; IPI00000001.1	0	1605.79	0	131225			Shared	High	Not Found	Not Found	High	99	37.09
FALSE	High	ISGWGNTK	K			1	2	4	sp	0	862.442	0	198334	150105			High	High	High	High	35	19.43
FALSE	High	ISIGGGSCAISGGYGSR	R		1xCarbamidomethyl [C8]	1	1	6	IPI00000005.1	0	1598.76	0	1357185	1717302	503665		High	High	High	High	116	30.5
FALSE	High	ISNLEAQITDVR	R			1	2	8	IPI00000010.1	0	1358.73	0	611087	621684			High	High	Not Found	High	115	35.16
FALSE	High	ISSSKGSLGGGF	F			1	2	1	IPI00000012.1	1	1096.56	0		550127			Not Found	High	Not Found	High	51	26.18
FALSE	High	ISSSKGSLGGGFSSGGF	F			1	2	1	IPI00000012.1	1	1531.74	0				No Quan Values	Not Found	High	Not Found	High	28
FALSE	High	ISSSKGSLGGGFSSGGFSGGSFSR	R			1	2	6	IPI00000012.1	1	2210.05	0	110134	245803	826109		High	High	High	High	61	34.44
FALSE	High	ISSVLAGGSCR	R		1xCarbamidomethyl [C10]	2	2	6	IPI00000011.1; IPI00000013.1	0	1106.56	0	874758	2.46718e+06	531470	Shared	High	High	High	High	64	21.89
FALSE	High	ISVAGGGGGFGAAGGFGGR	R			2	2	1	IPI00000008.1; sp	0	1551.77	0				Shared	Not Found	Not Found	Not Found	High	90	34.79
FALSE	High	ISVYYNEASSH	H			1	2	2	F1S6M7	0	1269.57	0	704593	371251	281099		High	Peak Found	Peak Found	High	34	25.08
FALSE	High	ISVYYNEASSHK	K			1	2	99	F1S6M7	0	1397.67	0	2.17126e+08	1.99319e+08	3.12269e+08		High	High	High	High	85	22.07
FALSE	High	ISVYYNEASSHKYVPR	R			1	2	2	F1S6M7	1	1912.96	0	437495		516150		Peak Found	Not Found	High	High	68	27.28
FALSE	High	ISVYYNEATGGK	K			1	1	20	Q767L7	0	1301.64	0	1.07654e+07	1.63841e+07	1.64424e+07		High	High	High	High	74	26.12
FALSE	High	ITASLR	R			9	20	6	F1RK98; G5E6J5; Q2HJB8; I3LDR2; P02550; F1SHC1; F1MNF8; F1RYV9; F2Z5S8	0	660.404	0	189499	395955	2.0872e+06	Shared	High	High	High	High	31	17.29
FALSE	High	ITEEIR	R			1	1	8	sp	0	760.42	0	5.77978e+06		1.28722e+06		High	Not Found	High	High	31	19.23
FALSE	High	ITGKEDAANNYAR	R			7	18	7	F1RK98; Q2HJB8; I3LDR2; P02550; A7E1S5; F1SHC1; F2Z5S8	1	1422.7	0	72872.7	482059	356816	Shared	Peak Found	High	High	High	89	14.32
FALSE	High	ITMQNLNDR	R			1	1	3	sp	0	1104.55	0	3.76007e+06		1.75022e+06		High	Not Found	High	High	63	24.14
FALSE	High	ITVDDK	K			1	1	6	sp	0	690.367	0	105353	874128			Peak Found	High	Not Found	High	49	12.35
FALSE	High	ITVDDKHYQK	K			1	1	2	sp	1	1246.64	0		1.06222e+06			Not Found	High	Not Found	High	61	14.38
FALSE	High	IVGGYTC	C		1xCarbamidomethyl [C7]	2	3	1	sp; sp	0	769.355	0	1.45677e+06	1.48356e+06	4.0903e+06	Shared	Peak Found	Peak Found	Peak Found	High	17	19.39
FALSE	High	IVLQIDNAR	R			1	1	1	IPI00000009.1	0	1041.61	0	126360				Peak Found	Not Found	Not Found	High	30	31.01
FALSE	High	IVSSITASLR	R			7	18	3	F1RK98; Q2HJB8; I3LDR2; P02550; F1SHC1; F1MNF8; F2Z5S8	0	1046.62	0	250555		1.92471e+06	Shared	Peak Found	High	High	High	59	30.95
FALSE	High	IYDICR	R		1xCarbamidomethyl [C5]	7	18	1	F1RK98; Q2HJB8; I3LDR2; P02550; F1SHC1; F1MNF8; F2Z5S8	0	839.408	0				No Quan Values	Not Found	Not Found	High	High	30
FALSE	High	KAALEK	K			1	2	6	IPI00000010.1	1	659.409	0	301720	529386	146271		Peak Found	High	Peak Found	High	46	6.91
FALSE	High	KAFLHWY	Y			6	8	2	E1BJB1; F2Z5K5; F1S6M7; Q767L7; F2Z571; F2Z5B2	1	964.504	0	1184050	2.08855e+06	5083629	Shared	Peak Found	Peak Found	High	High	24	36.91
FALSE	High	KAFLHWYTGEGMD	D		1xOxidation [M12]	6	8	1	E1BJB1; F2Z5K5; F1S6M7; Q767L7; F2Z571; F2Z5B2	1	1570.7	0	100460			Shared	Peak Found	Not Found	Not Found	High	22	35.73
FALSE	High	KAFLHWYTGEGMDEME	E		2xOxidation [M12; M15]	6	8	1	E1BJB1; F2Z5K5; F1S6M7; Q767L7; F2Z571; F2Z5B2	1	1975.82	0	349562	138801		Shared	High	Peak Found	Not Found	High	48	35.31
FALSE	High	KAQYEDIAQK	K			2	2	2	sp; IPI00000001.1	1	1193.62	0				No Quan Values	Not Found	Not Found	Not Found	High	40
FALSE	High	KAVPYPQR	R			1	1	1	sp	1	958.547	0				No Quan Values	Not Found	High	Not Found	High	41
FALSE	High	KDAEAWFNEK	K			1	2	11	IPI00000012.1	1	1237.58	0	9537426	8042402	2.19113e+06		High	High	High	High	68	27.93
FALSE	High	KDIENQYETQIT	T			1	2	1	IPI00000010.1	1	1481.71	0				No Quan Values	Not Found	Not Found	Not Found	High	38
FALSE	High	KDIENQYETQITQIEHEVSSSGQEVQSSAK	K			1	2	13	IPI00000010.1	1	3392.61	0	4.42962e+06	7.53492e+06	1.10663e+06		High	High	High	High	131	45.29
FALSE	High	KDVDGAYMTK	K		1xOxidation [M8]	2	3	7	sp; IPI00000001.1	1	1143.54	0	370572	586960		Shared	High	High	Not Found	High	48	11.1
FALSE	High	KDVDGAYMTK	K			2	3	12	sp; IPI00000001.1	1	1127.54	0	1.7301e+06	2.98205e+06	653823	Shared	High	High	High	High	56	15.32
FALSE	High	KDVDNAYMIK	K		1xOxidation [M8]	2	2	9	IPI00000008.1; sp	1	1212.59	0	1.54078e+06	1.07916e+06	271027	Shared	High	High	High	High	65	18.42
FALSE	High	KDVDNAYMIK	K			2	2	5	IPI00000008.1; sp	1	1196.6	0	71716.6	148634		Shared	Peak Found	High	Not Found	High	47	22.37
FALSE	High	KEAESCDCLQGF	F		2xCarbamidomethyl [C6; C8]	3	3	5	F2Z5K5; Q767L7; F2Z571	1	1443.59	0	383369	587933	2324765	Shared	High	High	High	High	56	29.85
FALSE	High	KEAESCDCLQGFQLTH	H		2xCarbamidomethyl [C6; C8]	3	3	6	F2Z5K5; Q767L7; F2Z571	1	1922.84	0	2.0885e+06	3.0111e+06	6.53951e+06	Shared	Peak Found	High	High	High	82	32.68
FALSE	High	KEAESCDCLQGFQLTHSLGGGTGSGMGTLLISK	K		2xCarbamidomethyl [C6; C8]; 1xOxidation [M26]	3	3	15	F2Z5K5; Q767L7; F2Z571	1	3455.62	0	1.43445e+07	24243613	2.16514e+07	Shared	High	High	High	High	90	41.66
FALSE	High	KEAESCDCLQGFQLTHSLGGGTGSGMGTLLISK	K		2xCarbamidomethyl [C6; C8]	3	3	5	F2Z5K5; Q767L7; F2Z571	1	3439.63	0	344802	1.6494e+06	3.89268e+06	Shared	Peak Found	High	High	High	85	45.39
FALSE	High	KECENCDCLQGF	F		3xCarbamidomethyl [C3; C6; C8]	1	2	5	F1S6M7	1	1559.59	0	1064899	742191	5.1201e+06		High	High	High	High	57	29.49
FALSE	High	KECENCDCLQGFQLTH	H		3xCarbamidomethyl [C3; C6; C8]	1	2	9	F1S6M7	1	2038.84	0	6.28807e+06	5.0702e+06	1.71712e+07		High	High	High	High	64	32.29
FALSE	High	KECENCDCLQGFQLTHSLGGGTGSGMGTLLISK	K		3xCarbamidomethyl [C3; C6; C8]; 1xOxidation [M26]	1	2	27	F1S6M7	1	3571.63	0	4.98479e+07	5.55698e+07	6.2439e+07		High	High	High	High	92	41.42
FALSE	High	KECENCDCLQGFQLTHSLGGGTGSGMGTLLISK	K		3xCarbamidomethyl [C3; C6; C8]	1	2	7	F1S6M7	1	3555.63	0	642166	1.84479e+06	1.85657e+07		Peak Found	High	High	High	85	45.22
FALSE	High	KESEHCDCLQGFQLTHSLGGGTGSGMGTLLISK	K		2xCarbamidomethyl [C6; C8]; 1xOxidation [M26]	1	2	1	I3LBV1	1	3521.65	0				No Quan Values	Not Found	High	Not Found	High	19
FALSE	High	KESESCDCLQGF	F		2xCarbamidomethyl [C6; C8]	2	6	2	E1BJB1; F2Z5B2	1	1459.58	0	968837	1.05211e+06	6596650	Shared	Peak Found	Peak Found	Peak Found	High	42	29.55
FALSE	High	KESESCDCLQGFQLTH	H		2xCarbamidomethyl [C6; C8]	2	6	13	E1BJB1; F2Z5B2	1	1938.83	0	6.61354e+06	7.92982e+06	1.99602e+07	Shared	High	High	High	High	100	32.5
FALSE	High	KESESCDCLQGFQLTHSLGGGTGSGMGTLLISK	K		2xCarbamidomethyl [C6; C8]; 1xOxidation [M26]	2	6	36	E1BJB1; F2Z5B2	1	3471.62	0	4.44292e+07	73700135	5.9739e+07	Shared	High	High	High	High	96	41.56
FALSE	High	KESESCDCLQGFQLTHSLGGGTGSGMGTLLISK	K		2xCarbamidomethyl [C6; C8]	2	6	4	E1BJB1; F2Z5B2	1	3455.62	0		1443983	4239842	Shared	Not Found	Peak Found	Peak Found	High	79	45.35
FALSE	High	KGHYTEGAELMDSVLDVVR	R			1	2	1	I3LBV1	1	2119.05	0					Not Found	Not Found	Not Found	High	58	49.53
FALSE	High	KGHYTEGAELVDAVLDVVR	R			1	1	9	F2Z5K5	1	2071.08	0	382946	1.11311e+06	361029		High	High	Peak Found	High	58	54.22
FALSE	High	KGHYTEGAELVDSVLDVVR	R			6	12	32	E1BJB1; F1S6M7; Q2HJ81; Q767L7; F2Z571; F2Z5B2	1	2087.08	2	4.9242e+06	9.63389e+06	7.07817e+06	Shared	High	High	High	High	136	49.62
FALSE	High	KGPAAIQK	K			1	2	9	IPI00000010.1	1	812.499	0	2.52562e+06	1.02651e+07	2.29843e+06		High	High	High	High	61	9.2
FALSE	High	KIEISELNR	R			4	5	3	sp; IPI00000008.1; IPI00000001.1; sp	1	1101.63	0				Shared	Not Found	High	Not Found	High	53	25.33
FALSE	High	KIQDWYDK	K			1	2	1	IPI00000010.1	1	1095.55	0		107299			Not Found	Peak Found	Not Found	High	39	24.52
FALSE	High	KLAADDFR	R			2	8	1	sp; sp	1	935.495	0				No Quan Values	Not Found	Not Found	Not Found	High	38
FALSE	High	KLADQCTGLQGFLVF	F		1xCarbamidomethyl [C6]	3	10	7	A7E1S5; F1SHC1; F1MNF8	1	1696.87	0	951867	2109597	12072884	Shared	High	High	High	High	68	53.96
FALSE	High	KLADQCTGLQGFLVFH	H		1xCarbamidomethyl [C6]	3	10	13	A7E1S5; F1SHC1; F1MNF8	1	1833.93	0	846320	2.25346e+06	1.30452e+07	Shared	High	High	High	High	74	46.89
FALSE	High	KLADQCTGLQGFLVFHSF	F		1xCarbamidomethyl [C6]	3	10	5	A7E1S5; F1SHC1; F1MNF8	1	2068.03	0		207253	1.34144e+06	Shared	Not Found	High	High	High	33	52.83
FALSE	High	KLADQCTGLQGFLVFHSFGGGTGSGF	F		1xCarbamidomethyl [C6]	3	10	2	A7E1S5; F1SHC1; F1MNF8	1	2688.29	0	121319	316826	581555	Shared	Peak Found	Peak Found	High	High	45	54.09
FALSE	High	KLADQCTGLQGFLVFHSFGGGTGSGFTSL	L		1xCarbamidomethyl [C6]	3	10	1	A7E1S5; F1SHC1; F1MNF8	1	2989.45	0		171962	547632	Shared	Not Found	Peak Found	High	High	20	56.23
FALSE	High	KLADQCTGLQGFLVFHSFGGGTGSGFTSLLMER	R		1xCarbamidomethyl [C6]; 1xOxidation [M31]	3	10	6	A7E1S5; F1SHC1; F1MNF8	1	3534.71	0		871102	1.30406e+06	Shared	High	High	High	High	75	56.01
FALSE	High	KLATPTYGDLNHLVSATMSGVTTSLR	R		1xOxidation [M18]	1	2	4	F1S6M7	1	2749.42	0	566550	580461			High	High	Not Found	High	37	45.5
FALSE	High	KLATPTYGDLNHLVSATMSGVTTSLR	R			1	2	6	F1S6M7	1	2733.42	0	220434	331686	329523		High	High	High	High	105	53.54
FALSE	High	KLAVNMVPFPR	R		1xOxidation [M6]	10	16	185	A5GFX6; E1BJB1; F2Z5K5; F1S6M7; I3LBV1; Q2HJ81; E1BJK2; Q767L7; F2Z571; F2Z5B2	1	1287.72	0	1.05128e+08	1.53063e+08	1.14861e+08	Shared	High	High	High	High	79	32.11
FALSE	High	KLAVNMVPFPR	R			10	16	26	A5GFX6; E1BJB1; F2Z5K5; F1S6M7; I3LBV1; Q2HJ81; E1BJK2; Q767L7; F2Z571; F2Z5B2	1	1271.73	1	12196175	51200128	1.37727e+08	Shared	High	High	High	High	75	37.58
FALSE	High	KLLEGEECR	R		1xCarbamidomethyl [C8]	4	4	6	IPI00000008.1; IPI00000005.1; sp; IPI00000007.1	1	1133.56	0	1.28926e+06	1.05643e+06	315878	Shared	High	High	High	High	50	16.26
FALSE	High	KLLEGEEYR	R			1	1	2	IPI00000004.1	1	1136.59	0	687680				High	Not Found	High	High	46	20.86
FALSE	High	KLNDLEDALQQAK	K			2	3	1	sp; IPI00000001.1	1	1485.79	0				Shared	Not Found	Not Found	Not Found	High	62	34.52
FALSE	High	KLSDQCTGLQGFLVF	F		1xCarbamidomethyl [C6]	1	1	5	F2Z5S8	1	1712.87	0	208523	328055	2022426		High	High	High	High	66	53.82
FALSE	High	KLSDQCTGLQGFLVFH	H		1xCarbamidomethyl [C6]	1	1	8	F2Z5S8	1	1849.93	0		652143	2.96523e+06		Not Found	High	High	High	84	46.27
FALSE	High	KLSDQCTGLQGFLVFHSF	F		1xCarbamidomethyl [C6]	1	1	1	F2Z5S8	1	2084.03	0				No Quan Values	Not Found	Not Found	High	High	37
FALSE	High	KLSDQCTGLQGFLVFHSFGGGTGSGFTSLLMER	R		1xCarbamidomethyl [C6]; 1xOxidation [M31]	1	1	5	F2Z5S8	1	3550.71	0					Not Found	High	Not Found	High	50	55.49
FALSE	High	KLTTPTYGDLNHLVSATMSGVTTCLR	R		1xCarbamidomethyl [C24]; 1xOxidation [M18]	5	9	3	E1BJB1; F2Z5K5; Q767L7; F2Z571; F2Z5B2	1	2852.43	0	229172			Shared	High	High	Not Found	High	41	45.25
FALSE	High	KLTTPTYGDLNHLVSATMSGVTTCLR	R		1xCarbamidomethyl [C24]	5	9	1	E1BJB1; F2Z5K5; Q767L7; F2Z571; F2Z5B2	1	2836.43	0		195614	73113.7	Shared	Not Found	Peak Found	Peak Found	High	41	52.87
FALSE	High	KMSATFIGNSTAIQELFK	K		1xOxidation [M2]	4	6	2	E1BJB1; Q2HJ81; F2Z571; F2Z5B2	1	2002.03	1	247265	558542	1349589	Shared	Peak Found	High	High	High	29	47.07
FALSE	High	KMSSTFIGNSTAIQELFK	K		1xOxidation [M2]	1	2	1	F1S6M7	1	2018.03	0	220132				High	Not Found	Not Found	High	52	46.66
FALSE	High	KMSSTFIGNSTAIQELFK	K			1	2	2	F1S6M7	1	2002.03	0				No Quan Values	Peak Found	Peak Found	High	High	29	47.07
FALSE	High	KNHEEEMKDLR	R		1xOxidation [M7]	1	2	1	IPI00000012.1	2	1444.68	0				No Quan Values	Not Found	High	Not Found	High	30
FALSE	High	KNHEEEMKDLR	R			1	2	14	IPI00000012.1	2	1428.69	0	1.26442e+06	1.54368e+06	597344		High	High	High	High	75	14.32
FALSE	High	KNHEEEMLALR	R			1	1	3	IPI00000013.1	1	1369.69	0					Not Found	Not Found	Not Found	High	71	24.85
FALSE	High	KNHEEEMNALR	R			1	1	4	IPI00000011.1	1	1370.65	0	102765	320053			Peak Found	High	Not Found	High	50	16.42
FALSE	High	KNMMAACDPR	R		1xCarbamidomethyl [C7]	8	11	1	E1BJB1; F2Z5K5; F1S6M7; I3LBV1; Q2HJ81; Q767L7; F2Z571; F2Z5B2	1	1193.52	0	46695.8		192231	Shared	Peak Found	Not Found	High	High	27	16.52
FALSE	High	KQISNLQQSISDAEQR	R			2	3	13	sp; IPI00000001.1	1	1844.95	0	2.15282e+06	2.5346e+06	927718	Shared	High	High	High	High	149	29.14
FALSE	High	KQLDTLGNDK	K			1	1	2	IPI00000004.1	1	1131.6	0	1.18356e+06				High	Not Found	Not Found	High	57	15.05
FALSE	High	KQTALVELVK	K			1	1	1	sp	1	1128.7	0		78702			Not Found	Peak Found	Not Found	High	37	29.48
FALSE	High	KSDLEMQYETLQEELMALK	K		2xOxidation [M6; M16]	1	2	1	IPI00000010.1	1	2331.11	0	121825				Peak Found	Not Found	Not Found	High	60	51.17
FALSE	High	KSEITELR	R			1	2	4	IPI00000012.1	1	975.547	0	314014	549435			High	High	Not Found	High	54	18.44
FALSE	High	KSEITELRR	R			1	2	1	IPI00000012.1	2	1131.65	0					Not Found	Not Found	Not Found	High	18	16.2
FALSE	High	KTIGGGDDSFNTFFSETGAGK	K			5	14	1	F1RK98; P02550; A7E1S5; F1SHC1; F1MNF8	1	2135.99	0	607609	120023		Shared	Peak Found	Peak Found	Not Found	High	54	40.53
FALSE	High	KVDPEIQNVK	K			2	2	2	IPI00000008.1; sp	1	1169.65	0			176188	Shared	High	Not Found	Peak Found	High	51	18.29
FALSE	High	KVGINYEPPTVVPGGDLAK	K			1	1	1	P02550	1	1954.06	0				Not Reliable	High	Not Found	Not Found	High	35
FALSE	High	KVGINYQPPTVVPGGDLAK	K			5	13	10	F1RK98; Q2HJB8; F1SHC1; F1MNF8; F2Z5S8	1	1953.08	0	744059	2.7041e+06	2.75277e+06	Shared	High	High	High	High	66	35.5
FALSE	High	KVLGAFSDGLAHLDNLK	K			1	1	1	sp	1	1797.99	0		876111			Not Found	High	Not Found	High	73	41.88
FALSE	High	KVPQVSTPTLVEVSR	R			2	2	5	sp; sp	1	1639.94	0	491757	744708		Shared	High	Peak Found	Not Found	High	71	32.98
FALSE	High	KYEDEINK	K			8	9	6	IPI00000006.1; sp; IPI00000008.1; IPI00000001.1; IPI00000005.1; sp; IPI00000007.1; IPI00000002.1	1	1038.51	0	808207	1.4469e+06		Shared	Peak Found	Peak Found	Not Found	High	45	13.68
FALSE	High	KYEDEINKR	R			8	9	16	IPI00000006.1; sp; IPI00000008.1; IPI00000001.1; IPI00000005.1; sp; IPI00000007.1; IPI00000002.1	2	1194.61	0	20226462	1.06069e+07	4.77995e+06	Shared	High	High	High	High	58	13.53
FALSE	High	KYENEVALR	R			1	2	1	IPI00000012.1	1	1121.59	0					Not Found	Not Found	Not Found	High	36	19.58
FALSE	High	LAADDF	F			7	14	2	sp; IPI00000012.1; IPI00000011.1; sp; IPI00000009.1; sp; IPI00000013.1	0	651.298	0	138176	98452.7		Shared	Peak Found	Peak Found	Not Found	High	28	29.27
FALSE	High	LAADDFR	R			7	14	19	sp; IPI00000012.1; IPI00000011.1; sp; IPI00000009.1; sp; IPI00000013.1	0	807.4	0	1.21963e+08	1.17203e+08	5.87474e+07	Shared	High	High	High	High	55	22.82
FALSE	High	LAADDFRIK	K			2	5	2	IPI00000012.1; sp	1	1048.58	0				Not Reliable	High	Not Found	Not Found	High	33
FALSE	High	LADLECALQQAK	K		1xCarbamidomethyl [C6]	1	1	1	sp	0	1359.69	0				Not Reliable	Not Found	Not Found	Not Found	High	17
FALSE	High	LADQCTGL	L		1xCarbamidomethyl [C5]	4	13	1	P02550; A7E1S5; F1SHC1; F1MNF8	0	877.408	0		237288	1.32344e+06	Shared	Not Found	Peak Found	High	High	24	24.45
FALSE	High	LADQCTGLQGF	F		1xCarbamidomethyl [C5]	4	13	3	P02550; A7E1S5; F1SHC1; F1MNF8	0	1209.56	0	1.93219e+06	5.53578e+06	35810255	Shared	Peak Found	Peak Found	High	High	35	36.81
FALSE	High	LADQCTGLQGFL	L		1xCarbamidomethyl [C5]	3	12	1	A7E1S5; F1SHC1; F1MNF8	0	1322.64	0				No Quan Values	Not Found	Not Found	High	High	24
FALSE	High	LADQCTGLQGFLV	V		1xCarbamidomethyl [C5]	3	10	2	A7E1S5; F1SHC1; F1MNF8	0	1421.71	0	361980	370652	905059	Shared	Peak Found	Peak Found	High	High	22	49.73
FALSE	High	LADQCTGLQGFLVF	F		1xCarbamidomethyl [C5]	3	10	11	A7E1S5; F1SHC1; F1MNF8	0	1568.78	0	2370383	4.47937e+06	41184270	Shared	High	High	High	High	55	58.26
FALSE	High	LADQCTGLQGFLVFH	H		1xCarbamidomethyl [C5]	3	10	10	A7E1S5; F1SHC1; F1MNF8	0	1705.84	0	4.50823e+06	1.0034e+07	48507383	Shared	High	High	High	High	80	50.54
FALSE	High	LADQCTGLQGFLVFHSF	F		1xCarbamidomethyl [C5]	3	10	7	A7E1S5; F1SHC1; F1MNF8	0	1939.94	0	371115	1063405	7305004	Shared	High	Peak Found	High	High	66	56.62
FALSE	High	LADQCTGLQGFLVFHSFGGGTGSGF	F		1xCarbamidomethyl [C5]	3	10	4	A7E1S5; F1SHC1; F1MNF8	0	2560.19	0	228180	675419	2.84798e+06	Shared	Peak Found	High	High	High	53	56.85
FALSE	High	LADQCTGLQGFLVFHSFGGGTGSGFTSL	L		1xCarbamidomethyl [C5]	3	10	3	A7E1S5; F1SHC1; F1MNF8	0	2861.36	0				No Quan Values	Not Found	Not Found	High	High	42
FALSE	High	LADQCTGLQGFLVFHSFGGGTGSGFTSLLMER	R		1xCarbamidomethyl [C5]; 1xOxidation [M30]	3	10	13	A7E1S5; F1SHC1; F1MNF8	0	3406.62	0	2.18164e+06	1.04837e+07	1.74259e+07	Shared	High	High	High	High	133	58.07
FALSE	High	LADQCTGLQGFLVFHSFGGGTGSGFTSLLMER	R		1xCarbamidomethyl [C5]	3	10	1	A7E1S5; F1SHC1; F1MNF8	0	3390.62	0				No Quan Values	Not Found	Not Found	Not Found	High	80
FALSE	High	LAIQSK	K			1	2	1	F1S6M7	0	659.409	0					Not Found	Not Found	Not Found	High	30	13.63
FALSE	High	LAKTYET	T			1	1	1	sp	1	825.435	0	172652	230435			Peak Found	Peak Found	Not Found	High	18	16.19
FALSE	High	LALDIE	E			4	6	2	sp; IPI00000001.1; IPI00000004.1; IPI00000002.1	0	673.377	0				Shared	Not Found	Not Found	Not Found	High	20	37.92
FALSE	High	LALDIEIA	A			4	6	2	sp; IPI00000001.1; IPI00000004.1; IPI00000002.1	0	857.498	0	504319	314255		Shared	Peak Found	Peak Found	Not Found	High	18	47.75
FALSE	High	LALDIEIATYR	R			4	6	42	sp; IPI00000001.1; IPI00000004.1; IPI00000002.1	0	1277.71	0	8166866	5.96919e+06	3.11126e+06	Shared	High	High	High	High	80	44.77
FALSE	High	LALDVEIA	A			5	5	2	IPI00000006.1; IPI00000008.1; IPI00000005.1; sp; IPI00000007.1	0	843.482	0				Shared	Not Found	Not Found	Not Found	High	31	43.33
FALSE	High	LALDVEIATYR	R			5	5	13	IPI00000006.1; IPI00000008.1; IPI00000005.1; sp; IPI00000007.1	0	1263.69	0	3.85904e+06	2.85595e+06	2.06494e+06	Shared	High	High	High	High	95	41.75
FALSE	High	LALDVEIATYRK	K			5	5	4	IPI00000006.1; IPI00000008.1; IPI00000005.1; sp; IPI00000007.1	1	1391.79	0	294171			Shared	High	Not Found	Not Found	High	44	36.94
FALSE	High	LASDDFR	R			1	3	6	sp	0	823.394	0	2.73616e+06	3.95411e+06	893266		Peak Found	High	High	High	41	22.82
FALSE	High	LASYLDK	K			5	7	22	IPI00000012.1; IPI00000011.1; IPI00000014.1; IPI00000010.1; IPI00000013.1	0	809.44	0	127729900	131464728	59182702	Shared	High	High	High	High	54	21.47
FALSE	High	LASYLDKVQALEEANNDLENK	K			1	2	9	IPI00000010.1	1	2377.19	0	2.08545e+06	3.10189e+06			High	High	Not Found	High	112	41.75
FALSE	High	LASYLDKVR	R			4	5	9	IPI00000012.1; IPI00000011.1; IPI00000014.1; IPI00000013.1	1	1064.61	0	3.40288e+06	848451		Shared	High	High	Not Found	High	59	25.48
FALSE	High	LASYLEK	K			3	8	5	sp; sp; IPI00000015.1	0	823.456	0	7.15278e+06	274692	2703541	Shared	High	High	High	High	43	21.97
FALSE	High	LATPTYGDLNHLVSATM	M		1xOxidation [M17]	1	2	2	F1S6M7	0	1819.89	0	1.40337e+06	837674	1.69509e+06		Peak Found	Peak Found	High	High	28	42.15
FALSE	High	LATPTYGDLNHLVSATMSGVTTSLR	R		1xOxidation [M17]	1	2	177	F1S6M7	0	2621.32	0	1.88913e+08	1.46325e+08	2.03049e+08		High	High	High	High	193	47.83
FALSE	High	LATPTYGDLNHLVSATMSGVTTSLR	R			1	2	45	F1S6M7	0	2605.33	0	3.94253e+07	5.01742e+07	1.3249e+08		High	High	High	High	130	56.03
FALSE	High	LATPTYGDLNHLVSATMSGVTTSLRFPGQLNADLRK	K		1xOxidation [M17]	1	2	1	F1S6M7	2	3861	0					Not Found	Not Found	Not Found	High	18	53.03
FALSE	High	LAVNMVPFPR	R		1xOxidation [M5]	10	16	217	A5GFX6; E1BJB1; F2Z5K5; F1S6M7; I3LBV1; Q2HJ81; E1BJK2; Q767L7; F2Z571; F2Z5B2	0	1159.63	0	7.19062e+08	8.43713e+08	3.996e+08	Shared	High	High	High	High	78	36.45
FALSE	High	LAVNMVPFPR	R			10	16	37	A5GFX6; E1BJB1; F2Z5K5; F1S6M7; I3LBV1; Q2HJ81; E1BJK2; Q767L7; F2Z571; F2Z5B2	0	1143.63	0	3.85775e+07	1.14567e+08	3.28773e+08	Shared	High	High	High	High	71	41.65
FALSE	High	LDELRDEGK	K			1	1	1	sp	1	1074.54	0	115869	208331	81611.9		Peak Found	Peak Found	Peak Found	High	33	15.16
FALSE	High	LDHKFDLM	M		1xOxidation [M8]	7	15	21	F1RK98; Q2HJB8; I3LDR2; P02550; F1SHC1; F1MNF8; F2Z5S8	1	1034.5	0	7.41047e+06	1.38315e+07	1.21326e+07	Shared	High	High	High	High	41	24.99
FALSE	High	LDHKFDLM	M			7	15	11	F1RK98; Q2HJB8; I3LDR2; P02550; F1SHC1; F1MNF8; F2Z5S8	1	1018.5	0	1.36626e+06	1.89843e+07	5.27334e+07	Shared	High	High	High	High	41	32.54
FALSE	High	LDHKFDLMY	Y		1xOxidation [M8]	7	15	1	F1RK98; Q2HJB8; I3LDR2; P02550; F1SHC1; F1MNF8; F2Z5S8	1	1197.56	0				No Quan Values	Peak Found	High	Not Found	High	24	32.4
FALSE	High	LDHKFDLMYAK	K		1xOxidation [M8]	7	15	161	F1RK98; Q2HJB8; I3LDR2; P02550; F1SHC1; F1MNF8; F2Z5S8	1	1396.69	0	5.0644e+07	2.45408e+08	4.97529e+07	Shared	High	High	High	High	56	27.08
FALSE	High	LDHKFDLMYAK	K			7	15	33	F1RK98; Q2HJB8; I3LDR2; P02550; F1SHC1; F1MNF8; F2Z5S8	1	1380.7	0	1.0147e+07	183331056	149864768	Shared	High	High	High	High	59	30.95
FALSE	High	LDHKFDLMYAKR	R		1xOxidation [M8]	7	15	1	F1RK98; Q2HJB8; I3LDR2; P02550; F1SHC1; F1MNF8; F2Z5S8	2	1552.79	0	204588	514825	179597	Shared	Peak Found	High	Peak Found	High	38	24.31
FALSE	High	LDIDNTR	R			1	2	1	IPI00000010.1	0	846.432	0					Not Found	Not Found	Not Found	High	55	18.02
FALSE	High	LDIEIATYR	R			6	14	2	sp; sp; IPI00000001.1; sp; IPI00000004.1; IPI00000002.1	0	1093.59	0				No Quan Values	Not Found	Not Found	Not Found	High	58
FALSE	High	LDIERPTYTNLNR	R			6	17	12	F1RK98; Q2HJB8; I3LDR2; P02550; F1SHC1; F2Z5S8	0	1604.84	0	1.9462e+06	7.22955e+06	1.48896e+07	Shared	High	High	High	High	51	30.55
FALSE	High	LDLDSIIAEVK	K			5	6	2	sp; IPI00000008.1; IPI00000001.1; IPI00000005.1; sp	0	1215.68	0	480069			Shared	High	Not Found	Not Found	High	73	50.8
FALSE	High	LDLVLER	R			1	1	1	G5E6J5	0	857.509	0	335555	504886			Peak Found	High	Not Found	High	17	35.52
FALSE	High	LDNLQQEIDF	F			2	3	1	sp; IPI00000001.1	0	1234.6	0				Shared	Not Found	Not Found	Not Found	High	19	43.9
FALSE	High	LDNLQQEIDFL	L			2	3	1	sp; IPI00000001.1	0	1347.68	0	130964			Shared	Peak Found	Not Found	Not Found	High	27	52.51
FALSE	High	LDNLQQEIDFLT	T			2	3	1	sp; IPI00000001.1	0	1448.73	0				Shared	Not Found	Not Found	Not Found	High	34	52.63
FALSE	High	LDNLQQEIDFLTA	A			2	3	4	sp; IPI00000001.1	0	1519.76	0	288279	219550		Shared	High	High	Not Found	High	45	54.93
FALSE	High	LDNLQQEIDFLTAL	L			2	3	5	sp; IPI00000001.1	0	1632.85	0	2.96013e+06	1.30892e+06	264204	Shared	High	Peak Found	High	High	66	59
FALSE	High	LDNLQQEIDFLTALY	Y			2	3	1	sp; IPI00000001.1	0	1795.91	0				No Quan Values	Not Found	Not Found	Not Found	High	54
FALSE	High	LDNLQQEIDFLTALYQAELSQM	M		1xOxidation [M22]	2	3	1	sp; IPI00000001.1	0	2599.26	0				No Quan Values	Not Found	Not Found	Not Found	High	33
FALSE	High	LDNLQQEIDFLTALYQAELSQMQTQISETNVILSMDNNR	R		2xOxidation [M22; M35]	2	3	2	sp; IPI00000001.1	0	4559.19	0				No Quan Values	Not Found	Not Found	Not Found	High	61
FALSE	High	LDSELK	K			3	4	33	IPI00000006.1; sp; IPI00000001.1	0	704.383	0	4.44652e+07	8.94006e+07	18786456	Shared	High	High	High	High	40	14.57
FALSE	High	LDSELKNMQDMVEDYR	R		2xOxidation [M8; M11]	2	3	4	sp; IPI00000001.1	1	2017.88	0	827599	909950		Shared	High	High	Not Found	High	73	26.58
FALSE	High	LDSELR	R			1	1	13	IPI00000005.1	0	732.389	1	4.38203e+06	10439240	2.34477e+06		High	High	High	High	36	15.86
FALSE	High	LEAQITDVR	R			1	2	1	IPI00000010.1	0	1044.57	0					Not Found	Not Found	Not Found	High	58	25.28
FALSE	High	LEESNYELEGK	K			1	2	1	IPI00000012.1	0	1310.61	0				No Quan Values	Not Found	Not Found	Not Found	High	31
FALSE	High	LEFSIYPAPQ	Q			5	13	9	P02550; A7E1S5; F1SHC1; F1MNF8; F2Z5S8	0	1164.59	0	2.71571e+06	6629289	13848539	Shared	High	High	High	High	38	44.43
FALSE	High	LEFSIYPAPQVSTAVVEPYNSILTTH	H			5	13	32	P02550; A7E1S5; F1SHC1; F1MNF8; F2Z5S8	0	2876.47	0	4.08415e+06	7.35556e+06	34144780	Shared	High	High	High	High	87	54.52
FALSE	High	LEFSIYPAPQVSTAVVEPYNSILTTHTTLEH	H			5	13	2	P02550; A7E1S5; F1SHC1; F1MNF8; F2Z5S8	0	3457.75	0		103972	711897	Shared	Not Found	Peak Found	Peak Found	High	23	53.38
FALSE	High	LEFSIYPAPQVSTAVVEPYNSILTTHTTLEHS	S			5	13	4	P02550; A7E1S5; F1SHC1; F1MNF8; F2Z5S8	0	3544.78	0				Shared	Not Found	Not Found	Not Found	High	41	53.33
FALSE	High	LEFSIYPAPQVSTAVVEPYNSILTTHTTLEHSD	D			5	13	2	P02550; A7E1S5; F1SHC1; F1MNF8; F2Z5S8	0	3659.81	0				No Quan Values	Not Found	Not Found	High	High	52
FALSE	High	LEFSIYPAPQVSTAVVEPYNSILTTHTTLEHSDCAF	F		1xCarbamidomethyl [C34]	4	12	3	P02550; F1SHC1; F1MNF8; F2Z5S8	0	4037.95	0	456707	829267	5.30731e+06	Shared	Peak Found	High	High	High	36	55.5
FALSE	High	LEFSIYPAPQVSTAVVEPYNXILTTHTT	T			1	1	1	A7E1S5	0	3092.58	0				Not Reliable	Not Found	Not Found	Not Found	High	25
FALSE	High	LEGLEDALQK	K			1	1	3	IPI00000005.1	0	1115.59	0	534003	1.54016e+06			High	High	Not Found	High	42	32.82
FALSE	High	LEGLTDEI	I			1	1	3	IPI00000002.1	0	889.451	0				No Quan Values	High	High	Not Found	High	22
FALSE	High	LEKEIETYHNLLEGGQEDFESSGAGK	K			1	2	3	IPI00000010.1	1	2880.35	0	145408				Peak Found	Not Found	Not Found	High	88	39.03
FALSE	High	LENEIQ	Q			1	2	1	IPI00000012.1	0	745.373	0	54976.4				Peak Found	Not Found	Not Found	High	18	17.26
FALSE	High	LENEIQT	T			1	2	1	IPI00000012.1	0	846.42	0	204293	135517			Peak Found	Peak Found	Not Found	High	25	21.32
FALSE	High	LENEIQTY	Y			1	2	1	IPI00000012.1	0	1009.48	0					Not Found	Not Found	Not Found	High	19	27.89
FALSE	High	LENEIQTYR	R			1	2	18	IPI00000012.1	0	1165.58	0	5.68264e+07	5.38711e+07	2.33952e+07		High	High	High	High	71	23.63
FALSE	High	LEPGTMDSVR	R		1xOxidation [M6]	8	13	11	E1BJB1; F2Z5K5; F1S6M7; I3LBV1; Q2HJ81; Q767L7; F2Z571; F2Z5B2	0	1120.53	0			91997.5	Shared	Not Found	Not Found	Peak Found	High	39	15.83
FALSE	High	LEPGTMDSVR	R			8	13	9	E1BJB1; F2Z5K5; F1S6M7; I3LBV1; Q2HJ81; Q767L7; F2Z571; F2Z5B2	0	1104.54	0	672207	637690	874144	Shared	High	High	High	High	43	23.12
FALSE	High	LEPTVIDEIR	R			1	1	1	F2Z5S8	0	1184.65	0					Not Found	Not Found	Not Found	High	46	36.5
FALSE	High	LEPTVIDEVR	R			4	12	8	P02550; A7E1S5; F1SHC1; F1MNF8	0	1170.64	0	4255713	1976284	830863	Shared	High	High	High	High	63	32.48
FALSE	High	LEQEIATYR	R			3	3	10	IPI00000011.1; IPI00000013.1; IPI00000015.1	0	1122.58	0	7.79449e+06	9.43874e+06	2.41238e+06	Shared	High	High	High	High	59	24.14
FALSE	High	LEQQNQVLQTK	K			4	5	1	sp; IPI00000008.1; IPI00000001.1; sp	0	1328.72	0				Shared	Not Found	Not Found	Not Found	High	77	19.78
FALSE	High	LESRIR	R			1	1	1	sp	1	773.463	0				No Quan Values	Not Found	Not Found	Not Found	High	19
FALSE	High	LEVLVSDQAR	R			1	1	1	sp	0	1129.62	0	1.53664e+06				High	Not Found	Not Found	High	25	36.1
FALSE	High	LFRPDNFIFGQSGAGNNWAK	K			1	2	8	F1S6M7	0	2239.1	0	8.51549e+06	7.38739e+06	2.26677e+07		High	High	High	High	99	45.83
FALSE	High	LGALFRP	P			1	1	10	A5GFX6	0	773.467	0	1.69881e+06	1.95536e+06	496831		High	High	Peak Found	High	30	35.35
FALSE	High	LGEHNID	D			1	1	2	sp	0	797.379	0	476506	537489	604247		Peak Found	Peak Found	High	High	15	15.05
FALSE	High	LGEHNIDVL	L			1	1	5	sp	0	1009.53	0	3.4618e+06	2.03086e+06	2.64576e+06		High	Peak Found	High	High	37	33.88
FALSE	High	LGEHNIDVLE	E			1	1	1	sp	0	1138.57	0	385844	230660			High	Peak Found	Not Found	High	31	32.73
FALSE	High	LGEHNIDVLEGN	N			1	1	3	sp	0	1309.64	0	1.44749e+06	497064	1.26057e+06		High	Peak Found	High	High	45	32.22
FALSE	High	LGEHNIDVLEGNEQ	Q			1	1	5	sp	0	1566.74	0	3.04468e+06	1.14079e+06	1002584		High	High	Peak Found	High	50	32.07
FALSE	High	LGEHNIDVLEGNEQF	F			1	1	7	sp	0	1713.81	0	2480344	1555953	1.54108e+06		High	High	High	High	81	40.11
FALSE	High	LGEHNIDVLEGNEQFIN	N			1	1	20	sp	0	1940.93	0	4.36699e+07	2.98388e+07	40773860		High	High	High	High	112	41.44
FALSE	High	LGEHNIDVLEGNEQFINA	A			1	1	8	sp	0	2011.97	0	5.14085e+06	2644379	3.4383e+06		High	Peak Found	High	High	102	42.69
FALSE	High	LGEHNIDVLEGNEQFINAA	A			1	1	14	sp	0	2083.01	0	1.05492e+07	5599652	10620953		High	High	High	High	97	42.92
FALSE	High	LGEHNIDVLEGNEQFINAAK	K			1	1	46	sp	0	2211.1	0	2.7824e+08	2.81323e+08	2.74273e+08		High	High	High	High	96	39.62
FALSE	High	LGEHNIDVLEGNEQFINAAKIITHP	P			1	1	1	sp	1	2772.43	0					Not Found	Not Found	Not Found	High	22	57.45
FALSE	High	LGEYNIDVLEGGEQFIDASKIIRHPK	K			1	1	1	sp	2	2941.54	0				No Quan Values	Not Found	Not Found	Not Found	High	34
FALSE	High	LGGGFGGGSR	R			1	2	1	IPI00000010.1	0	864.432	0					Not Found	Not Found	Not Found	High	39	17.75
FALSE	High	LGGGFSSGGFSGGSFSR	R			1	2	1	IPI00000012.1	0	1563.72	0	331418				Peak Found	Not Found	Not Found	High	40	35.42
FALSE	High	LGGGTGSGMGTLLISK	K		1xOxidation [M9]	8	15	3	E1BJB1; F2Z5K5; F1S6M7; I3LBV1; Q2HJ81; Q767L7; F2Z571; F2Z5B2	0	1464.77	0				No Quan Values	High	Not Found	High	High	83
FALSE	High	LHFFMPG	G		1xOxidation [M5]	10	16	2	A5GFX6; E1BJB1; F2Z5K5; F1S6M7; I3LBV1; Q2HJ81; E1BJK2; Q767L7; F2Z571; F2Z5B2	0	864.407	0	408848	342427	204682	Shared	High	Peak Found	Peak Found	High	27	35.43
FALSE	High	LHFFMPG	G			10	16	1	A5GFX6; E1BJB1; F2Z5K5; F1S6M7; I3LBV1; Q2HJ81; E1BJK2; Q767L7; F2Z571; F2Z5B2	0	848.412	0		58637.8	564181	Shared	Not Found	Peak Found	Peak Found	High	22	41.93
FALSE	High	LHFFMPGF	F		1xOxidation [M5]	10	16	1	A5GFX6; E1BJB1; F2Z5K5; F1S6M7; I3LBV1; Q2HJ81; E1BJK2; Q767L7; F2Z571; F2Z5B2	0	1011.48	0				No Quan Values	Not Found	Not Found	Not Found	High	31
FALSE	High	LHFFMPGFAPL	L		1xOxidation [M5]	10	16	78	A5GFX6; E1BJB1; F2Z5K5; F1S6M7; I3LBV1; Q2HJ81; E1BJK2; Q767L7; F2Z571; F2Z5B2	0	1292.65	0	6.34046e+07	9.09861e+07	1.03185e+08	Shared	High	High	High	High	49	51.04
FALSE	High	LHFFMPGFAPL	L			10	16	15	A5GFX6; E1BJB1; F2Z5K5; F1S6M7; I3LBV1; Q2HJ81; E1BJK2; Q767L7; F2Z571; F2Z5B2	0	1276.65	0	1.11195e+06	3.74432e+06	2.01091e+07	Shared	High	High	High	High	56	57.06
FALSE	High	LHFFMPGFAPLT	T		1xOxidation [M5]	10	16	3	A5GFX6; E1BJB1; F2Z5K5; F1S6M7; I3LBV1; Q2HJ81; E1BJK2; Q767L7; F2Z571; F2Z5B2	0	1393.7	0	156100	183507		Shared	High	High	Not Found	High	27	49.35
FALSE	High	LHFFMPGFAPLT	T			10	16	2	A5GFX6; E1BJB1; F2Z5K5; F1S6M7; I3LBV1; Q2HJ81; E1BJK2; Q767L7; F2Z571; F2Z5B2	0	1377.7	0				Shared	Not Found	Not Found	Not Found	High	31	55.45
FALSE	High	LHFFMPGFAPLTAR	R		1xOxidation [M5]	3	5	140	F1S6M7; I3LBV1; Q2HJ81	0	1620.84	1	1.27417e+08	1.61714e+08	2.56116e+08	Shared	High	High	High	High	75	44.24
FALSE	High	LHFFMPGFAPLTAR	R			3	5	24	F1S6M7; I3LBV1; Q2HJ81	0	1604.84	0	4.24816e+06	1.58267e+07	80754700	Shared	High	High	High	High	70	50.46
FALSE	High	LHFFMPGFAPLTS	S			5	9	1	E1BJB1; F2Z5K5; Q767L7; F2Z571; F2Z5B2	0	1464.73	0				Shared	Not Found	Not Found	Not Found	High	46	54.81
FALSE	High	LHFFMPGFAPLTSR	R	1	1xOxidation [M5]	5	9	221	E1BJB1; F2Z5K5; Q767L7; F2Z571; F2Z5B2	0	1636.83	0	2.40603e+08	4.05411e+08	3.44554e+08	Shared	High	High	High	High	71	43.77
FALSE	High	LHFFMPGFAPLTSR	R			5	9	51	E1BJB1; F2Z5K5; Q767L7; F2Z571; F2Z5B2	0	1620.84	1	1.94847e+06	7.91057e+06	2.23932e+07	Shared	High	High	High	High	71	50.12
FALSE	High	LHVDPENFR	R			1	1	4	sp	0	1126.56	0	233308	2.26445e+06	186218		Peak Found	High	High	High	28	27.35
FALSE	High	LIFAGK	K			1	1	5	sp	0	648.408	0	1.29916e+06				Peak Found	High	Not Found	High	44	25.48
FALSE	High	LIGQIVS	S			2	8	6	F1RK98; P02550	0	729.451	0	510539	1.18987e+06	5.50723e+06	Shared	High	High	High	High	32	32.41
FALSE	High	LIGQIVSS	S			2	8	1	F1RK98; P02550	0	816.483	0			673350	Shared	Not Found	Not Found	Peak Found	High	21	31.59
FALSE	High	LIGQIVSSIT	T			2	8	1	F1RK98; P02550	0	1030.61	0				Shared	Not Found	Not Found	Not Found	High	23	44.33
FALSE	High	LIGQIVSSITA	A			2	8	1	F1RK98; P02550	0	1101.65	0	129312	243189	906066	Shared	Peak Found	Peak Found	High	High	34	45.83
FALSE	High	LIGQIVSSITAS	S			2	8	1	F1RK98; P02550	0	1188.68	0	155041	229043	1.22029e+06	Shared	Peak Found	Peak Found	Peak Found	High	23	45.57
FALSE	High	LIGQIVSSITASLR	R			2	8	188	F1RK98; P02550	0	1457.87	0	1.0222e+08	2.23056e+08	3.37402e+08	Shared	High	High	High	High	86	55.62
FALSE	High	LISQIVS	S			3	7	4	Q2HJB8; I3LDR2; F2Z5S8	0	759.461	0	1.07199e+06	1.71563e+06	8.16146e+06	Shared	Peak Found	High	High	High	21	31.36
FALSE	High	LISQIVSSIT	T			3	7	2	Q2HJB8; I3LDR2; F2Z5S8	0	1060.62	0	115306	265478	632648	Shared	Peak Found	Peak Found	High	High	23	46.17
FALSE	High	LISQIVSSITA	A			3	7	1	Q2HJB8; I3LDR2; F2Z5S8	0	1131.66	0	166283		1.21575e+06	Shared	Peak Found	Not Found	High	High	20	47.19
FALSE	High	LISQIVSSITAS	S			3	7	1	Q2HJB8; I3LDR2; F2Z5S8	0	1218.69	0	328986	511322	2856197	Shared	Peak Found	Peak Found	Peak Found	High	28	47.17
FALSE	High	LISQIVSSITASLR	R			3	7	127	Q2HJB8; I3LDR2; F2Z5S8	0	1487.88	0	1.51986e+08	2.99896e+08	4.2252e+08	Shared	High	High	High	High	90	57.06
FALSE	High	LKYENEVALR	R			1	2	35	IPI00000012.1	1	1234.68	0	106566492	92521220	31085671		High	High	High	High	67	25.34
FALSE	High	LLEGEDAH	H			2	2	1	IPI00000011.1; IPI00000013.1	0	883.416	0	147195	252755	77773.5	Shared	Peak Found	Peak Found	Peak Found	High	38	15.53
FALSE	High	LLEGEDAHL	L			2	2	2	IPI00000011.1; IPI00000013.1	0	996.5	0	128021	221349		Shared	Peak Found	High	Not Found	High	32	29.74
FALSE	High	LLEGEDAHLSSQ	Q			1	1	1	IPI00000013.1	0	1298.62	0					Not Found	Not Found	Not Found	High	36	24.8
FALSE	High	LLEGEDAHLSSQQASGQ	Q			1	1	1	IPI00000013.1	0	1769.83	0		146690			Not Found	Peak Found	Not Found	High	22	24.56
FALSE	High	LLEGEDAHLSSQQASGQS	S			1	1	2	IPI00000013.1	0	1856.86	0		423384			Not Found	High	Not Found	High	37	24.42
FALSE	High	LLEGEDAHLSSQQASGQSYSSR	R			1	1	2	IPI00000013.1	0	2350.09	0		978608			Not Found	High	Not Found	High	81	25.24
FALSE	High	LLEGEDAHLSSS	S			1	1	1	IPI00000011.1	0	1257.6	0					Not Found	Not Found	Not Found	High	17	24.84
FALSE	High	LLEGEDAHLSSSQ	Q			1	1	2	IPI00000011.1	0	1385.65	0		143435			Not Found	Peak Found	Not Found	High	27	24.56
FALSE	High	LLEGEDAHLSSSQFSSGSQSSR	R			1	1	12	IPI00000011.1	0	2309.06	0	2.53227e+06	4.6928e+06	811159		High	High	High	High	117	29.09
FALSE	High	LLEGEECR	R		1xCarbamidomethyl [C7]	4	4	11	IPI00000008.1; IPI00000005.1; sp; IPI00000007.1	0	1005.47	0	2.63804e+06	2.37225e+06	1.02548e+06	Shared	High	High	High	High	42	17.13
FALSE	High	LLEGEESR	R			4	6	4	sp; sp; IPI00000001.1; IPI00000002.1	0	932.468	0	95964.4	92577.2		Shared	High	Peak Found	Not Found	High	35	15.66
FALSE	High	LLEGEEYR	R			1	1	3	IPI00000004.1	0	1008.5	0	2.38385e+06				High	Not Found	High	High	42	22.4
FALSE	High	LLEGGQEDFESSGAGK	K			1	2	2	IPI00000010.1	0	1623.75	0					Not Found	Not Found	Not Found	High	70	27.03
FALSE	High	LLQPLNVEIDPEIQK	K			2	3	4	sp; IPI00000001.1	0	1748.98	0	674547			Shared	High	High	Not Found	High	77	44.01
FALSE	High	LLQPLNVK	K			2	2	1	IPI00000008.1; sp	0	924.588	0				Shared	Not Found	Not Found	Not Found	High	21	31.3
FALSE	High	LLRDYQELMNTK	K		1xOxidation [M9]	2	3	2	sp; IPI00000001.1	1	1539.78	0				Shared	Not Found	Not Found	Not Found	High	25	26.68
FALSE	High	LLRDYQELMNTK	K			2	3	5	sp; IPI00000001.1	1	1523.79	0	536248	344669		Shared	High	High	Not Found	High	34	34.12
FALSE	High	LLRDYQELMNVK	K		1xOxidation [M9]	4	4	1	IPI00000006.1; IPI00000008.1; sp; IPI00000007.1	1	1537.8	0	188973			Shared	Peak Found	Not Found	Not Found	High	29	30.27
FALSE	High	LLRDYQELMNVK	K			4	4	3	IPI00000006.1; IPI00000008.1; sp; IPI00000007.1	1	1521.81	0	128625			Shared	High	Not Found	Not Found	High	31	36.85
FALSE	High	LLVVYPWTQR	R			1	1	8	sp	0	1274.73	0	623234	10752387	293253		Peak Found	High	Peak Found	High	61	44.38
FALSE	High	LLYQEPVLGPVR	R			1	1	7	sp	0	1383.8	0	693752	3.80749e+06	249137		High	High	High	High	73	39.12
FALSE	High	LMYAKRAFVHWYVGEGMEEGEFSEAR	R		1xOxidation [M2]	7	16	1	F1RK98; Q2HJB8; I3LDR2; P02550; F1SHC1; F1MNF8; F2Z5S8	2	3108.43	0		65951.1	157797	Shared	Not Found	High	Peak Found	High	34	45.33
FALSE	High	LNADLR	R			10	16	1	A5GFX6; E1BJB1; F2Z5K5; F1S6M7; I3LBV1; Q2HJ81; E1BJK2; Q767L7; F2Z571; F2Z5B2	0	701.394	0	147615	244290	673904	Shared	Peak Found	Peak Found	Peak Found	High	56	17.52
FALSE	High	LNADLRK	K			10	16	4	A5GFX6; E1BJB1; F2Z5K5; F1S6M7; I3LBV1; Q2HJ81; E1BJK2; Q767L7; F2Z571; F2Z5B2	1	829.489	0	94488.9		223142	Shared	Peak Found	High	High	High	36	16.63
FALSE	High	LNDLEDALQQAK	K			2	3	23	sp; IPI00000001.1	0	1357.7	0	7.98963e+07	1.24938e+08	31757504	Shared	High	High	High	High	90	35.92
FALSE	High	LNDLEDALQQAKEDLAR	R			2	3	8	sp; IPI00000001.1	1	1941.99	0	1.31632e+06	1.43016e+06	109357	Shared	High	High	Peak Found	High	115	48.93
FALSE	High	LNDLEEALQQAK	K			2	2	22	IPI00000008.1; sp	0	1371.71	0	2.89896e+07	25165880	9246002	Shared	High	High	High	High	89	38.05
FALSE	High	LNDLEEALQQAKEDLAR	R			2	2	4	IPI00000008.1; sp	1	1956	0	299709	166569		Shared	Peak Found	High	Not Found	High	89	50.47
FALSE	High	LNFLKK	K			1	1	1	sp	1	762.487	0		629519			Not Found	High	Not Found	High	30	23.29
FALSE	High	LNVEIDPEIQK	K			2	3	1	sp; IPI00000001.1	0	1297.7	0				Shared	Not Found	Not Found	Not Found	High	31	34.58
FALSE	High	LPGVSR	R			1	1	14	IPI00000005.1	0	628.378	0	1.95092e+06	6.06751e+06	1.13377e+06		High	High	High	High	40	16.8
FALSE	High	LQAAIADAEQR	R			1	1	1	IPI00000005.1	0	1185.62	0				No Quan Values	Not Found	Not Found	Not Found	High	51
FALSE	High	LQGEIA	A			2	2	1	IPI00000008.1; sp	0	630.346	0			497243	Shared	Not Found	Not Found	Peak Found	High	25	18.36
FALSE	High	LQGEIAH	H			2	2	3	IPI00000008.1; sp	0	767.405	0	1.13807e+06	1.53156e+06	332035	Shared	High	Peak Found	Peak Found	High	25	14.03
FALSE	High	LQGEIAHVK	K			2	2	29	IPI00000008.1; sp	0	994.568	0	2.6743e+07	1.49822e+07	1.67314e+07	Shared	High	High	High	High	49	16.92
FALSE	High	LQGEIAHVKK	K			2	2	9	IPI00000008.1; sp	1	1122.66	0	742657	392749		Shared	High	High	High	High	34	14.29
FALSE	High	LQIDNAR	R			5	6	6	IPI00000012.1; IPI00000011.1; IPI00000009.1; IPI00000014.1; IPI00000013.1	0	829.453	0	1.09748e+06	1.5548e+06	307853	Shared	High	High	Peak Found	High	34	17.24
FALSE	High	LQIDPTIQR	R			1	1	2	IPI00000005.1	0	1083.62	0					Not Found	Not Found	Not Found	High	34	29.36
FALSE	High	LQITAGR	R			2	3	1	sp; IPI00000001.1	0	758.452	0				No Quan Values	Not Found	Not Found	Not Found	High	18
FALSE	High	LQPLNVEIDPEIQK	K			2	3	1	sp; IPI00000001.1	0	1635.9	0				Shared	Not Found	Not Found	Not Found	High	61	40.48
FALSE	High	LQQSISDAEQR	R			2	3	6	sp; IPI00000001.1	0	1274.63	0		383601		Shared	High	High	Not Found	High	76	17.99
FALSE	High	LQQVDTSTR	R			2	3	3	sp; IPI00000001.1	0	1047.54	0				Shared	Not Found	Not Found	Not Found	High	32	15.17
FALSE	High	LRAEIENIK	K			1	1	1	IPI00000004.1	1	1085.63	0	453087				High	Not Found	Not Found	High	24	23.6
FALSE	High	LRAEIENIKK	K			1	1	2	IPI00000004.1	2	1213.73	0	1.27215e+06				High	Not Found	Not Found	High	43	19.66
FALSE	High	LRFEGALNVDLVEFQTNLVPYPR	R			1	1	1	F1RYV9	1	2690.43	0				No Quan Values	Not Found	Not Found	Not Found	High	49
FALSE	High	LRSEIDNVK	K			2	3	11	sp; IPI00000001.1	1	1073.59	0	9639955	14138148	5.69616e+06	Shared	High	High	High	High	32	17.31
FALSE	High	LRSEIDNVKK	K			2	3	24	sp; IPI00000001.1	2	1201.69	0	1.41054e+07	2.73655e+07	4.23608e+06	Shared	High	High	High	High	50	14.62
FALSE	High	LRVDPVNFK	K			1	1	6	sp	1	1087.63	0	266368		139779		High	High	Peak Found	High	42	29.9
FALSE	High	LSDQCTGLQGFLVF	F		1xCarbamidomethyl [C5]	1	1	5	F2Z5S8	0	1584.77	1	488950	844976	5754025		Peak Found	High	High	High	55	57.97
FALSE	High	LSDQCTGLQGFLVFH	H		1xCarbamidomethyl [C5]	1	1	13	F2Z5S8	0	1721.83	0	1.42078e+06	2.03026e+06	9.57867e+06		High	High	High	High	66	50.36
FALSE	High	LSDQCTGLQGFLVFHSF	F		1xCarbamidomethyl [C5]	1	1	3	F2Z5S8	0	1955.93	0	164999	267959	1.91086e+06		Peak Found	Peak Found	High	High	32	55.83
FALSE	High	LSDQCTGLQGFLVFHSFGGGTGSGF	F		1xCarbamidomethyl [C5]	1	1	1	F2Z5S8	0	2576.19	0			237847		Not Found	Not Found	High	High	29	56.34
FALSE	High	LSDQCTGLQGFLVFHSFGGGTGSGFTSLLMER	R		1xCarbamidomethyl [C5]; 1xOxidation [M30]	1	1	16	F2Z5S8	0	3422.61	0	810942	2.67657e+06	4.27709e+06		High	High	High	High	97	57.66
FALSE	High	LSLDYGK	K			2	3	7	Q2HJB8; I3LDR2	0	795.425	0	2182297			Shared	High	High	High	High	53	25.28
FALSE	High	LSLDYGKK	K			2	3	4	Q2HJB8; I3LDR2	1	923.52	0	928440		386984	Shared	High	Not Found	High	High	28	21.75
FALSE	High	LSNTTAIAEAWAR	R			7	15	13	F1RK98; Q2HJB8; I3LDR2; P02550; F1SHC1; F1MNF8; F2Z5S8	0	1403.73	0	2.74139e+06	6061259	13750090	Shared	High	High	High	High	85	37.06
FALSE	High	LSSPATLNSR	R			1	1	38	sp	0	1045.56	0	2.33998e+08	2.16852e+08	3.37935e+08		High	High	High	High	60	20.76
FALSE	High	LSVDYGK	K			6	17	78	F1RK98; P02550; A7E1S5; F1SHC1; F1MNF8; F2Z5S8	0	781.409	0	2.85911e+08	6.79623e+08	9.42608e+08	Shared	High	High	High	High	55	19.68
FALSE	High	LSVDYGKK	K			6	17	39	F1RK98; P02550; A7E1S5; F1SHC1; F1MNF8; F2Z5S8	1	909.504	0	1.25469e+08	4.54916e+08	4.06328e+08	Shared	High	High	High	High	52	16.83
FALSE	High	LTEELAYLK	K			1	2	1	IPI00000012.1	0	1079.6	0	90606.3	52088.7			Peak Found	Peak Found	Not Found	High	58	34.91
FALSE	High	LTTDNANILLQIDNAR	R			1	2	3	IPI00000012.1	0	1784.95	0	314964				High	Not Found	Not Found	High	115	43.15
FALSE	High	LTTPTYG	G			8	13	1	A5GFX6; E1BJB1; F2Z5K5; I3LBV1; Q2HJ81; Q767L7; F2Z571; F2Z5B2	0	752.383	0				Shared	Not Found	Not Found	Not Found	High	21	23.9
FALSE	High	LTTPTYGDLNH	H			8	13	1	A5GFX6; E1BJB1; F2Z5K5; I3LBV1; Q2HJ81; Q767L7; F2Z571; F2Z5B2	0	1231.6	0			223104	Shared	Not Found	Not Found	High	High	31	28.5
FALSE	High	LTTPTYGDLNHLVSATM	M		1xOxidation [M17]	7	12	1	E1BJB1; F2Z5K5; I3LBV1; Q2HJ81; Q767L7; F2Z571; F2Z5B2	0	1849.9	0	2401399	2.71197e+06	5.04704e+06	Shared	Peak Found	Peak Found	Peak Found	High	38	42.28
FALSE	High	LTTPTYGDLNHLVSATMSGVTTC	C		1xCarbamidomethyl [C23]; 1xOxidation [M17]	5	9	1	E1BJB1; F2Z5K5; Q767L7; F2Z571; F2Z5B2	0	2455.15	0	437187		1330812	Shared	Peak Found	Not Found	High	High	19	44.87
FALSE	High	LTTPTYGDLNHLVSATMSGVTTCLR	R		1xCarbamidomethyl [C23]; 1xOxidation [M17]	5	9	209	E1BJB1; F2Z5K5; Q767L7; F2Z571; F2Z5B2	0	2724.33	0	1.97758e+08	2.36801e+08	2.88932e+08	Shared	High	High	High	High	128	47.44
FALSE	High	LTTPTYGDLNHLVSATMSGVTTCLR	R		1xCarbamidomethyl [C23]	5	9	69	E1BJB1; F2Z5K5; Q767L7; F2Z571; F2Z5B2	0	2708.34	0	3.67002e+07	8.22329e+07	1.76304e+08	Shared	High	High	High	High	143	55.23
FALSE	High	LTTPTYGDLNHLVSATMSGVTTCLRFPGQLNADLR	R		1xCarbamidomethyl [C23]; 1xOxidation [M17]	5	9	3	E1BJB1; F2Z5K5; Q767L7; F2Z571; F2Z5B2	1	3835.91	0		765531	99229.5	Shared	Not Found	High	Peak Found	High	21	53.21
FALSE	High	LTVAAIFR	R			2	2	2	E1BJB1; F2Z5B2	0	890.546	0				No Quan Values	Not Found	Not Found	High	High	45
FALSE	High	LTVATVFR	R			2	3	1	F1S6M7; I3LBV1	0	906.541	0				Shared	Not Found	Not Found	Not Found	High	25	36.07
FALSE	High	LVAASQAALGL	L			1	1	3	sp	0	1013.6	0	667009	277348	180335		High	Peak Found	Peak Found	High	33	39.43
FALSE	High	LVFHSFGGGTGSGFTSLLMER	R		1xOxidation [M19]	4	11	14	A7E1S5; F1SHC1; F1MNF8; F2Z5S8	0	2216.08	0	3.8074e+06	6.80711e+06	2.56076e+07	Shared	High	High	High	High	94	47.58
FALSE	High	LVFHSFGGGTGSGFTSLLMER	R			4	11	2	A7E1S5; F1SHC1; F1MNF8; F2Z5S8	0	2200.09	0			2.26972e+06	Shared	Not Found	Not Found	High	High	116	49.9
FALSE	High	LVNEVTEFAK	K			1	1	5	sp	0	1149.62	0	848006	1.28362e+06			High	High	Not Found	High	70	31.96
FALSE	High	LVNLGGSK	K			2	3	1	sp; IPI00000001.1	0	787.467	0				No Quan Values	Not Found	Not Found	Not Found	High	36
FALSE	High	LVPYPR	R			9	19	10	F1RK98; G5E6J5; Q2HJB8; I3LDR2; P02550; F1SHC1; F1MNF8; F1RYV9; F2Z5S8	0	744.44	0	1.17739e+07	2.80203e+07	201142922	Shared	High	High	High	High	31	22.51
FALSE	High	LVSATMSGVTTCLR	R		1xCarbamidomethyl [C12]	5	9	1	E1BJB1; F2Z5K5; Q767L7; F2Z571; F2Z5B2	0	1495.76	0				No Quan Values	Not Found	Not Found	High	High	42
FALSE	High	LVTDLTK	K			2	2	5	sp; sp	0	789.472	0	999575	1.40058e+06	621684	Shared	High	High	High	High	44	21.8
FALSE	High	LYQEPVLGPVR	R			1	1	1	sp	0	1270.72	0		729994			Not Found	High	Not Found	High	34	33.65
FALSE	High	MAACDPR	R		1xCarbamidomethyl [C4]	9	12	2	E1BJB1; F2Z5K5; F1S6M7; I3LBV1; Q2HJ81; E1BJK2; Q767L7; F2Z571; F2Z5B2	0	820.344	0	258600	538505	1.71526e+06	Shared	Peak Found	High	High	High	35	11.41
FALSE	High	MAALEK	K			4	10	3	P02550; F1SHC1; F1MNF8; F2Z5S8	0	662.354	0		196299	379267	Shared	Not Found	High	High	High	25	14.3
FALSE	High	MAATFIGN	N			2	2	1	F2Z5K5; I3LBV1	0	824.397	0		179289	1.39575e+06	Shared	Not Found	Peak Found	High	High	17	31.87
FALSE	High	MAATFIGNSTAIQELFK	K	1	1xOxidation [M1]	2	2	84	F2Z5K5; I3LBV1	0	1857.94	9	2.80127e+07	5.11417e+07	1.09556e+08	Shared	High	High	High	High	105	53.24
FALSE	High	MAATFIGNSTAIQELFK	K			2	2	13	F2Z5K5; I3LBV1	0	1841.95	0	417693	1.45337e+06	8.73476e+06	Shared	Peak Found	High	High	High	92	53.63
FALSE	High	MAATFIGNSTAIQELFKR	R		1xOxidation [M1]	2	2	4	F2Z5K5; I3LBV1	1	2014.04	1	150253	689457		Shared	Peak Found	High	Peak Found	High	102	49.85
FALSE	High	MAMQNLNDR	R		1xOxidation [M3]	1	1	1	IPI00000015.1	0	1108.49	0			706293		Not Found	Not Found	High	High	34	20.73
FALSE	High	MAVTFIGNSTAIQELFK	K		1xOxidation [M1]	1	1	23	Q767L7	0	1885.97	0	5.0473e+06	3.70841e+06	5.84211e+06		High	High	High	High	101	53.19
FALSE	High	MAVTFIGNSTAIQELFK	K			1	1	3	Q767L7	0	1869.98	0	172606	530672	913064		Peak Found	Peak Found	High	High	83	55.75
FALSE	High	MAVTFIGNSTAIQELFKR	R		1xOxidation [M1]	1	1	1	Q767L7	1	2042.07	0		133910			Not Found	High	Not Found	High	77	49.8
FALSE	High	MFLSFPTTK	K		1xOxidation [M1]	1	1	1	sp	0	1087.55	0				No Quan Values	Not Found	High	Not Found	High	33
FALSE	High	MIQEQISNLEAQITDVR	R		1xOxidation [M1]	1	2	5	IPI00000010.1	0	2004.01	0	168976				High	High	Not Found	High	145	46.68
FALSE	High	MLLDIK	K		1xOxidation [M1]	1	1	4	sp	0	748.427	0	2.63101e+06				High	Not Found	Not Found	High	34	29.75
FALSE	High	MLSNTTAIAEAWAR	R		1xOxidation [X/M]	7	15	48	F1RK98; Q2HJB8; I3LDR2; P02550; F1SHC1; F1MNF8; F2Z5S8	0	1550.76	0	5.40031e+06	1.06032e+07	2.0395e+07	Shared	High	High	High	High	109	38.38
FALSE	High	MLSNTTAIAEAWAR	R			7	15	20	F1RK98; Q2HJB8; I3LDR2; P02550; F1SHC1; F1MNF8; F2Z5S8	0	1534.77	0		1.08004e+06	1.02315e+07	Shared	High	High	High	High	88	41.27
FALSE	High	MMAACDPR	R		1xCarbamidomethyl [C5]; 2xOxidation [M1; M2]	8	11	1	E1BJB1; F2Z5K5; F1S6M7; I3LBV1; Q2HJ81; Q767L7; F2Z571; F2Z5B2	0	983.374	0	128964	337569	1.05434e+06	Shared	Peak Found	Peak Found	High	High	31	16.28
FALSE	High	MMAACDPR	R		1xCarbamidomethyl [C5]	8	11	4	E1BJB1; F2Z5K5; F1S6M7; I3LBV1; Q2HJ81; Q767L7; F2Z571; F2Z5B2	0	951.385	0	820358	2.32917e+06	5.53025e+06	Shared	High	Peak Found	High	High	42	16.27
FALSE	High	MNAAPGVDLTQLLNNMR	R		2xOxidation [M1; M16]	1	2	2	IPI00000012.1	0	1889.92	0					Not Found	Not Found	Not Found	High	55	43.16
FALSE	High	MPGFAPLTAR	R		1xOxidation [M1]	3	5	3	F1S6M7; I3LBV1; Q2HJ81	0	1076.56	0	135526			Shared	Peak Found	Not Found	Not Found	High	50	30.99
FALSE	High	MPGFAPLTAR	R			3	5	1	F1S6M7; I3LBV1; Q2HJ81	0	1060.56	0				Shared	Not Found	Not Found	Not Found	High	44	36.84
FALSE	High	MPGFAPLTSR	R		1xOxidation [M1]	5	9	6	E1BJB1; F2Z5K5; Q767L7; F2Z571; F2Z5B2	0	1092.55	0	393537	409221	552595	Shared	High	Peak Found	High	High	61	30.02
FALSE	High	MPGFAPLTSR	R			5	9	5	E1BJB1; F2Z5K5; Q767L7; F2Z571; F2Z5B2	0	1076.56	0	264633	513556	4071459	Shared	High	High	High	High	50	36
FALSE	High	MQDMVEDYR	R		2xOxidation [M1; M4]	2	3	1	sp; IPI00000001.1	0	1218.48	0				No Quan Values	Not Found	Not Found	Not Found	High	48
FALSE	High	MQIFVK	K			1	1	3	sp	0	765.433	0	74224.2	283224			Peak Found	High	Not Found	High	28	29.87
FALSE	High	MRECISIH	H		1xCarbamidomethyl [C4]; 1xOxidation [M1]	5	11	2	F1RK98; P02550; A7E1S5; F1SHC1; F1MNF8	1	1061.49	0		367328	394689	Shared	Not Found	Peak Found	High	High	28	17.85
FALSE	High	MREIVHIQAGQCGN	N		1xCarbamidomethyl [C12]; 1xOxidation [M1]	7	12	10	E1BJB1; F2Z5K5; F1S6M7; Q2HJ81; Q767L7; F2Z571; F2Z5B2	1	1628.76	0		275011	303930	Shared	Not Found	High	High	High	48	21.78
FALSE	High	MREIVHIQAGQCGNQIGAK	K		1xCarbamidomethyl [C12]; 1xOxidation [M1]	6	11	38	E1BJB1; F2Z5K5; F1S6M7; Q767L7; F2Z571; F2Z5B2	1	2126.06	0	3.484e+06	5.79998e+06	3.83971e+06	Shared	High	High	High	High	86	24.1
FALSE	High	MREIVHIQAGQCGNQIGAK	K		1xCarbamidomethyl [C12]	6	11	4	E1BJB1; F2Z5K5; F1S6M7; Q767L7; F2Z571; F2Z5B2	1	2110.06	0		1.31099e+06	466766	Shared	Not Found	High	Peak Found	High	55	27.01
FALSE	High	MSATFIGN	N		1xOxidation [M1]	4	6	2	E1BJB1; Q2HJ81; F2Z571; F2Z5B2	0	856.387	0	684504	703629	1.28409e+06	Shared	Peak Found	Peak Found	Peak Found	High	28	25.36
FALSE	High	MSATFIGNSTAIQELFK	K	1	1xOxidation [M1]	4	6	133	E1BJB1; Q2HJ81; F2Z571; F2Z5B2	0	1873.94	5	1.32072e+08	1.77612e+08	2.64174e+08	Shared	High	High	High	High	105	51.05
FALSE	High	MSATFIGNSTAIQELFK	K	1		4	6	78	E1BJB1; Q2HJ81; F2Z571; F2Z5B2	0	1857.94	0				No Quan Values	High	High	High	High	105	53.24
FALSE	High	MSATFIGNSTAIQELFKR	R		1xOxidation [M1]	4	6	13	E1BJB1; Q2HJ81; F2Z571; F2Z5B2	1	2030.04	2	1.75023e+06	6.69195e+06	968664	Shared	High	High	High	High	115	47.63
FALSE	High	MSATFIGNSTAIQELFKR	R			4	6	5	E1BJB1; Q2HJ81; F2Z571; F2Z5B2	1	2014.04	1		513002	659159	Shared	Peak Found	High	High	High	102	49.85
FALSE	High	MSGDLSSNVTVSVTSSTISSNVASK	K		1xOxidation [M1]	2	2	19	IPI00000008.1; sp	0	2474.19	0	3.73013e+06	2.83312e+06	611368	Shared	High	High	High	High	126	35.8
FALSE	High	MSGECAPNVSVSVSTSHTTISGGGSR	R		1xCarbamidomethyl [C5]; 1xOxidation [M1]	2	3	10	sp; IPI00000001.1	0	2581.16	0	2.82299e+06	3.41417e+06	739819	Shared	High	High	High	High	126	27.7
FALSE	High	MSGECAPNVSVSVSTSHTTISGGGSR	R		1xCarbamidomethyl [C5]	2	3	3	sp; IPI00000001.1	0	2565.17	0	170119	903576	816675	Shared	Peak Found	High	High	High	101	29.03
FALSE	High	MSGVTTCLR	R		1xCarbamidomethyl [C7]; 1xOxidation [M1]	5	9	2	E1BJB1; F2Z5K5; Q767L7; F2Z571; F2Z5B2	0	1040.49	0				Shared	Not Found	Not Found	Not Found	High	47	18.93
FALSE	High	MSGVTTSLR	R		1xOxidation [M1]	4	6	7	A5GFX6; F1S6M7; I3LBV1; Q2HJ81	0	967.488	0	726707	260549	901055	Shared	High	High	High	High	44	18.23
FALSE	High	MSGVTTSLR	R			4	6	5	A5GFX6; F1S6M7; I3LBV1; Q2HJ81	0	951.493	0	878524	1.00998e+06	4.20238e+06	Shared	High	High	High	High	51	22.59
FALSE	High	MSMKEVDEQMLNVQNK	K		3xOxidation [M1; M3; M10]	4	5	3	E1BJB1; Q767L7; F2Z571; F2Z5B2	1	1971.88	0				Shared	Not Found	Not Found	Not Found	High	44	19.58
FALSE	High	MSMKEVDEQMLNVQNK	K		1xOxidation [M]	4	5	2	E1BJB1; Q767L7; F2Z571; F2Z5B2	1	1939.89	0				No Quan Values	Not Found	Not Found	Not Found	High	57
FALSE	High	MSMKEVDEQMLSVQSKNSSYFVEWIPNNVK	K		2xOxidation [M]	1	1	3	F2Z5K5	2	3579.68	0				No Quan Values	Not Found	Not Found	High	High	24
FALSE	High	MSSTFIGNSTAIQELFK	K	1	1xOxidation [M1]	1	2	63	F1S6M7	0	1889.93	0	1.7683e+08	1.35242e+08	1.87211e+08		High	High	High	High	109	50.49
FALSE	High	MSSTFIGNSTAIQELFK	K			1	2	16	F1S6M7	0	1873.94	0				No Quan Values	High	High	High	High	79	51.05
FALSE	High	MSSTFIGNSTAIQELFKR	R		1xOxidation [M1]	1	2	7	F1S6M7	1	2046.03	0	1.72968e+06	2.51854e+06	871138		High	High	Peak Found	High	67	46.98
FALSE	High	MSSTFIGNSTAIQELFKR	R			1	2	3	F1S6M7	1	2030.04	0				No Quan Values	Peak Found	High	Peak Found	High	99	47.32
FALSE	High	MSVEADINGLR	R		1xOxidation [M1]	1	1	3	IPI00000011.1	0	1220.59	0	1.39871e+06	1.86894e+06			Peak Found	High	Not Found	High	72	31.18
FALSE	High	MSVEADINGLR	R			1	1	2	IPI00000011.1	0	1204.6	0		255472			Not Found	High	Not Found	High	77	35.03
FALSE	High	MSVEADINGLRR	R		1xOxidation [M1]	1	1	2	IPI00000011.1	1	1376.7	0	385184	377901			Peak Found	High	Not Found	High	31	28.91
FALSE	High	MTLDDFR	R		1xOxidation [M1]	1	2	59	IPI00000010.1	0	913.408	0	2.8386e+07	3.27586e+07	9.38146e+06		High	High	High	High	59	25.07
FALSE	High	MTLDDFR	R			1	2	12	IPI00000010.1	0	897.413	0	4.86836e+06	1.76957e+07	7958582		High	High	High	High	47	33.19
FALSE	High	MVDNEAIYDICR	R		1xCarbamidomethyl [C11]; 1xOxidation [M1]	7	18	24	F1RK98; Q2HJB8; I3LDR2; P02550; F1SHC1; F1MNF8; F2Z5S8	0	1514.66	0	3.15238e+06	4.95389e+06	7.49586e+06	Shared	High	High	High	High	92	32.63
FALSE	High	MVDNEAIYDICR	R		1xCarbamidomethyl [C11]	7	18	7	F1RK98; Q2HJB8; I3LDR2; P02550; F1SHC1; F1MNF8; F2Z5S8	0	1498.67	0	233204	1654773	2.59758e+07	Shared	High	Peak Found	High	High	86	34.99
FALSE	High	MVPFPR	R		1xOxidation [M1]	10	16	71	A5GFX6; E1BJB1; F2Z5K5; F1S6M7; I3LBV1; Q2HJ81; E1BJK2; Q767L7; F2Z571; F2Z5B2	0	762.397	0	5.13635e+07	3.81661e+07	70558136	Shared	High	High	High	High	38	24.69
FALSE	High	MVPFPR	R			10	16	11	A5GFX6; E1BJB1; F2Z5K5; F1S6M7; I3LBV1; Q2HJ81; E1BJK2; Q767L7; F2Z571; F2Z5B2	0	746.402	0	12980581	34860188	267069856	Shared	High	High	High	High	36	28.88
FALSE	High	NAAIATIK	K			4	11	4	F1RK98; P02550; F1SHC1; F1MNF8	0	801.483	0	192342	380661	597903	Shared	High	High	High	High	66	30.16
FALSE	High	NAAPGVDLTQLLNNMR	R		1xOxidation [M15]	1	2	2	IPI00000012.1	0	1742.89	0					High	Not Found	Not Found	High	77	43.82
FALSE	High	NATLSVHQLVENTDETYCIDNEALYDICFR	R		2xCarbamidomethyl [C18; C28]	6	10	1	F2Z5K5; I3LBV1; Q2HJ81; Q767L7; F2Z571; F2Z5B2	0	3603.64	0			646528	Shared	Not Found	Not Found	High	High	61	53.05
FALSE	High	NATLSVHQLVENTDETYSIDNEALYDICFR	R		1xCarbamidomethyl [C28]	1	2	2	E1BJB1	0	3530.64	0	103891	377786	2123792		Peak Found	Peak Found	High	High	80	52.55
FALSE	High	NAVPITPTLNR	R			1	1	6	sp	0	1195.68	0	1.95088e+06	11296989	414946		High	High	Peak Found	High	40	29.45
FALSE	High	NEAIYDICR	R		1xCarbamidomethyl [C8]	7	18	1	F1RK98; Q2HJB8; I3LDR2; P02550; F1SHC1; F1MNF8; F2Z5S8	0	1153.53	0				Shared	Not Found	Not Found	Not Found	High	36	29.41
FALSE	High	NEALYDICFR	R		1xCarbamidomethyl [C8]	9	15	1	E1BJB1; F2Z5K5; F1S6M7; I3LBV1; Q2HJ81; E1BJK2; Q767L7; F2Z571; F2Z5B2	0	1300.6	0				Shared	Not Found	Not Found	Not Found	High	47	40.54
FALSE	High	NEINELTR	R			1	1	1	sp	0	988.506	0					Not Found	Not Found	Not Found	High	30	23.98
FALSE	High	NEVALR	R			1	2	2	IPI00000012.1	0	701.394	0					Not Found	Not Found	Not Found	High	25	14.92
FALSE	High	NFIFGQSGAGNNWAK	K			1	2	3	F1S6M7	0	1610.77	0					High	Not Found	High	High	65	40.2
FALSE	High	NFVAFVDK	K			1	1	1	sp	0	939.493	0	176003	149414			High	Peak Found	Not Found	High	30	34.67
FALSE	High	NFVFGQSGAGNNWAK	K			5	9	4	E1BJB1; F2Z5K5; Q767L7; F2Z571; F2Z5B2	0	1596.76	0	383600	547706	857778	Shared	High	High	High	High	63	37.93
FALSE	High	NHEEEMKDLR	R		1xOxidation [M6]	1	2	16	IPI00000012.1	1	1316.59	0	2.33401e+06	5.73174e+06	1.37958e+06		High	High	High	High	55	9.52
FALSE	High	NHEEEMKDLR	R			1	2	14	IPI00000012.1	1	1300.6	0	1.16618e+07	1.16914e+07	5.68665e+06		High	High	High	High	60	15.64
FALSE	High	NHEEEMLALR	R		1xOxidation [M6]	1	1	1	IPI00000013.1	0	1257.59	0				No Quan Values	Not Found	High	Not Found	High	38
FALSE	High	NHEEEMLALR	R			1	1	3	IPI00000013.1	0	1241.59	0		1.09854e+06			Not Found	High	Not Found	High	48	27.94
FALSE	High	NHEEEMNALR	R		1xOxidation [M6]	1	1	6	IPI00000011.1	0	1258.55	0	188697	337510			High	High	Not Found	High	40	12.04
FALSE	High	NHEEEMNALR	R			1	1	13	IPI00000011.1	0	1242.55	0	1.37595e+06	3.93252e+06	525129		High	High	High	High	53	18.39
FALSE	High	NHKEEMSQLTGQNSGDVNVEINVAPGK	K		1xOxidation [M6]	1	2	18	IPI00000010.1	1	2911.39	0	4.3085e+06	6.19126e+06	634576		High	High	High	High	105	29.34
FALSE	High	NHKEEMSQLTGQNSGDVNVEINVAPGK	K			1	2	7	IPI00000010.1	1	2895.39	0	420234	2.55967e+06	863432		Peak Found	High	High	High	137	32.59
FALSE	High	NHKEEMSQLTGQNSGDVNVEINVAPGKDLTK	K		1xOxidation [M6]	1	2	5	IPI00000010.1	2	3368.64	0	866483	917556			High	Peak Found	Not Found	High	66	31.52
FALSE	High	NIDVLEGNEQFINAAK	K			1	1	2	sp	0	1774.9	0	629108	311435			High	Peak Found	Not Found	High	77	41.15
FALSE	High	NIEQISSYK	K			1	2	1	IPI00000012.1	0	1081.55	0					Not Found	Not Found	Not Found	High	52	24.99
FALSE	High	NILLQIDNAR	R			1	2	1	IPI00000012.1	0	1169.66	0	722286	855563	879746		Peak Found	Peak Found	Peak Found	High	51	38.01
FALSE	High	NKLEGLEDALQK	K			1	1	3	IPI00000005.1	1	1357.73	0	1.77622e+06	3206608	778256		High	High	Peak Found	High	43	33.04
FALSE	High	NKLNDLEDALQQAK	K			2	3	17	sp; IPI00000001.1	1	1599.83	0	14562228	10522388	2.30619e+06	Shared	High	High	High	High	87	37.99
FALSE	High	NKLNDLEDALQQAKEDLAR	R			2	3	9	sp; IPI00000001.1	2	2184.13	0	2.43776e+06	1.80316e+06		Shared	High	Peak Found	Not Found	High	100	49.26
FALSE	High	NKLNDLEEALQQAK	K			2	2	16	IPI00000008.1; sp	1	1613.85	0	6446110	3.14619e+06	705886	Shared	High	High	High	High	74	39.57
FALSE	High	NKLNDLEEALQQAKEDLAR	R			2	2	9	IPI00000008.1; sp	2	2198.14	0	786087	373886		Shared	High	High	Not Found	High	88	50.01
FALSE	High	NKPGVYTK	K			1	2	2	sp	0	906.504	0	332684	1.09295e+06	1.65628e+06		Peak Found	Peak Found	High	High	25	9.39
FALSE	High	NKYEDEINK	K			4	5	3	sp; IPI00000001.1; IPI00000005.1; IPI00000002.1	1	1152.55	0	3.09055e+06	5894159	779212	Shared	High	High	Peak Found	High	43	16.15
FALSE	High	NKYEDEINKR	R			4	5	26	sp; IPI00000001.1; IPI00000005.1; IPI00000002.1	2	1308.65	0	76758984	98622566	3.34522e+07	Shared	High	High	High	High	53	16.56
FALSE	High	NLDIER	R			7	18	10	F1RK98; Q2HJB8; I3LDR2; P02550; F1SHC1; F1MNF8; F2Z5S8	0	759.4	0	2.12336e+07	68409965	149575924	Shared	High	High	High	High	42	19.61
FALSE	High	NLDIERPT	T			7	18	4	F1RK98; Q2HJB8; I3LDR2; P02550; F1SHC1; F1MNF8; F2Z5S8	0	957.5	0	180216	634737	1.60553e+06	Shared	Peak Found	Peak Found	High	High	29	24.61
FALSE	High	NLDIERPTY	Y			7	18	7	F1RK98; Q2HJB8; I3LDR2; P02550; F1SHC1; F1MNF8; F2Z5S8	0	1120.56	0	475592		2.44056e+06	Shared	High	High	High	High	33	31.07
FALSE	High	NLDIERPTYT	T			6	17	3	F1RK98; Q2HJB8; I3LDR2; P02550; F1SHC1; F2Z5S8	0	1221.61	0	403241		1.56321e+06	Shared	Peak Found	High	High	High	33	30.36
FALSE	High	NLDIERPTYTN	N			6	17	8	F1RK98; Q2HJB8; I3LDR2; P02550; F1SHC1; F2Z5S8	0	1335.65	0	681123	2.40697e+06	4.73001e+06	Shared	High	High	High	High	46	29.08
FALSE	High	NLDIERPTYTNL	L			6	17	5	F1RK98; Q2HJB8; I3LDR2; P02550; F1SHC1; F2Z5S8	0	1448.74	0	914165	2.32821e+06	6.09565e+06	Shared	High	High	High	High	26	37.9
FALSE	High	NLDIERPTYTNLN	N			6	17	9	F1RK98; Q2HJB8; I3LDR2; P02550; F1SHC1; F2Z5S8	0	1562.78	0	235579	969689	2.6618e+06	Shared	High	High	High	High	40	34.58
FALSE	High	NLDIERPTYTNLNR	R			6	17	150	F1RK98; Q2HJB8; I3LDR2; P02550; F1SHC1; F2Z5S8	0	1718.88	0	3.83416e+08	6.18501e+08	7.91273e+08	Shared	High	High	High	High	66	31.07
FALSE	High	NLDLDSIIAEVK	K			3	3	30	IPI00000008.1; IPI00000005.1; sp	0	1329.73	0	7.4538e+07	7.3736e+07	1.60772e+07	Shared	High	High	High	High	87	50.94
FALSE	High	NLDLDSIIAEVR	R			1	1	3	IPI00000004.1	0	1357.73	0	5.5749e+06				High	Not Found	High	High	74	51.75
FALSE	High	NLEPIFQGYIDSLK	K			2	2	1	IPI00000008.1; sp	0	1636.86	0				Shared	Not Found	Not Found	Not Found	High	46	52.46
FALSE	High	NLEPIFQGYIDSLKR	R			2	2	1	IPI00000008.1; sp	1	1792.96	0				Shared	Not Found	Not Found	Not Found	High	43	49.28
FALSE	High	NLEPLFETYLSVLR	R			1	1	2	IPI00000004.1	0	1693.92	0				No Quan Values	High	Not Found	Not Found	High	88
FALSE	High	NLPPLTADFAEDKDVCK	K		1xCarbamidomethyl [C16]	1	1	1	sp	1	1932.94	0		326168			Not Found	High	Not Found	High	65	37.89
FALSE	High	NLQIDPTIQR	R			1	1	4	IPI00000005.1	0	1197.66	0	203178	528736			High	High	Not Found	High	61	30.59
FALSE	High	NLQQSISDAEQR	R			2	3	1	sp; IPI00000001.1	0	1388.68	0				Shared	Not Found	Not Found	Not Found	High	66	27.92
FALSE	High	NLTTDNANILLQIDNAR	R			1	2	2	IPI00000012.1	0	1898.99	0					Not Found	Not Found	Not Found	High	133	44.55
FALSE	High	NLVPYPR	R			9	19	4	F1RK98; G5E6J5; Q2HJB8; I3LDR2; P02550; F1SHC1; F1MNF8; F1RYV9; F2Z5S8	0	858.483	0	265153	684717	2834272	Shared	Peak Found	Peak Found	High	High	35	28
FALSE	High	NMAINPSK	K			1	1	2	sp	0	874.445	0	184722	1.80282e+06			Peak Found	High	Not Found	High	53	16.82
FALSE	High	NMMAAC	C		1xCarbamidomethyl [C6]	8	11	1	E1BJB1; F2Z5K5; F1S6M7; I3LBV1; Q2HJ81; Q767L7; F2Z571; F2Z5B2	0	697.247	0				No Quan Values	Not Found	Not Found	Not Found	High	17
FALSE	High	NMMAACD	D		1xCarbamidomethyl [C6]	8	11	5	E1BJB1; F2Z5K5; F1S6M7; I3LBV1; Q2HJ81; Q767L7; F2Z571; F2Z5B2	0	812.274	0	745124	2.17146e+06	3.58891e+06	Shared	Peak Found	High	High	High	32	18.17
FALSE	High	NMMAACDPR	R		1xCarbamidomethyl [C6]; 2xOxidation [M2; M3]	8	11	46	E1BJB1; F2Z5K5; F1S6M7; I3LBV1; Q2HJ81; Q767L7; F2Z571; F2Z5B2	0	1097.42	0	3.10557e+07	4.41371e+07	9.46005e+07	Shared	High	High	High	High	59	18.95
FALSE	High	NMMAACDPR	R		1xCarbamidomethyl [C6]; 1xOxidation [M]	8	11	157	E1BJB1; F2Z5K5; F1S6M7; I3LBV1; Q2HJ81; Q767L7; F2Z571; F2Z5B2	0	1081.42	0	7.51294e+07	7.94347e+07	4.59901e+07	Shared	High	High	High	High	64	13.91
FALSE	High	NMMAACDPR	R		1xCarbamidomethyl [C6]	8	11	31	E1BJB1; F2Z5K5; F1S6M7; I3LBV1; Q2HJ81; Q767L7; F2Z571; F2Z5B2	0	1065.43	0	1.12391e+08	2.75379e+08	5.56458e+08	Shared	High	High	High	High	46	18.94
FALSE	High	NMQDMVEDYR	R		2xOxidation [M2; M5]	2	3	95	sp; IPI00000001.1	0	1332.52	0	1.53464e+07	1.41257e+07	2.44375e+06	Shared	High	High	High	High	63	19.01
FALSE	High	NMQDMVEDYR	R		1xOxidation [M]	2	3	67	sp; IPI00000001.1	0	1316.52	0	1.9348e+07	3.74946e+07	1.10473e+07	Shared	High	High	High	High	68	25.87
FALSE	High	NMQDMVEDYR	R			2	3	3	sp; IPI00000001.1	0	1300.53	0		4.79704e+06	3.46534e+06	Shared	Not Found	Peak Found	Peak Found	High	58	32.32
FALSE	High	NNIEQISSYK	K			1	2	1	IPI00000012.1	0	1195.6	0				No Quan Values	Not Found	Not Found	Not Found	High	50
FALSE	High	NNQFASFIDK	K			2	3	1	sp; IPI00000001.1	0	1183.57	0				Shared	Not Found	Not Found	Not Found	High	50	35.75
FALSE	High	NQFASFIDK	K			2	3	2	sp; IPI00000001.1	0	1069.53	0	184297	279692		Shared	Peak Found	Peak Found	Not Found	High	40	35.29
FALSE	High	NQILNL	L			1	2	1	IPI00000012.1	0	714.414	0				No Quan Values	Not Found	Not Found	Not Found	High	18
FALSE	High	NQILNLTTDNAN	N			1	2	2	IPI00000012.1	0	1330.66	0	2.15345e+06	2.49026e+06	577058		Peak Found	Peak Found	Peak Found	High	27	34.96
FALSE	High	NQILNLTTDNANIL	L			1	2	2	IPI00000012.1	0	1556.83	0					Not Found	Not Found	Not Found	High	45	48.17
FALSE	High	NQILNLTTDNANILL	L			1	2	1	IPI00000012.1	0	1669.91	0					Not Found	Not Found	Not Found	High	34	52.87
FALSE	High	NQILNLTTDNANILLQ	Q			1	2	1	IPI00000012.1	0	1797.97	0					Not Found	Not Found	Not Found	High	39	49.99
FALSE	High	NQILNLTTDNANILLQIDNAR	R			1	2	33	IPI00000012.1	0	2367.26	0	1.71003e+07	8.9763e+06	4.16882e+06		High	High	High	High	159	52.42
FALSE	High	NQVLQTK	K			4	5	3	sp; IPI00000008.1; IPI00000001.1; sp	0	830.473	0	69925.5			Shared	Peak Found	Not Found	Not Found	High	31	12.48
FALSE	High	NRKDIENQYETQITQIEHEVSSSGQEVQSSAK	K			1	2	1	IPI00000010.1	2	3662.75	0				No Quan Values	Not Found	Not Found	Not Found	High	54
FALSE	High	NSGDVNVEINVAPGK	K			1	2	1	IPI00000010.1	0	1512.77	0					Not Found	Not Found	Not Found	High	73	29.58
FALSE	High	NSKIEISELNR	R			2	3	1	sp; IPI00000001.1	1	1302.7	0				No Quan Values	Not Found	Not Found	Not Found	High	22
FALSE	High	NSRVATVSLPR	R			1	1	1	sp	1	1199.69	0					Not Found	Not Found	Not Found	High	29	26.02
FALSE	High	NSSYFVEWIPN	N			8	11	3	E1BJB1; F2Z5K5; F1S6M7; I3LBV1; Q2HJ81; Q767L7; F2Z571; F2Z5B2	0	1355.63	0	2.5321e+06	2.38348e+06	7.6506e+06	Shared	Peak Found	Peak Found	Peak Found	High	25	50.42
FALSE	High	NSSYFVEWIPNNVK	K	1		8	11	40	E1BJB1; F2Z5K5; F1S6M7; I3LBV1; Q2HJ81; Q767L7; F2Z571; F2Z5B2	0	1696.83	0	2.85998e+08	3.90727e+08	4.19588e+08	Shared	High	High	High	High	56	46.42
FALSE	High	NSSYFVEWIPNNVKTAV	V			5	6	1	E1BJB1; F2Z5K5; Q767L7; F2Z571; F2Z5B2	1	1967.99	0		110781		Shared	Not Found	Peak Found	Not Found	High	23	49.91
FALSE	High	NTFFSETGAGK	K			5	15	1	F1RK98; P02550; A7E1S5; F1SHC1; F1MNF8	0	1158.54	0				No Quan Values	Not Found	Not Found	High	High	44
FALSE	High	NTFSVVPSPK	K			4	6	2	F2Z5K5; F1S6M7; Q767L7; F2Z571	0	1075.58	0	86488.1	70833.4	243867	Shared	High	Peak Found	Peak Found	High	35	29.91
FALSE	High	NTMAACDPR	R		1xCarbamidomethyl [C6]; 1xOxidation [M3]	1	1	2	E1BJK2	0	1051.43	0	144863	122989	271440		Peak Found	Peak Found	High	High	20	14.18
FALSE	High	NTTAIAEAWAR	R			7	15	3	F1RK98; Q2HJB8; I3LDR2; P02550; F1SHC1; F1MNF8; F2Z5S8	0	1203.61	0	68686.2	888220	1.33171e+06	Shared	High	Peak Found	High	High	63	32.36
FALSE	High	NVDLTEFQTNLVPYPR	R			7	17	8	F1RK98; Q2HJB8; I3LDR2; P02550; F1SHC1; F1MNF8; F2Z5S8	0	1905.97	0	379619	743418	3.01712e+06	Shared	High	High	High	High	106	46.9
FALSE	High	NVEIDPEIQK	K			2	3	14	sp; IPI00000001.1	0	1184.62	0	2.10119e+07	2.6219e+07	3913125	Shared	High	High	High	High	61	27.64
FALSE	High	NVEIDPEIQKVK	K			2	3	7	sp; IPI00000001.1	1	1411.78	0		2.60909e+06	683288	Shared	Not Found	High	High	High	38	28.4
FALSE	High	NVGTRPINLEPIFQGYIDSLK	K			2	2	1	IPI00000008.1; sp	0	2374.28	0	50641.5			Shared	Peak Found	Not Found	Not Found	High	27	55.27
FALSE	High	NVGTRPINLEPIFQGYIDSLKR	R			2	2	1	IPI00000008.1; sp	1	2530.38	0	68486.6			Shared	Peak Found	Not Found	Not Found	High	56	53.26
FALSE	High	NVILSMDNNR	R		1xOxidation [M6]	2	3	1	sp; IPI00000001.1	0	1191.58	0				Shared	Not Found	Not Found	Not Found	High	35	20.2
FALSE	High	NVKVDPEIQNVK	K			2	2	11	IPI00000008.1; sp	1	1382.76	0	458092	2.92117e+06	1.01736e+06	Shared	High	High	High	High	64	23.92
FALSE	High	NVKVDPEIQNVKAQER	R			2	2	3	IPI00000008.1; sp	2	1867	0		1.95168e+06	103609	Shared	Not Found	High	Peak Found	High	76	23.2
FALSE	High	NVQALEIELQSQ	Q			1	2	2	IPI00000012.1	0	1371.71	0					Not Found	Not Found	Not Found	High	50	40.34
FALSE	High	NVQALEIELQSQL	L			1	2	1	IPI00000012.1	0	1484.8	0					Not Found	Not Found	Not Found	High	37	50.6
FALSE	High	NVQALEIELQSQLALK	K			1	2	44	IPI00000012.1	0	1797.01	0	7.54085e+06	5.65435e+06	2.9859e+06		High	High	High	High	99	50.97
FALSE	High	NVQALEIELQSQLALKQSLEASLAETEGR	R			1	2	1	IPI00000012.1	1	3168.67	0				No Quan Values	High	Not Found	Not Found	High	98
FALSE	High	NVQDAIADAEQR	R			2	2	21	IPI00000008.1; sp	0	1329.64	0	3.1557e+07	2.92667e+07	1.04547e+07	Shared	High	High	High	High	77	28.93
FALSE	High	NVQDAIADAEQRGEHALK	K			2	2	8	IPI00000008.1; sp	1	1964.98	0	1.67609e+06	1.2205e+06	311625	Shared	High	High	High	High	63	37.87
FALSE	High	NVQDAIADAEQRGEHALKDAR	R			2	2	7	IPI00000008.1; sp	2	2307.14	0	822538			Shared	High	High	Not Found	High	51	40.39
FALSE	High	NVSTGDVNVE	E			1	2	1	IPI00000012.1	0	1033.48	0					Not Found	Not Found	Not Found	High	21	22.31
FALSE	High	NVSTGDVNVEMN	N		1xOxidation [M11]	1	2	3	IPI00000012.1	0	1294.56	0	266628	116661			Peak Found	Peak Found	Not Found	High	25	21.41
FALSE	High	NVSTGDVNVEMNAAPGVDLTQLLNNMR	R		2xOxidation [M11; M26]	1	2	52	IPI00000012.1	0	2904.38	0	1.61922e+07	1.20064e+07	2.0623e+06		High	High	High	High	89	46.51
FALSE	High	NVSTGDVNVEMNAAPGVDLTQLLNNMR	R		1xOxidation [M]	1	2	26	IPI00000012.1	0	2888.39	0	3.7371e+06	3.41333e+06	1.92905e+06		High	High	High	High	133	53.59
FALSE	High	NVSTGDVNVEMNAAPGVDLTQLLNNMR	R			1	2	3	IPI00000012.1	0	2872.39	0			200140		Not Found	High	Peak Found	High	104	56.23
FALSE	High	NYQPPTVXLSNTTAIAEAWAR	R			1	1	2	I3LDR2	0	2300.17	0	5.26212e+06	4768810	3.54964e+06		Peak Found	Peak Found	High	High	50	41.38
FALSE	High	NYSPYYNTIDDLK	K			1	2	6	IPI00000010.1	0	1605.74	0	2.15936e+06	3.30097e+06			High	High	High	High	65	37.5
FALSE	High	NYSPYYNTIDDLKDQIVDLTVGNNK	K			1	2	20	IPI00000010.1	1	2902.41	0	1.66168e+07	2.94516e+07	6.80379e+06		High	High	High	High	122	56.55
FALSE	High	PDNFIFGQSGAGNNWAK	K			1	2	9	F1S6M7	0	1822.85	0	2.90898e+06	1.77921e+06	1.01555e+07		High	High	High	High	92	41.53
FALSE	High	PDNFVFGQSGAGNNWAK	K			5	9	6	E1BJB1; F2Z5K5; Q767L7; F2Z571; F2Z5B2	0	1808.84	0	1015620	702982	2.26747e+06	Shared	High	High	High	High	81	38.62
FALSE	High	PEIQNVK	K			2	2	1	IPI00000008.1; sp	0	827.462	0				Shared	Not Found	Not Found	Not Found	High	18	14.84
FALSE	High	PGFAPLTSR	R			5	9	1	E1BJB1; F2Z5K5; Q767L7; F2Z571; F2Z5B2	0	945.515	0	90851.9	108335	292134	Shared	Peak Found	Peak Found	High	High	30	29.44
FALSE	High	PGGDLAK	K			6	14	3	F1RK98; Q2HJB8; P02550; F1SHC1; F1MNF8; F2Z5S8	0	657.357	0				Shared	Not Found	Not Found	Not Found	High	43	38.28
FALSE	High	PGTMDSVR	R		1xOxidation [M4]	8	13	3	E1BJB1; F2Z5K5; F1S6M7; I3LBV1; Q2HJ81; Q767L7; F2Z571; F2Z5B2	0	878.404	0				No Quan Values	High	High	Not Found	High	52
FALSE	High	PINLEPIFQGYIDSLK	K			2	2	13	IPI00000008.1; sp	0	1846.99	0		902684		Shared	High	High	High	High	72	58.44
FALSE	High	PINLEPIFQGYIDSLKR	R			2	2	8	IPI00000008.1; sp	1	2003.1	0	739536	488593	290881	Shared	High	High	Peak Found	High	66	56.52
FALSE	High	PLNVEIDPEIQK	K			2	3	2	sp; IPI00000001.1	0	1394.75	0				Shared	High	Not Found	Not Found	High	65	36.07
FALSE	High	PPTVXLSNTTAIAEAWAR	R			1	1	1	I3LDR2	0	1912.98	0				No Quan Values	Not Found	Not Found	High	High	48
FALSE	High	PPTVXLSNTTAIAEAWAR	R			1	1	1	I3LDR2	0	1911.99	0				No Quan Values	Not Found	Not Found	High	High	31
FALSE	High	PPTVXLSNTTAIAEAWAR	R			1	1	2	I3LDR2	0	1854.97	0				No Quan Values	Not Found	Not Found	High	High	28
FALSE	High	PSGNYVGDSDLQLER	R			1	2	12	F1S6M7	0	1649.78	0	9.04234e+06	3.64376e+06	1.62887e+06		High	High	High	High	124	31.03
FALSE	High	PSSPPK	K			1	1	1	sp	0	612.335	0	70585.9	429662	643188		Peak Found	Peak Found	High	High	15	11.08
FALSE	High	PTGSYHGDSDLQLER	R			2	6	14	E1BJB1; F2Z5B2	0	1674.77	0	8.39891e+06	4.29126e+06	4.07226e+06	Shared	High	High	High	High	87	23.85
FALSE	High	PTGTYHGDSDLQLER	R			2	2	7	F2Z5K5; F2Z571	0	1688.79	0	3.39685e+06	1.99498e+06	1.61226e+06	Shared	High	High	High	High	93	24.16
FALSE	High	PTVIDEVR	R			4	12	6	P02550; A7E1S5; F1SHC1; F1MNF8	0	928.51	0			584197	Shared	High	Not Found	High	High	55	48.09
FALSE	High	PTVVDEVRAGTYR	R			2	3	1	Q2HJB8; I3LDR2	1	1462.76	0				No Quan Values	Not Found	Not Found	Not Found	High	19
FALSE	High	PTVXLSNTTAIAEAWAR	R			1	1	5	I3LDR2	0	1787.93	0	153244	1886070	2.52038e+06		High	High	Peak Found	High	65	43.93
FALSE	High	PTVXLSNTTAIAEAWAR	R			1	1	3	I3LDR2	0	1886.98	0	454228	553953			Peak Found	Peak Found	High	High	53	54.66
FALSE	High	PTYTNLNR	R			6	17	8	F1RK98; Q2HJB8; I3LDR2; P02550; F1SHC1; F2Z5S8	0	978.5	0	1.31638e+07	3.77955e+07	1.05762e+08	Shared	High	High	High	High	53	18.19
FALSE	High	PVISAEK	K			5	14	1	F1RK98; P02550; F1SHC1; F1MNF8; F2Z5S8	0	743.43	0				No Quan Values	Not Found	Not Found	High	High	44
FALSE	High	PWIQPK	K			1	1	2	sp	0	768.44	0		314097			Not Found	High	Not Found	High	23	23.35
FALSE	High	QAGQCGNQIGAK	K		1xCarbamidomethyl [C5]; 1xGln->pyro-Glu [N-Term]	6	11	1	E1BJB1; F2Z5K5; F1S6M7; Q767L7; F2Z571; F2Z5B2	0	1214.56	0		100861		Shared	Not Found	High	Not Found	High	28	15.63
FALSE	High	QCANLQAAIADAEQR	R		1xCarbamidomethyl [C2]	1	1	1	IPI00000005.1	0	1658.79	0				No Quan Values	Not Found	Not Found	Not Found	High	59
FALSE	High	QCQTLQVSVADAEQR	R		1xCarbamidomethyl [C2]	1	1	1	IPI00000004.1	0	1732.83	0	307900				High	Not Found	Not Found	High	90	29.61
FALSE	High	QEELMALK	K		1xOxidation [M5]	1	2	1	IPI00000010.1	0	977.497	0					Not Found	Not Found	Not Found	High	21	22.64
FALSE	High	QEELMALK	K			1	2	1	IPI00000010.1	0	961.502	0			117881		Not Found	Not Found	Peak Found	High	24	29.56
FALSE	High	QEIAEINR	R		1xGln->pyro-Glu [N-Term]	1	1	4	IPI00000005.1	0	955.484	0	305367	1.06488e+06			Peak Found	High	Not Found	High	42	27.6
FALSE	High	QEIAEINR	R			1	1	8	IPI00000005.1	0	972.511	0	2.60255e+06	5.54232e+06			High	High	High	High	46	19.48
FALSE	High	QEIECQNQEYSLLL	L		1xCarbamidomethyl [C5]; 1xGln->pyro-Glu [N-Term]	1	2	1	IPI00000010.1	0	1749.8	0					Not Found	Not Found	Not Found	High	19	51.98
FALSE	High	QEIECQNQEYSLLL	L		1xCarbamidomethyl [C5]	1	2	1	IPI00000010.1	0	1766.83	0					Not Found	Not Found	Not Found	High	39	46.56
FALSE	High	QEIECQNQEYSLLLSIK	K		1xCarbamidomethyl [C5]; 1xGln->pyro-Glu [N-Term]	1	2	1	IPI00000010.1	0	2078.01	0					Not Found	Not Found	Not Found	High	52	50.72
FALSE	High	QEIECQNQEYSLLLSIK	K		1xCarbamidomethyl [C5]	1	2	11	IPI00000010.1	0	2095.04	0	1.80191e+06	2.77768e+06	958555		High	High	High	High	109	46.18
FALSE	High	QEPVLGPVR	R			1	1	2	sp	0	994.568	0		1706018			Not Found	High	Not Found	High	27	25.35
FALSE	High	QEPVLGPVRGPFPIIV	V			1	1	1	sp	1	1718	0		168101			Not Found	High	Not Found	High	15	53.74
FALSE	High	QEQNQEQPIR	R		1xGln->pyro-Glu [N-Term]	1	1	2	sp	0	1252.59	0	826576	4.10401e+06	153629		Peak Found	High	Peak Found	High	42	17.43
FALSE	High	QEYEQLIAK	K		1xGln->pyro-Glu [N-Term]	1	2	12	IPI00000010.1	0	1104.56	0	10636561	21390543	3.25635e+06		High	High	High	High	56	35.98
FALSE	High	QEYEQLIAK	K			1	2	14	IPI00000010.1	0	1121.58	0	4.73583e+07	68512428	16955264		High	High	High	High	52	27.44
FALSE	High	QFASFIDK	K			2	3	1	sp; IPI00000001.1	0	955.488	0		128957		Shared	Not Found	Peak Found	Not Found	High	25	33.17
FALSE	High	QFSSSYLSR	R		1xGln->pyro-Glu [N-Term]	1	2	7	IPI00000010.1	0	1057.49	0	1.09261e+06	2.8551e+06			High	High	High	High	70	35.72
FALSE	High	QFSSSYLSR	R			1	2	9	IPI00000010.1	0	1074.52	0	4.42735e+06	1.15211e+07	1.71284e+06		High	High	High	High	48	26.32
FALSE	High	QFTSSSSMK	K		1xOxidation [M8]	2	2	1	IPI00000011.1; IPI00000013.1	0	1018.45	0		426776	73794.4	Shared	Not Found	High	Peak Found	High	47	9.2
FALSE	High	QFTSSSSMK	K		1xGln->pyro-Glu [N-Term]; 1xOxidation [M8]	2	2	1	IPI00000011.1; IPI00000013.1	0	1001.42	0	65615.3	217546		Shared	Peak Found	Peak Found	Not Found	High	25	17.49
FALSE	High	QFTSSSSMK	K		1xGln->pyro-Glu [N-Term]	2	2	1	IPI00000011.1; IPI00000013.1	0	985.43	0		195033		Shared	Not Found	High	Not Found	High	23	24.69
FALSE	High	QFTSSSSMK	K			2	2	7	IPI00000011.1; IPI00000013.1	0	1002.46	0	408488	1.4598e+06	273768	Shared	High	High	High	High	55	14.98
FALSE	High	QGFLVFHSFGGGTGSGFTSLLMER	R		1xOxidation [M22]	4	11	1	A7E1S5; F1SHC1; F1MNF8; F2Z5S8	0	2548.23	0				No Quan Values	Not Found	Not Found	Not Found	High	20
FALSE	High	QGVDADINGLR	R		1xGln->pyro-Glu [N-Term]	1	2	14	IPI00000010.1	0	1140.56	0	9.81568e+06	1.29699e+07	1.86392e+06		High	High	High	High	62	33.87
FALSE	High	QGVDADINGLR	R			1	2	13	IPI00000010.1	0	1157.59	0	3.59056e+07	4.47101e+07	9053272		High	High	High	High	72	28.49
FALSE	High	QGVEADINGLR	R			1	1	1	IPI00000014.1	0	1171.61	0					Not Found	Not Found	Not Found	High	42	31.38
FALSE	High	QIEHEVSSSGQEVQSSAK	K		1xGln->pyro-Glu [N-Term]	1	2	1	IPI00000010.1	0	1912.89	0				No Quan Values	Not Found	Not Found	Not Found	High	75
FALSE	High	QIEHEVSSSGQEVQSSAK	K			1	2	3	IPI00000010.1	0	1929.91	0					Not Found	High	Not Found	High	85	18.54
FALSE	High	QIESLTEELAYLK	K		1xGln->pyro-Glu [N-Term]	1	2	1	IPI00000012.1	0	1519.79	0				No Quan Values	Not Found	Not Found	Not Found	High	51
FALSE	High	QIESLTEELAYLK	K			1	2	3	IPI00000012.1	0	1536.82	0	142594				High	Not Found	Not Found	High	74	47.48
FALSE	High	QIHQSVTDTNVILSMDNSR	R		1xOxidation [M15]	2	2	1	IPI00000008.1; sp	0	2174.05	0				Shared	Not Found	Not Found	Not Found	High	50	29.22
FALSE	High	QIHQSVTDTNVILSMDNSR	R		1xGln->pyro-Glu [N-Term]; 1xOxidation [M15]	2	2	1	IPI00000008.1; sp	0	2157.02	0				Shared	Not Found	Not Found	Not Found	High	62	34.7
FALSE	High	QILNLTTDNANILLQIDNAR	R			1	2	1	IPI00000012.1	0	2253.22	0					Not Found	Not Found	Not Found	High	65	51.42
FALSE	High	QIQAQISALEEQLQQIR	R			1	2	2	IPI00000012.1	0	1996.08	0					Not Found	Not Found	Not Found	High	88	51.77
FALSE	High	QISNLQ	Q			2	3	1	sp; IPI00000001.1	0	702.378	0				Shared	Not Found	Not Found	Not Found	High	19	16.89
FALSE	High	QISNLQQ	Q			2	3	4	sp; IPI00000001.1	0	830.437	0	1.30507e+06	1.27351e+06	129834	Shared	High	High	Peak Found	High	24	17.06
FALSE	High	QISNLQQSISDAEQR	R		1xGln->pyro-Glu [N-Term]	2	3	8	sp; IPI00000001.1	0	1699.82	0	6126112	9475024	2.60335e+06	Shared	High	High	High	High	77	41.34
FALSE	High	QISNLQQSISDAEQR	R			2	3	19	sp; IPI00000001.1	0	1716.85	0	4.00775e+07	60937048	2.5327e+07	Shared	High	High	High	High	96	33.09
FALSE	High	QISNLQQSISDAEQRGENALK	K			2	3	3	sp; IPI00000001.1	1	2329.17	0	870373	982717		Shared	Peak Found	Peak Found	Not Found	High	41	42.4
FALSE	High	QISNLQQSISDAEQRGENALKDAK	K		1xGln->pyro-Glu [N-Term]	2	3	1	sp; IPI00000001.1	2	2626.31	0				Shared	Not Found	Not Found	Not Found	High	27	49.56
FALSE	High	QISNLQQSISDAEQRGENALKDAK	K			2	3	2	sp; IPI00000001.1	2	2643.33	0				Shared	Not Found	Not Found	Not Found	High	29	44.27
FALSE	High	QISSYK	K		1xGln->pyro-Glu [N-Term]	1	2	5	IPI00000012.1	0	708.356	0	417236	612084			High	High	Not Found	High	24	20.06
FALSE	High	QITAGR	R			2	3	3	sp; IPI00000001.1	0	645.368	0				Shared	Not Found	Not Found	Not Found	High	23	8.29
FALSE	High	QLDSIVGER	R		1xGln->pyro-Glu [N-Term]	1	1	12	IPI00000005.1	0	999.511	0	1.95795e+06	3.27916e+06	486444		High	High	Peak Found	High	50	36.68
FALSE	High	QLDSIVGER	R			1	1	13	IPI00000005.1	0	1016.54	0	9.97935e+06	12641891	3.48647e+06		High	High	High	High	45	25.9
FALSE	High	QLDTLGNDK	K		1xGln->pyro-Glu [N-Term]	1	1	2	IPI00000004.1	0	986.479	0	162931				High	Not Found	Not Found	High	42	28.59
FALSE	High	QLFHPEQL	L		1xGln->pyro-Glu [N-Term]	7	19	4	F1RK98; I3LDR2; P02550; A7E1S5; F1SHC1; F1MNF8; F2Z5S8	0	994.499	0			1.96126e+06	Shared	Not Found	Not Found	High	High	23	44.76
FALSE	High	QLFHPEQL	L			7	19	1	F1RK98; I3LDR2; P02550; A7E1S5; F1SHC1; F1MNF8; F2Z5S8	0	1011.53	0				No Quan Values	Not Found	Not Found	Not Found	High	22
FALSE	High	QLFHPEQLISGK	K			1	2	4	F1MNF8	0	1396.76	0	206069	433856	868821		Peak Found	High	High	High	36	36.65
FALSE	High	QLFHPEQLIT	T		1xGln->pyro-Glu [N-Term]	6	17	1	F1RK98; I3LDR2; P02550; A7E1S5; F1SHC1; F2Z5S8	0	1208.63	0				No Quan Values	Not Found	Not Found	High	High	28
FALSE	High	QLFHPEQLITGK	K		1xGln->pyro-Glu [N-Term]	6	17	87	F1RK98; I3LDR2; P02550; A7E1S5; F1SHC1; F2Z5S8	0	1393.75	0	1.32167e+08	3.03185e+08	4.50149e+08	Shared	High	High	High	High	50	44.92
FALSE	High	QLFHPEQLITGK	K			6	17	157	F1RK98; I3LDR2; P02550; A7E1S5; F1SHC1; F2Z5S8	0	1410.77	0	5.16625e+08	8.45877e+08	9.51207e+08	Shared	High	High	High	High	61	37.21
FALSE	High	QLFHPEQLITGKEDAANNYAR	R		1xGln->pyro-Glu [N-Term]	6	17	14	F1RK98; I3LDR2; P02550; A7E1S5; F1SHC1; F2Z5S8	1	2398.18	0	1.36511e+07	79102522	1.23807e+07	Shared	High	High	High	High	111	42.41
FALSE	High	QLFHPEQLITGKEDAANNYAR	R			6	17	35	F1RK98; I3LDR2; P02550; A7E1S5; F1SHC1; F2Z5S8	1	2415.21	0	4.53552e+07	2.13206e+08	4.04516e+07	Shared	High	High	High	High	98	36.45
FALSE	High	QLITGK	K			7	18	1	F1RK98; Q2HJB8; I3LDR2; P02550; A7E1S5; F1SHC1; F2Z5S8	0	659.409	0			82863.5	Shared	Not Found	Not Found	Peak Found	High	23	14.09
FALSE	High	QLNADLR	R			10	16	2	A5GFX6; E1BJB1; F2Z5K5; F1S6M7; I3LBV1; Q2HJ81; E1BJK2; Q767L7; F2Z571; F2Z5B2	0	829.453	0				Shared	Not Found	Not Found	High	High	25	19.32
FALSE	High	QLTHSLGGGTGSGMGTLLISK	K		1xOxidation [M14]	8	15	15	E1BJB1; F2Z5K5; F1S6M7; I3LBV1; Q2HJ81; Q767L7; F2Z571; F2Z5B2	0	2031.05	0	6.77157e+06	3.98013e+06	7.82924e+06	Shared	High	High	High	High	58	31.16
FALSE	High	QLTHSLGGGTGSGMGTLLISK	K		1xGln->pyro-Glu [N-Term]; 1xOxidation [M14]	8	15	8	E1BJB1; F2Z5K5; F1S6M7; I3LBV1; Q2HJ81; Q767L7; F2Z571; F2Z5B2	0	2014.03	0	1.2813e+06		222507	Shared	High	High	High	High	119	38.44
FALSE	High	QLTHSLGGGTGSGMGTLLISK	K		1xGln->pyro-Glu [N-Term]	8	15	3	E1BJB1; F2Z5K5; F1S6M7; I3LBV1; Q2HJ81; Q767L7; F2Z571; F2Z5B2	0	1998.03	0			1.50584e+06	Shared	Not Found	Not Found	High	High	118	43.37
FALSE	High	QLTHSLGGGTGSGMGTLLISK	K			8	15	9	E1BJB1; F2Z5K5; F1S6M7; I3LBV1; Q2HJ81; Q767L7; F2Z571; F2Z5B2	0	2015.06	0	942253	1.78997e+06	1.96482e+07	Shared	High	High	High	High	88	37
FALSE	High	QLVENTDETYCIDNEALYDICFR	R		2xCarbamidomethyl [C11; C21]	7	12	5	F2Z5K5; F1S6M7; I3LBV1; Q2HJ81; Q767L7; F2Z571; F2Z5B2	0	2881.27	0	321833	388293	2465278	Shared	High	Peak Found	High	High	92	49.07
FALSE	High	QLVENTDETYSIDNEALYDICFR	R		1xCarbamidomethyl [C21]	1	2	7	E1BJB1	0	2808.27	0	349261	387691	3.25228e+06		High	High	High	High	102	49
FALSE	High	QMFDAK	K			5	8	1	F2Z5K5; F1S6M7; I3LBV1; Q2HJ81; F2Z571	0	739.344	0			204708	Shared	Not Found	Not Found	High	High	28	18
FALSE	High	QMFDSK	K			2	2	1	E1BJB1; F2Z5B2	0	755.339	0			203878	Shared	Not Found	Not Found	High	High	21	15.98
FALSE	High	QNLEPLFEQYIN	N			1	1	1	IPI00000005.1	0	1507.74	0					Not Found	Not Found	Not Found	High	23	50.17
FALSE	High	QNLEPLFEQYINNLR	R		1xGln->pyro-Glu [N-Term]	1	1	3	IPI00000005.1	0	1873.94	1	1.89112e+06	2.6313e+06	1.12956e+06		High	Peak Found	Peak Found	High	68	58.75
FALSE	High	QNLEPLFEQYINNLR	R			1	1	20	IPI00000005.1	0	1890.97	0	2.91646e+06	5.47044e+06	1.30713e+06		High	High	High	High	84	54.97
FALSE	High	QNLEPLFEQYINNLRR	R			1	1	4	IPI00000005.1	1	2047.07	0	538567	863648			Peak Found	High	Not Found	High	27	51.88
FALSE	High	QPDGQMPSDKTIGGGDDSFNTFFSETGAGK	K		1xGln->pyro-Glu [N-Term]	5	14	1	F1RK98; P02550; A7E1S5; F1SHC1; F1MNF8	1	3074.33	0				Shared	Not Found	Not Found	Not Found	High	65	49.98
FALSE	High	QPPTVVPGGDLAK	K			5	13	5	F1RK98; Q2HJB8; F1SHC1; F1MNF8; F2Z5S8	0	1278.71	0	760305	2.88088e+06	2.32849e+06	Shared	High	High	High	High	32	27.92
FALSE	High	QQSISDAEQR	R		1xGln->pyro-Glu [N-Term]	2	3	1	sp; IPI00000001.1	0	1144.52	0				Shared	Not Found	Not Found	Not Found	High	48	17.92
FALSE	High	QQSISDAEQR	R			2	3	4	sp; IPI00000001.1	0	1161.55	0	58391	73603.2		Shared	High	High	Not Found	High	50	13.43
FALSE	High	QQVDTSTR	R		1xGln->pyro-Glu [N-Term]	2	3	1	sp; IPI00000001.1	0	917.432	0	18357.5	24412.7		Shared	Peak Found	Peak Found	Not Found	High	39	13.41
FALSE	High	QRPAEIK	K		1xGln->pyro-Glu [N-Term]	1	1	6	IPI00000011.1	0	824.462	0	717552	1.65799e+06	381804		High	High	High	High	28	15
FALSE	High	QRPSEIK	K		1xGln->pyro-Glu [N-Term]	1	1	3	IPI00000013.1	0	840.457	0	168078	1.24309e+06			Peak Found	High	Not Found	High	24	14.55
FALSE	High	QRPSEIK	K			1	1	1	IPI00000013.1	0	857.484	0		639748			Not Found	High	Not Found	High	21	8.99
FALSE	High	QRPSEIKDYSPYFK	K			1	1	7	IPI00000013.1	1	1757.89	0		713502			Not Found	High	Not Found	High	53	29.67
FALSE	High	QSGAGNNWAK	K			6	11	2	E1BJB1; F2Z5K5; F1S6M7; Q767L7; F2Z571; F2Z5B2	0	1032.49	0			36724.5	Shared	Not Found	Not Found	Peak Found	High	50	13.7
FALSE	High	QSGAGNNWAKGHYTEGAELVDSVLDVVR	R			5	10	3	E1BJB1; F1S6M7; Q767L7; F2Z571; F2Z5B2	1	2972.45	0		267417	368630	Shared	High	High	High	High	37	52.11
FALSE	High	QSISDAEQR	R			2	3	1	sp; IPI00000001.1	0	1033.49	0				Shared	Not Found	Not Found	Not Found	High	33	12.58
FALSE	High	QSLEASLAETEGR	R		1xGln->pyro-Glu [N-Term]	1	2	12	IPI00000012.1	0	1373.65	0	6695335	4.88292e+06	2.13347e+06		High	High	High	High	85	37.44
FALSE	High	QSLEASLAETEGR	R			1	2	39	IPI00000012.1	0	1390.68	0	5.07003e+07	1.34704e+06	383448		High	High	High	High	102	30.97
FALSE	High	QSLLQPLNVEIDPEIQK	K		1xGln->pyro-Glu [N-Term]	2	3	6	sp; IPI00000001.1	0	1947.04	0	437691	587026		Shared	High	High	Not Found	High	47	52.45
FALSE	High	QSLLQPLNVEIDPEIQK	K			2	3	10	sp; IPI00000001.1	0	1964.07	0	4.14384e+06	2880269		Shared	High	High	High	High	60	47.25
FALSE	High	QSLLQPLNVEIDPEIQKVK	K			2	3	3	sp; IPI00000001.1	1	2191.23	0		783529	318050	Shared	Not Found	High	High	High	37	45.79
FALSE	High	QSLLQPLNVEIDPEIQKVKSR	R			2	3	1	sp; IPI00000001.1	2	2434.37	0				No Quan Values	Not Found	High	Not Found	High	29
FALSE	High	QSLLQPLNVK	K			2	2	2	IPI00000008.1; sp	0	1139.68	0	613316	436928		Shared	Peak Found	High	Not Found	High	32	36.9
FALSE	High	QSLLTPLHVEIDPEIQK	K			1	1	1	IPI00000004.1	0	1960.07	0				No Quan Values	High	Not Found	Not Found	High	32
FALSE	High	QSLLTPLNLQIDPTIQR	R			1	1	2	IPI00000005.1	0	1950.1	0					Not Found	Not Found	Not Found	High	43	49.55
FALSE	High	QSVEADINGLR	R		1xGln->pyro-Glu [N-Term]	2	3	12	IPI00000012.1; sp	0	1184.59	0	8.09462e+06	7.31807e+06	2.23381e+06	Shared	High	High	High	High	54	37.63
FALSE	High	QSVEADINGLR	R			2	3	15	IPI00000012.1; sp	0	1201.62	0	3.93497e+07	2.56298e+07	8.522e+06	Shared	High	High	High	High	62	31.18
FALSE	High	QSVEADINGLRR	R		1xGln->pyro-Glu [N-Term]	2	3	2	IPI00000012.1; sp	1	1340.69	0	10085337	6.12429e+06	2.15198e+06	Shared	Peak Found	High	Peak Found	High	24	34.7
FALSE	High	QSVEADINGLRR	R			2	3	13	IPI00000012.1; sp	1	1357.72	0	32913487	1.93933e+07	5.09187e+06	Shared	High	High	High	High	38	28.92
FALSE	High	QSVTDTNVILSMDNSR	R		1xOxidation [M12]	2	2	1	IPI00000008.1; sp	0	1795.85	0				No Quan Values	Not Found	Not Found	Not Found	High	72
FALSE	High	QTALVELVK	K			1	1	4	sp	0	1000.6	0	424856	478074			High	High	Not Found	High	47	34.59
FALSE	High	QTNLVPYPR	R			9	19	7	F1RK98; G5E6J5; Q2HJB8; I3LDR2; P02550; F1SHC1; F1MNF8; F1RYV9; F2Z5S8	0	1087.59	0	515169	1.02416e+06	4.22906e+06	Shared	High	High	High	High	50	28.95
FALSE	High	QTQISETNVILSMDNNR	R		1xOxidation [M13]	2	3	1	sp; IPI00000001.1	0	1978.95	0	75754.8			Shared	Peak Found	Not Found	Not Found	High	62	31.97
FALSE	High	QTQISETNVILSMDNNR	R		1xGln->pyro-Glu [N-Term]; 1xOxidation [M13]	2	3	1	sp; IPI00000001.1	0	1961.92	0				Shared	Not Found	Not Found	Not Found	High	52	37.04
FALSE	High	QTRPILK	K		1xGln->pyro-Glu [N-Term]	1	1	2	IPI00000013.1	0	838.515	0				No Quan Values	Not Found	High	Not Found	High	17
FALSE	High	QTVEADVNGLR	R		1xGln->pyro-Glu [N-Term]	1	1	2	IPI00000013.1	0	1184.59	0	878971	1.18737e+06			Peak Found	High	Not Found	High	45	33.45
FALSE	High	QTVEADVNGLR	R			1	1	3	IPI00000013.1	0	1201.62	0		1374680			Not Found	High	Not Found	High	76	26.79
FALSE	High	QTVEADVNGLRR	R		1xGln->pyro-Glu [N-Term]	1	1	1	IPI00000013.1	1	1340.69	0	87123.2	279543			Peak Found	Peak Found	Not Found	High	22	30.47
FALSE	High	QTVEADVNGLRR	R			1	1	3	IPI00000013.1	1	1357.72	0	207195	580204			Peak Found	High	Not Found	High	39	24.24
FALSE	High	QVLDNL	L			1	2	1	IPI00000010.1	0	701.383	0					Not Found	Not Found	Not Found	High	22	32.04
FALSE	High	QVLDNLTMEK	K		1xOxidation [M8]	1	2	42	IPI00000010.1	0	1206.6	0	3.0119e+07	4.11029e+07	1.08532e+07		High	High	High	High	56	27.39
FALSE	High	QVLDNLTMEK	K		1xGln->pyro-Glu [N-Term]; 1xOxidation [M8]	1	2	16	IPI00000010.1	0	1189.58	0	9.9618e+06	1.20632e+07	1.84303e+06		High	High	High	High	48	36.36
FALSE	High	QVLDNLTMEK	K		1xGln->pyro-Glu [N-Term]	1	2	1	IPI00000010.1	0	1173.58	0					Not Found	Not Found	Not Found	High	45	40.32
FALSE	High	QVLDNLTMEK	K			1	2	7	IPI00000010.1	0	1190.61	0	1.56492e+06	5506019	1.8589e+06		High	High	High	High	49	31.37
FALSE	High	QVLDNLTMEKSDLEMQYETLQEELMALKK	K		3xOxidation [M8; M15; M25]	1	2	1	IPI00000010.1	2	3518.7	0	50722	78242.6			Peak Found	Peak Found	Not Found	High	50	54.85
FALSE	High	QVLQTK	K		1xGln->pyro-Glu [N-Term]	4	5	1	sp; IPI00000008.1; IPI00000001.1; sp	0	699.404	0				Shared	Not Found	Not Found	Not Found	High	19	19.28
FALSE	High	QYEDIAQK	K			2	2	1	sp; IPI00000001.1	0	994.484	0				Shared	Not Found	Not Found	Not Found	High	22	16.21
FALSE	High	RAFVHWYVGEGMEEGEFSEAR	R		1xOxidation [M12]	7	16	2	F1RK98; Q2HJB8; I3LDR2; P02550; F1SHC1; F1MNF8; F2Z5S8	1	2502.11	0	305671	2.45583e+06		Shared	High	Peak Found	Not Found	High	70	36.92
FALSE	High	REIVHIQAGQCGNQIGAK	K		1xCarbamidomethyl [C11]	6	11	12	E1BJB1; F2Z5K5; F1S6M7; Q767L7; F2Z571; F2Z5B2	1	1979.02	0	426665	632906	1.07252e+06	Shared	High	High	High	High	51	23.44
FALSE	High	RGDVVPK	K			8	18	1	F1RK98; G5E6J5; Q2HJB8; I3LDR2; P02550; F1SHC1; F1MNF8; F2Z5S8	1	770.452	0		590096	676818	Shared	Not Found	Peak Found	High	High	22	9.99
FALSE	High	RGHYTIGK	K			6	17	5	F1RK98; P02550; A7E1S5; F1SHC1; F1MNF8; F2Z5S8	1	931.511	0	128460	1.11144e+06	2.24143e+06	Shared	Peak Found	Peak Found	High	High	37	11.73
FALSE	High	RIHFPLATYAPVISAEK	K			4	13	6	F1RK98; F1SHC1; F1MNF8; F2Z5S8	1	1913.06	0	247576	1.8594e+06	873310	Shared	Peak Found	High	High	High	47	42.24
FALSE	High	RINVYYNEAAGNK	K			1	3	3	E1BJB1	1	1511.76	0	5.33399e+06	2.44121e+06			High	High	Not Found	High	69	23.15
FALSE	High	RINVYYNEATGGK	K			1	1	4	F2Z571	1	1484.75	0	2.14683e+06	965947			High	High	Not Found	High	75	24.19
FALSE	High	RINVYYNEATGGNYVPR	R			1	1	1	F2Z5K5	1	1985.98	0	450556				High	Not Found	Not Found	High	70	32.22
FALSE	High	RINVYYNEATGNK	K			1	3	2	F2Z5B2	1	1541.77	0	612811	273612			High	High	Not Found	High	78	23.81
FALSE	High	RISEQFTAM	M		1xOxidation [M9]	6	8	5	E1BJB1; F2Z5K5; F1S6M7; Q767L7; F2Z571; F2Z5B2	1	1098.52	0	411722	378453	629380	Shared	High	High	High	High	31	22.52
FALSE	High	RISEQFTAM	M			6	8	3	E1BJB1; F2Z5K5; F1S6M7; Q767L7; F2Z571; F2Z5B2	1	1082.53	0	200925		2.05661e+06	Shared	High	Not Found	High	High	47	30.8
FALSE	High	RISEQFTAMFR	R		1xOxidation [M9]	6	8	29	E1BJB1; F2Z5K5; F1S6M7; Q767L7; F2Z571; F2Z5B2	1	1401.69	0	1.23719e+07	1.85912e+07	3.65254e+06	Shared	High	High	High	High	48	30.97
FALSE	High	RISEQFTAMFR	R			6	8	6	E1BJB1; F2Z5K5; F1S6M7; Q767L7; F2Z571; F2Z5B2	1	1385.7	0		2.25932e+06	4.13743e+06	Shared	Not Found	High	High	High	57	38.23
FALSE	High	RLDSELK	K			3	4	1	IPI00000006.1; sp; IPI00000001.1	1	860.484	0	28605.7	128577		Shared	Peak Found	Peak Found	Not Found	High	24	15.3
FALSE	High	RLSVDYGK	K			6	17	4	F1RK98; P02550; A7E1S5; F1SHC1; F1MNF8; F2Z5S8	1	937.51	0		215076	291685	Shared	Not Found	High	High	High	31	18.05
FALSE	High	RNLDIER	R			7	18	7	F1RK98; Q2HJB8; I3LDR2; P02550; F1SHC1; F1MNF8; F2Z5S8	1	915.501	0	786444	3.69499e+06	5.95448e+06	Shared	High	High	High	High	42	16.46
FALSE	High	RNLDIERPTYTNLNR	R			6	17	29	F1RK98; Q2HJB8; I3LDR2; P02550; F1SHC1; F2Z5S8	1	1874.98	0	2.42499e+07	78091452	9.52255e+07	Shared	High	High	High	High	64	27.88
FALSE	High	RNVQALEIELQSQLALK	K			1	2	1	IPI00000012.1	1	1953.11	0					Not Found	Not Found	Not Found	High	58	45.28
FALSE	High	RPDNFIFGQSGAGNNWAK	K			1	2	1	F1S6M7	0	1978.95	0					Not Found	Not Found	Not Found	High	90	37.88
FALSE	High	RPDNFIFGQSGAGNNWAKGHYTEGAELVDSVLDVVR	R			1	2	1	F1S6M7	1	3918.92	0				Not Reliable	High	Not Found	Not Found	High	49
FALSE	High	RPDNFVFGQSGAGNNWAK	K			5	9	5	E1BJB1; F2Z5K5; Q767L7; F2Z571; F2Z5B2	0	1964.94	0	178417	191991	800672	Shared	Peak Found	High	High	High	126	35.4
FALSE	High	RPTYTNLNR	R			6	17	1	F1RK98; Q2HJB8; I3LDR2; P02550; F1SHC1; F2Z5S8	0	1134.6	0				No Quan Values	Not Found	Not Found	High	High	60
FALSE	High	RQLDSIVGER	R			1	1	7	IPI00000005.1	1	1172.64	0	710581	941347			High	High	Not Found	High	65	23.46
FALSE	High	RQLFHPEQLITGK	K			6	17	1	F1RK98; I3LDR2; P02550; A7E1S5; F1SHC1; F2Z5S8	1	1566.88	0		107132	452020	Shared	Not Found	Peak Found	High	High	32	33.86
FALSE	High	RQSVEADINGLR	R			2	3	5	IPI00000012.1; sp	1	1357.72	0	4.46981e+06	1.96441e+06	1059110	Shared	High	High	Peak Found	High	55	27.51
FALSE	High	RSGGGGGGGLGSGGSIR	R			1	2	3	IPI00000010.1	1	1388.7	0	253560	328153	427053		High	Peak Found	High	High	23	15.12
FALSE	High	RSIQFVDWCPTGFK	K		1xCarbamidomethyl [C9]	2	4	9	F1SHC1; F2Z5S8	1	1740.85	0	1.16262e+06	6.98619e+06	810740	Shared	High	High	High	High	78	42.84
FALSE	High	RSTSSFSCLSR	R		1xCarbamidomethyl [C8]	2	2	2	IPI00000008.1; sp	1	1287.61	0				Shared	Not Found	Not Found	Not Found	High	33	20.64
FALSE	High	RTIQFVDWCPTGFK	K		1xCarbamidomethyl [C9]	5	12	11	F1RK98; Q2HJB8; I3LDR2; P02550; F1MNF8	1	1754.87	0	3.69578e+06	1.71556e+07	14268792	Shared	High	Peak Found	High	High	55	43.17
FALSE	High	RTLLEGEESR	R			2	3	11	sp; IPI00000001.1	1	1189.62	0	845803	2.08577e+06		Shared	High	High	Not Found	High	62	19.03
FALSE	High	RTNAENEFVTIK	K			2	3	5	sp; IPI00000001.1	1	1421.74	0	666726	969884		Shared	High	High	Not Found	High	60	26.64
FALSE	High	RVDQLK	K			2	3	16	sp; IPI00000001.1	1	758.452	0	1.3664e+07	3.27171e+07	7.34133e+06	Shared	High	High	High	High	33	9.85
FALSE	High	RVELEAALQQAK	K			1	1	2	IPI00000004.1	1	1355.76	0	2.76577e+06		486352		High	Not Found	Peak Found	High	64	29.77
FALSE	High	RVLDELTLTK	K			2	3	12	IPI00000012.1; sp	1	1187.7	0	5.53748e+06	4523513	1.48907e+06	Shared	High	High	High	High	54	31.87
FALSE	High	SALEEQLQQIR	R			1	2	1	IPI00000012.1	0	1314.7	0					Not Found	Not Found	Not Found	High	76	35.02
FALSE	High	SASSLGGGFGGGSR	R			1	2	6	IPI00000010.1	0	1196.57	0	999391	1.25134e+06	398028		High	High	High	High	44	22.47
FALSE	High	SATFIGNSTAIQELFK	K			4	6	3	E1BJB1; Q2HJ81; F2Z571; F2Z5B2	0	1726.9	0	469099	533215	1.50188e+06	Shared	Peak Found	High	High	High	70	51.13
FALSE	High	SAVTALWGK	K			1	1	5	sp	0	932.52	0	199133	5688666			High	High	Not Found	High	51	35.2
FALSE	High	SCAAAGTECLISGWGN	N		2xCarbamidomethyl [C2; C9]	1	1	1	sp	0	1653.7	0	503370	214135	347003		High	Peak Found	Peak Found	High	18	41.73
FALSE	High	SCQAQPTTMAR	R		1xCarbamidomethyl [C2]	1	1	1	sp	0	1250.56	0				No Quan Values	Not Found	High	Not Found	High	43
FALSE	High	SCQISCK	K		1xAcetyl [N-Term]; 2xCarbamidomethyl [C2; C6]	2	2	2	IPI00000008.1; sp	0	924.391	0	317071	318173		Shared	Peak Found	Peak Found	Not Found	High	25	14.22
FALSE	High	SDCAFMVDNEAIYDICR	R		2xCarbamidomethyl [C3; C16]; 1xOxidation [M6]	6	17	1	F1RK98; Q2HJB8; P02550; F1SHC1; F1MNF8; F2Z5S8	0	2094.86	0		95309.5	531221	Shared	Not Found	Peak Found	High	High	111	41.97
FALSE	High	SDLEMQYETLQEELMALK	K		2xOxidation [M5; M15]	1	2	36	IPI00000010.1	0	2203.01	0	7.20273e+06	9.47847e+06	2.86298e+06		High	High	High	High	67	53.92
FALSE	High	SDLEMQYETLQEELMALK	K		1xOxidation [M]	1	2	3	IPI00000010.1	0	2187.02	0					Not Found	Not Found	Not Found	High	92	56.05
FALSE	High	SDLEMQYETLQEELMALK	K			1	2	1	IPI00000010.1	0	2171.02	0					Not Found	Not Found	Not Found	High	74	56.33
FALSE	High	SDLEMQYETLQEELMALKK	K		2xOxidation [M5; M15]	1	2	21	IPI00000010.1	1	2331.11	0	1.21106e+07	17975801	3351588		High	High	High	High	80	49.86
FALSE	High	SDLEMQYETLQEELMALKK	K		1xOxidation [M]	1	2	4	IPI00000010.1	1	2315.11	0					Not Found	Not Found	Not Found	High	104	50.08
FALSE	High	SDLEMQYETLQEELMALKK	K			1	2	1	IPI00000010.1	1	2299.12	0					Not Found	Not Found	Not Found	High	81	51.48
FALSE	High	SDLQLER	R			5	10	5	E1BJB1; F2Z5K5; F1S6M7; F2Z571; F2Z5B2	0	860.447	0	3.10428e+06	2.32984e+06		Shared	High	High	High	High	59	20.24
FALSE	High	SEIAELNR	R			1	1	4	IPI00000004.1	0	931.484	0	4.8607e+06		810853		High	Not Found	High	High	32	21.87
FALSE	High	SEIDNVK	K			2	3	16	sp; IPI00000001.1	0	804.41	0	7.7833e+06	1.49297e+07	3.08224e+06	Shared	High	High	High	High	45	13.82
FALSE	High	SEIDNVKK	K			2	3	10	sp; IPI00000001.1	1	932.505	0	5.62074e+06	9.38734e+06	8.38323e+06	Shared	High	High	High	High	40	11.85
FALSE	High	SEISELR	R			1	1	5	IPI00000011.1	0	833.436	1	3.33067e+06	7.66928e+06	1.59219e+06		High	Peak Found	High	High	28	21.31
FALSE	High	SEISELRR	R			1	1	5	IPI00000011.1	1	989.537	0	6.39819e+06	10593883	3.21453e+06		Peak Found	Peak Found	High	High	27	18.64
FALSE	High	SEITDLR	R			1	1	1	sp	0	833.436	0				No Quan Values	Peak Found	Peak Found	Peak Found	High	28	21.31
FALSE	High	SEITEL	L			1	2	1	IPI00000012.1	0	691.351	0	559057	396140			Peak Found	Peak Found	Not Found	High	23	30.21
FALSE	High	SEITELR	R			1	2	17	IPI00000012.1	0	847.452	0	49972118	61198526	2.88664e+07		High	High	High	High	38	22.38
FALSE	High	SEITELRR	R			1	2	16	IPI00000012.1	1	1003.55	0	9.18231e+07	82692766	48443122		High	High	High	High	26	18.93
FALSE	High	SEVTELR	R			1	1	2	IPI00000013.1	0	833.436	0	84338.2	738426			Peak Found	Peak Found	Not Found	High	31	18.18
FALSE	High	SEVTELRR	R			1	1	7	IPI00000013.1	1	989.537	0	884508	3.16231e+06	795817		High	High	High	High	26	15.99
FALSE	High	SFGAGGGFGSR	R			2	3	1	sp; IPI00000001.1	0	999.464	0		37666.4	102445	Shared	Not Found	Peak Found	Peak Found	High	50	23.48
FALSE	High	SFGGGTGSGF	F			2	2	1	G5E6J5; F1RYV9	0	873.374	0				No Quan Values	Not Found	Not Found	High	High	21
FALSE	High	SFGGGTGSGFTSLLMER	R		1xOxidation [M15]	7	17	21	Q2HJB8; I3LDR2; P02550; A7E1S5; F1SHC1; F1MNF8; F2Z5S8	0	1719.8	0	1.28838e+07	2.14328e+07	7.27029e+07	Shared	High	High	High	High	130	43.63
FALSE	High	SFGGGTGSGFTSLLMER	R			7	17	3	Q2HJB8; I3LDR2; P02550; A7E1S5; F1SHC1; F1MNF8; F2Z5S8	0	1703.81	0			6.97971e+06	Shared	Not Found	Not Found	High	High	118	46.98
FALSE	High	SFNTFFSETGAGK	K			5	15	5	F1RK98; P02550; A7E1S5; F1SHC1; F1MNF8	0	1392.64	0	3.35785e+06	1.89311e+06	756450	Shared	High	High	High	High	79	39.28
FALSE	High	SGAFGH	H			1	2	3	F1S6M7	0	575.257	0	487878	473341	1.59185e+06		Peak Found	Peak Found	Peak Found	High	37	10.22
FALSE	High	SGAFGHLFR	R			1	2	12	F1S6M7	0	991.511	0	9.67055e+06	6.63915e+06	32285702		High	High	High	High	75	32.36
FALSE	High	SGAFGHLFRPD	D			1	2	2	F1S6M7	0	1203.59	0	524128	219903	877964		Peak Found	Peak Found	High	High	34	34.1
FALSE	High	SGAFGHLFRPDNF	F			1	2	9	F1S6M7	0	1464.7	0	6.00309e+06	4.32567e+06	4.60652e+06		High	High	High	High	55	41.07
FALSE	High	SGAFGHLFRPDNFIF	F			1	2	2	F1S6M7	0	1724.85	0				No Quan Values	Not Found	Not Found	High	High	20
FALSE	High	SGAFGHLFRPDNFIFG	G			1	2	1	F1S6M7	0	1781.88	0					Not Found	Not Found	Not Found	High	27	51.42
FALSE	High	SGAFGHLFRPDNFIFGQ	Q			1	2	5	F1S6M7	0	1909.93	0	993288	804176	2.72329e+06		High	High	High	High	39	50.2
FALSE	High	SGAFGHLFRPDNFIFGQSGAGN	N			1	2	3	F1S6M7	0	2296.09	0	228750	251017	421923		High	Peak Found	High	High	45	48.92
FALSE	High	SGAFGHLFRPDNFIFGQSGAGNN	N			1	2	1	F1S6M7	0	2410.13	0	193881				Peak Found	Not Found	Not Found	High	53	48.58
FALSE	High	SGAFGHLFRPDNFIFGQSGAGNNW	W			1	2	5	F1S6M7	0	2596.21	0	390267	949798	421204		High	High	High	High	44	53.1
FALSE	High	SGAFGHLFRPDNFIFGQSGAGNNWAK	K			1	2	35	F1S6M7	0	2795.34	0	1.40745e+07	5.88134e+07	47586233		High	High	High	High	81	48.33
FALSE	High	SGAGGFGSR	R			1	1	1	IPI00000006.1	0	795.374	0					Not Found	Not Found	Not Found	High	23	11.86
FALSE	High	SGAGNNWAK	K			8	13	7	A5GFX6; E1BJB1; F2Z5K5; F1S6M7; E1BJK2; Q767L7; F2Z571; F2Z5B2	0	904.427	0	695495	743910	1.55818e+06	Shared	High	High	High	High	64	13.1
FALSE	High	SGFSSVSVSR	R			1	1	6	IPI00000005.1	0	1012.51	0	2.27818e+06	3.25433e+06	1.19616e+06		High	High	High	High	70	23.45
FALSE	High	SGFTSLLMER	R		1xOxidation [M8]	7	17	2	Q2HJB8; I3LDR2; P02550; A7E1S5; F1SHC1; F1MNF8; F2Z5S8	0	1156.57	0		352559	314412	Shared	Not Found	High	Peak Found	High	44	39.41
FALSE	High	SGGGFGGGGFGGGR	R			2	2	5	IPI00000008.1; sp	0	1126.5	0	1.29834e+06	1.25576e+06	717863	Shared	High	High	Peak Found	High	76	24.13
FALSE	High	SGGGFSSGSAGIINYQR	R			2	3	16	sp; IPI00000001.1	0	1657.79	0	4820448	4865553	871877	Shared	High	High	Peak Found	High	99	32.26
FALSE	High	SGGGFSSGSAGIINYQRR	R			2	3	2	sp; IPI00000001.1	1	1813.89	0		70772.2	291457	Shared	Not Found	Peak Found	High	High	28	29.6
FALSE	High	SGGGGGGGGCGGGGGVSSLR	R		1xCarbamidomethyl [C10]	1	2	6	IPI00000012.1	0	1549.68	0	401415	715915	201748		High	High	High	High	131	17.22
FALSE	High	SGGGGGGGLGSGGSIR	R			1	2	18	IPI00000010.1	0	1232.6	0	30148402	46347996	1.08181e+07		High	High	High	High	88	17.41
FALSE	High	SGGGGGGGLGSGGSIRSSY	Y			1	2	1	IPI00000010.1	1	1569.73	0				No Quan Values	Not Found	Not Found	High	High	39
FALSE	High	SGGYGGLGGFGGGSFR	R			1	1	2	IPI00000012.1	0	1432.66	0	271154	307965			Peak Found	High	Not Found	High	38	37.69
FALSE	High	SGNYVGDSDLQLER	R			1	2	1	F1S6M7	0	1552.72	0				No Quan Values	Not Found	Not Found	Not Found	High	27
FALSE	High	SGPFGQ	Q			7	12	10	E1BJB1; F2Z5K5; I3LBV1; Q2HJ81; Q767L7; F2Z571; F2Z5B2	0	592.273	0	1.75617e+06	2.32546e+06	10271382	Shared	High	High	High	High	34	19.89
FALSE	High	SGPFGQIFR	R			7	12	24	E1BJB1; F2Z5K5; I3LBV1; Q2HJ81; Q767L7; F2Z571; F2Z5B2	0	1008.53	0	1.08906e+06	1.29952e+06	4877062	Shared	High	High	High	High	54	40.46
FALSE	High	SGPFGQIFRPD	D			7	12	8	E1BJB1; F2Z5K5; I3LBV1; Q2HJ81; Q767L7; F2Z571; F2Z5B2	0	1220.61	0	332312	463865	932254	Shared	High	High	High	High	58	40.92
FALSE	High	SGPFGQIFRPDN	N			7	12	2	E1BJB1; F2Z5K5; I3LBV1; Q2HJ81; Q767L7; F2Z571; F2Z5B2	0	1334.65	0	207138	202135	809305	Shared	Peak Found	Peak Found	High	High	45	39.93
FALSE	High	SGPFGQIFRPDNF	F			7	12	22	E1BJB1; F2Z5K5; I3LBV1; Q2HJ81; Q767L7; F2Z571; F2Z5B2	0	1481.72	0	2.46239e+06	2.73828e+06	3959373	Shared	High	High	High	High	55	47.83
FALSE	High	SGPFGQIFRPDNFVF	F			5	9	6	E1BJB1; F2Z5K5; Q767L7; F2Z571; F2Z5B2	0	1727.85	0	314429	509755	1.33242e+06	Shared	High	High	High	High	34	56.79
FALSE	High	SGPFGQIFRPDNFVFG	G			5	9	3	E1BJB1; F2Z5K5; Q767L7; F2Z571; F2Z5B2	0	1784.88	0				Shared	Not Found	Not Found	Not Found	High	34	55.4
FALSE	High	SGPFGQIFRPDNFVFGQ	Q			5	9	11	E1BJB1; F2Z5K5; Q767L7; F2Z571; F2Z5B2	0	1912.93	0	1.74369e+06	2.12538e+06	6288415	Shared	High	High	High	High	60	53.71
FALSE	High	SGPFGQIFRPDNFVFGQS	S			5	9	1	E1BJB1; F2Z5K5; Q767L7; F2Z571; F2Z5B2	0	1999.97	0		221176	260290	Shared	Not Found	Peak Found	Peak Found	High	49	53.1
FALSE	High	SGPFGQIFRPDNFVFGQSGAGN	N			5	9	5	E1BJB1; F2Z5K5; Q767L7; F2Z571; F2Z5B2	0	2299.09	0	349856	721502	1.12009e+06	Shared	Peak Found	High	High	High	48	51.86
FALSE	High	SGPFGQIFRPDNFVFGQSGAGNN	N			5	9	5	E1BJB1; F2Z5K5; Q767L7; F2Z571; F2Z5B2	0	2413.13	0	187989	503154	973075	Shared	Peak Found	High	High	High	50	51.54
FALSE	High	SGPFGQIFRPDNFVFGQSGAGNNW	W			5	9	6	E1BJB1; F2Z5K5; Q767L7; F2Z571; F2Z5B2	0	2599.21	0	522252	950160	1.04851e+06	Shared	High	High	High	High	40	55.85
FALSE	High	SGPFGQIFRPDNFVFGQSGAGNNWAK	K			5	9	46	E1BJB1; F2Z5K5; Q767L7; F2Z571; F2Z5B2	0	2798.34	0	8.61847e+07	1.44461e+08	1.73636e+08	Shared	High	High	High	High	101	51.39
FALSE	High	SGVTTCLR	R		1xCarbamidomethyl [C6]	5	9	6	E1BJB1; F2Z5K5; Q767L7; F2Z571; F2Z5B2	0	893.451	0	3.45411e+06	6678892	16180311	Shared	High	High	High	High	39	18.35
FALSE	High	SGVTTSLR	R			4	6	5	A5GFX6; F1S6M7; I3LBV1; Q2HJ81	0	820.452	0	2.29135e+06	2.04342e+06	8477178	Shared	High	High	High	High	45	17.15
FALSE	High	SIDNEALYDICFR	R		1xCarbamidomethyl [C11]	1	2	1	E1BJB1	0	1615.74	0				No Quan Values	High	Not Found	Not Found	High	45
FALSE	High	SIIAEVK	K			6	7	2	sp; IPI00000008.1; IPI00000001.1; IPI00000005.1; sp; IPI00000002.1	0	759.461	0				Shared	Not Found	Not Found	Not Found	High	36	24.67
FALSE	High	SIQFVD	D			2	4	3	F1SHC1; F2Z5S8	0	708.356	0		480139	922150	Shared	Not Found	High	Peak Found	High	21	32.4
FALSE	High	SIQFVDWCPTGF	F		1xCarbamidomethyl [C8]	2	4	5	F1SHC1; F2Z5S8	0	1456.66	0	135095	240479	1.27579e+06	Shared	High	High	High	High	38	54.18
FALSE	High	SIQFVDWCPTGFK	K		1xCarbamidomethyl [C8]	3	5	47	G5E6J5; F1SHC1; F2Z5S8	0	1584.75	0	1.36584e+08	3.42397e+08	5.20599e+08	Shared	High	High	High	High	65	47.21
FALSE	High	SIQFVDWCPTGFKVGINYQPPTVVPGGDLAK	K		1xCarbamidomethyl [C8]	2	3	1	F1SHC1; F2Z5S8	1	3390.72	0			427412	Shared	Not Found	Not Found	High	High	23	52.99
FALSE	High	SISDAEQR	R			2	3	4	sp; IPI00000001.1	0	905.432	0	372969	406800	71912.9	Shared	Peak Found	High	Peak Found	High	48	10.52
FALSE	High	SISISV	V			6	7	1	IPI00000006.1; sp; IPI00000008.1; IPI00000001.1; sp; IPI00000007.1	0	605.35	0				Shared	Not Found	Not Found	Not Found	High	19	34.71
FALSE	High	SISISVAGGGGGFGAAGGFGGR	R			2	2	23	IPI00000008.1; sp	0	1838.91	0	3.49172e+06	1.86642e+06	1.01332e+06	Shared	High	High	High	High	120	41.02
FALSE	High	SISISVAR	R			2	3	35	sp; IPI00000001.1	0	832.489	0	85041930	102413986	26179070	Shared	High	High	High	High	38	25.51
FALSE	High	SISMSVAGSR	R		1xOxidation [M4]	1	1	2	IPI00000004.1	0	1010.49	0	814480		100575		High	Not Found	High	High	44	15.21
FALSE	High	SISMSVAGSR	R			1	1	1	IPI00000004.1	0	994.499	0	840385		398482		High	Not Found	Peak Found	High	37	23.09
FALSE	High	SISVAR	R			2	3	2	sp; IPI00000001.1	0	632.373	0	593749	621062		Shared	High	Peak Found	Not Found	High	22	25.53
FALSE	High	SKAEAEALYQTK	K			2	2	3	IPI00000006.1; IPI00000004.1	1	1338.69	0	2.70219e+06			Shared	High	Not Found	Not Found	High	58	19.15
FALSE	High	SKAEAESLYQSK	K			2	3	20	sp; IPI00000001.1	1	1340.67	0	5.75783e+07	6.53222e+07	19251794	Shared	High	High	High	High	77	17.52
FALSE	High	SKAEAESLYQSKYEELQITAGR	R			2	3	12	sp; IPI00000001.1	2	2501.25	0	1.97027e+06	2.59934e+06	3.15014e+06	Shared	High	High	High	High	142	34.77
FALSE	High	SKEEAEAL	L			2	2	1	IPI00000008.1; sp	1	876.431	0	91687.1	220389		Shared	Peak Found	Peak Found	Not Found	High	19	15.79
FALSE	High	SKEEAEALYH	H			2	2	6	IPI00000008.1; sp	1	1176.55	0	456913	491330	80596.1	Shared	High	High	Peak Found	High	62	17.98
FALSE	High	SKEEAEALYHSK	K			2	2	18	IPI00000008.1; sp	1	1391.68	0	37558755	3.24899e+07	1.21799e+07	Shared	High	High	High	High	77	16.26
FALSE	High	SKEEAEALYHSKYEELQVTVGR	R			2	2	3	IPI00000008.1; sp	2	2566.28	0	425331	281503	276229	Shared	High	Peak Found	Peak Found	High	96	34.52
FALSE	High	SKELTTEIDNNIEQISS	S			1	2	1	IPI00000012.1	1	1920.94	0				No Quan Values	High	Not Found	Not Found	High	29
FALSE	High	SKELTTEIDNNIEQISSYK	K			1	2	17	IPI00000012.1	1	2212.1	0	2.31494e+07	1.66164e+07	6.04555e+06		High	High	High	High	155	41.66
FALSE	High	SKLEFS	S			5	13	1	P02550; A7E1S5; F1SHC1; F1MNF8; F2Z5S8	1	710.372	0			394555	Shared	Not Found	Not Found	High	High	21	21.2
FALSE	High	SKLEFSIYPAPQ	Q			5	13	5	P02550; A7E1S5; F1SHC1; F1MNF8; F2Z5S8	1	1379.72	0	2601885	8.26825e+06	12702373	Shared	Peak Found	High	High	High	49	39.98
FALSE	High	SKLEFSIYPAPQVSTAVVEPY	Y			5	13	8	P02550; A7E1S5; F1SHC1; F1MNF8; F2Z5S8	1	2325.2	0	4.08114e+06	7.94111e+06	2.86998e+07	Shared	Peak Found	Peak Found	High	High	37	48.72
FALSE	High	SKLEFSIYPAPQVSTAVVEPYNSILTTH	H			5	13	14	P02550; A7E1S5; F1SHC1; F1MNF8; F2Z5S8	1	3091.6	0	3937392	9109737	2.74387e+07	Shared	High	Peak Found	High	High	94	50.91
FALSE	High	SKLEFSIYPAPQVSTAVVEPYNSILTTHTTLEH	H			5	13	2	P02550; A7E1S5; F1SHC1; F1MNF8; F2Z5S8	1	3672.88	0		126627		Shared	Not Found	Peak Found	Not Found	High	67	50.41
FALSE	High	SKLEFSIYPAPQVSTAVVEPYNSILTTHTTLEHSDCAF	F		1xCarbamidomethyl [C36]	4	12	4	P02550; F1SHC1; F1MNF8; F2Z5S8	1	4253.07	0		1.67643e+06	5.25789e+06	Shared	High	Peak Found	High	High	31	52.77
FALSE	High	SLAETEGR	R			1	2	1	IPI00000012.1	0	862.426	0	92589.7	105651			Peak Found	Peak Found	Not Found	High	23	11.97
FALSE	High	SLDLDSIIA	A			3	4	1	IPI00000006.1; sp; IPI00000001.1	0	946.509	0	130601			Shared	High	Not Found	Not Found	High	23	47.94
FALSE	High	SLDLDSIIAEVK	K			2	3	52	sp; IPI00000001.1	0	1302.72	0	1.5496e+08	1.82971e+08	4.37119e+07	Shared	High	High	High	High	89	51.03
FALSE	High	SLDLDSIIAEVKAQ	Q			2	3	1	sp; IPI00000001.1	1	1501.81	0				Shared	Not Found	Not Found	Not Found	High	36	52.82
FALSE	High	SLDLDSIIAEVKAQYEDIAQK	K			2	2	4	sp; IPI00000001.1	1	2349.22	0				No Quan Values	Not Found	Not Found	High	High	87
FALSE	High	SLDLDSIIAEVR	R			1	1	1	IPI00000006.1	0	1330.72	0	373716	481207			Peak Found	Peak Found	Not Found	High	24	56.43
FALSE	High	SLEASLAETEGR	R			1	2	1	IPI00000012.1	0	1262.62	0	299410	127520			Peak Found	Peak Found	Not Found	High	75	29.3
FALSE	High	SLEDTK	K			1	2	30	IPI00000010.1	0	692.346	0	735889	2.6603e+06	1.42659e+06		High	High	High	High	41	8.6
FALSE	High	SLGGGFGGGSR	R			1	2	8	IPI00000010.1	0	951.464	0	6862592	9088932	1.44105e+06		High	High	Peak Found	High	59	20.62
FALSE	High	SLGGGFSSGGFSGGSFSR	R			1	2	1	IPI00000012.1	0	1650.75	0				No Quan Values	High	Not Found	Not Found	High	78
FALSE	High	SLGGGTGSGMGTLLISK	K		1xOxidation [M10]	8	15	95	E1BJB1; F2Z5K5; F1S6M7; I3LBV1; Q2HJ81; Q767L7; F2Z571; F2Z5B2	0	1551.8	0	6.48882e+07	4.43617e+07	7.10056e+07	Shared	High	High	High	High	114	31.39
FALSE	High	SLGGGTGSGMGTLLISK	K			8	15	13	E1BJB1; F2Z5K5; F1S6M7; I3LBV1; Q2HJ81; Q767L7; F2Z571; F2Z5B2	0	1535.81	0	8746098	12810101	1.098e+08	Shared	High	High	High	High	113	38.29
FALSE	High	SLGGGTGSGMGTLLISKIR	R			7	13	1	E1BJB1; F2Z5K5; I3LBV1; Q2HJ81; Q767L7; F2Z571; F2Z5B2	1	1804.99	0			198336	Shared	Not Found	Not Found	High	High	79	42.24
FALSE	High	SLILNR	R			1	1	1	sp	0	715.446	0					Not Found	Not Found	Not Found	High	25	23.82
FALSE	High	SLLEGEGSSGGGGR	R			1	2	20	IPI00000012.1	0	1262.6	0	1.70926e+07	2.54153e+07	2.77328e+06		High	High	High	High	75	20.11
FALSE	High	SLLLSIK	K			1	2	1	IPI00000010.1	0	773.513	0	392596	490404			Peak Found	Peak Found	Not Found	High	16	37.33
FALSE	High	SLLQPLNVEIDPEIQK	K			2	3	3	sp; IPI00000001.1	0	1836.01	0	676686	403940		Shared	High	Peak Found	Not Found	High	64	47.22
FALSE	High	SLLQPLNVK	K			2	2	1	IPI00000008.1; sp	0	1011.62	0				Shared	Not Found	Not Found	Not Found	High	22	36.71
FALSE	High	SLLTPL	L			1	1	1	sp	0	643.403	0					Not Found	Not Found	Not Found	High	25	42.78
FALSE	High	SLNNQFAS	S			2	3	2	sp; IPI00000001.1	0	880.416	0	521029	668190		Shared	Peak Found	Peak Found	Not Found	High	15	22.99
FALSE	High	SLNNQFASF	F			2	3	1	sp; IPI00000001.1	0	1027.48	0	179522	494952		Shared	Peak Found	Peak Found	Not Found	High	17	40.05
FALSE	High	SLNNQFASFIDK	K			2	3	27	sp; IPI00000001.1	0	1383.69	0	1.07495e+08	1.38585e+08	46815928	Shared	High	High	Peak Found	High	101	41.9
FALSE	High	SLNNQFASFIDKVR	R			2	3	4	sp; IPI00000001.1	1	1638.86	0				Shared	Not Found	Not Found	Not Found	High	103	45.43
FALSE	High	SLPQNIPPLTQTPVVVPPFLQPEVMGVSK	K		1xOxidation [M25]	1	1	1	sp	0	3128.71	0	170873	1.52712e+06			Peak Found	Peak Found	Not Found	High	16	55.6
FALSE	High	SLTEELAYLK	K			1	2	2	IPI00000012.1	0	1166.63	0	347342	200210			High	Peak Found	Not Found	High	56	41.12
FALSE	High	SLVGLGGTK	K			2	2	14	IPI00000008.1; sp	0	831.493	0	63485639	53565657	2.01443e+07	Shared	High	High	High	High	58	25.01
FALSE	High	SLVGLGGTKSISI	I			2	2	1	IPI00000008.1; sp	1	1231.73	0		176003		Shared	Not Found	High	Not Found	High	17	41.07
FALSE	High	SLVNLGGSK	K			2	3	4	sp; IPI00000001.1	0	874.499	0	134352466	173795056	54702382	Shared	Peak Found	High	Peak Found	High	47	25.41
FALSE	High	SLVNLGGSKSISISVAR	R			2	3	11	sp; IPI00000001.1	1	1687.97	0	1.54475e+06	1.72857e+06		Shared	High	High	High	High	110	37.63
FALSE	High	SLYGLGGSK	K			1	1	8	IPI00000005.1	0	881.473	0	3.46554e+06	7.08089e+06			High	High	Not Found	High	65	25.49
FALSE	High	SLYGLGGSKR	R			1	1	4	IPI00000005.1	1	1037.57	0			452190		Not Found	High	Peak Found	High	41	21.97
FALSE	High	SLYNLR	R			1	1	3	IPI00000004.1	0	765.425	0	5.44587e+06		612619		High	Not Found	Peak Found	High	23	25.94
FALSE	High	SLYQSK	K			2	3	1	sp; IPI00000001.1	0	725.383	0				Shared	Not Found	Not Found	Not Found	High	18	12.23
FALSE	High	SMDNNRSLDLDSIIAEVK	K		1xOxidation [M2]	2	3	3	sp; IPI00000001.1	1	2036	1		132364		Shared	Not Found	High	Not Found	High	45	46.06
FALSE	High	SMDNSRNLDLDSIIAEVK	K		1xOxidation [M2]	2	2	1	IPI00000008.1; sp	1	2036	0				No Quan Values	Not Found	High	Not Found	High	37	46.06
FALSE	High	SNLEAQITDVR	R			1	2	1	IPI00000010.1	0	1245.64	0				No Quan Values	Not Found	Not Found	Not Found	High	78
FALSE	High	SNTTAIAEAWAR	R			7	15	7	F1RK98; Q2HJB8; I3LDR2; P02550; F1SHC1; F1MNF8; F2Z5S8	0	1290.64	0	4.70827e+06	1.20309e+07	2.88232e+07	Shared	High	High	High	High	68	33.76
FALSE	High	SPAQIL	L			1	1	2	sp	0	628.366	0	38698.5	766903			Peak Found	High	Not Found	High	37	29.7
FALSE	High	SPAQILQWQVLSN	N			1	1	1	sp	0	1483.79	0		227705			Not Found	High	Not Found	High	44	49.29
FALSE	High	SPAQILQWQVLSNTVPAK	K			1	1	9	sp	0	1980.09	0	1.48377e+06	6897700			High	High	Not Found	High	103	48.01
FALSE	High	SPATLNSR	R			1	1	6	sp	0	845.448	0	214820	204867	516579		High	High	High	High	30	11.7
FALSE	High	SQIQAQISALEEQLQQIR	R			1	2	2	IPI00000012.1	0	2083.11	0	31879				Peak Found	Not Found	Not Found	High	103	55.32
FALSE	High	SQLALK	K			1	2	4	IPI00000012.1	0	659.409	0	93868				High	Not Found	Not Found	High	36	17.38
FALSE	High	SQYEQLAEQN	N			1	2	1	IPI00000012.1	0	1209.54	0					Not Found	Not Found	Not Found	High	17	22.28
FALSE	High	SQYEQLAEQNR	R			1	2	18	IPI00000012.1	0	1365.64	0	3.21803e+07	3.55438e+07	1.45545e+07		High	High	High	High	66	21.22
FALSE	High	SQYEQLAEQNRK	K			1	2	12	IPI00000012.1	1	1493.73	0	60886708	41106816	15783135		High	High	High	High	60	18.33
FALSE	High	SQYEQLAEQNRKDAEAWFNEK	K			1	2	4	IPI00000012.1	2	2584.21	0		1.1449e+06	2.21444e+06		High	High	High	High	26	38.84
FALSE	High	SRAEAESWYQTK	K			1	1	7	IPI00000005.1	1	1455.69	0	610435	975026	335966		High	High	High	High	52	22.61
FALSE	High	SRQFSSR	R		1xAcetyl [N-Term]	1	2	6	IPI00000001.1	1	909.454	0	407657	396624	961072		High	High	High	High	31	13.46
FALSE	High	SRSGGGGGGGLGSGGSIR	R			1	2	16	IPI00000010.1	1	1475.73	0	1.10159e+06	1.14463e+06	1.4607e+06		High	High	High	High	109	15.44
FALSE	High	SSGGFSGGSFSR	R			1	2	6	IPI00000012.1	0	1132.5	0	1.04502e+06	1548087	756656		High	High	High	High	59	22.95
FALSE	High	SSGSAGIINYQR	R			2	3	2	sp; IPI00000001.1	0	1252.63	0				Shared	Not Found	High	Not Found	High	73	24.27
FALSE	High	SSGSAVVSGGSR	R			2	2	7	IPI00000008.1; sp	0	1050.52	0	211179	280773		Shared	High	High	Not Found	High	54	10.5
FALSE	High	SSGSAVVSGGSRR	R			2	2	1	IPI00000008.1; sp	1	1206.62	0		1.22041e+06		Shared	Not Found	High	Not Found	High	26	9.8
FALSE	High	SSGSSYPSLLQCLK	K		1xCarbamidomethyl [C12]	1	1	9	sp	0	1526.75	0	1.74197e+06	1.11568e+06	2.71353e+06		High	High	High	High	66	41.63
FALSE	High	SSLGGGFGGGSR	R			1	2	1	IPI00000010.1	0	1038.5	0					Not Found	Not Found	Not Found	High	27	20.96
FALSE	High	SSPATLNSR	R			1	1	12	sp	0	932.48	0	15167528	9.92048e+06	1.23034e+07		High	High	High	High	49	12.7
FALSE	High	SSSKGSLGGGFSSGGFSGGSFSR	R			1	2	2	IPI00000012.1	1	2096.96	0				No Quan Values	Not Found	High	Not Found	High	43
FALSE	High	SSSSGSVGESSSK	K			1	2	1	IPI00000012.1	0	1185.52	0	80180.9	82571.9			Peak Found	High	Not Found	High	40	6
FALSE	High	SSSSGSVGESSSKGP	P			1	2	5	IPI00000012.1	1	1339.6	0		184168	567852		Not Found	Peak Found	High	High	80	10.61
FALSE	High	SSTFIGNSTAIQELFK	K			1	2	5	F1S6M7	0	1742.9	0	349399	268631	634172		High	High	High	High	63	50.61
FALSE	High	SSTISSNVASK	K			2	2	7	IPI00000008.1; sp	0	1080.55	0	1.25236e+06	3.47838e+06		Shared	Peak Found	Peak Found	Not Found	High	49	14.18
FALSE	High	SSYFVEWIPNNVK	K			8	11	5	E1BJB1; F2Z5K5; F1S6M7; I3LBV1; Q2HJ81; Q767L7; F2Z571; F2Z5B2	0	1582.79	0	5.299e+06	7325177	11441843	Shared	High	High	Peak Found	High	38	46.34
FALSE	High	SSYPGQITGN	N			1	1	4	sp	0	1023.47	0	1.48701e+06	1.12362e+06	1.90963e+06		High	Peak Found	High	High	24	22.32
FALSE	High	STAIQELFK	K			8	11	11	E1BJB1; F2Z5K5; F1S6M7; I3LBV1; Q2HJ81; Q767L7; F2Z571; F2Z5B2	0	1036.57	0	2.27914e+07	2.30668e+07	63781243	Shared	High	High	High	High	47	40.57
FALSE	High	STFIGNSTAIQELFK	K			1	2	4	F1S6M7	0	1655.86	0	685918	681345	1.5252e+06		High	High	High	High	62	50.42
FALSE	High	STMQELNSR	R		1xOxidation [M3]	1	2	41	IPI00000010.1	0	1081.49	0	3.52304e+06	4.55465e+06	1.09383e+06		High	High	High	High	57	17.9
FALSE	High	STMQELNSR	R			1	2	12	IPI00000010.1	0	1065.5	0	2.73043e+07	5.39049e+07	1.41098e+07		High	High	High	High	42	17.9
FALSE	High	STSSFSCLSR	R		1xCarbamidomethyl [C7]	2	2	6	IPI00000008.1; sp	0	1131.51	0	5614383	3.7091e+06	2.64239e+06	Shared	High	High	High	High	50	23.92
FALSE	High	STYGGGLSVSSR	R			1	1	1	IPI00000013.1	0	1170.57	0				No Quan Values	Not Found	Not Found	Not Found	High	56
FALSE	High	STYGGGLSVSSSR	R			1	1	1	IPI00000011.1	0	1257.61	0		152663			Not Found	Peak Found	Not Found	High	64	22.53
FALSE	High	SVAEITNACFEPANQMVK	K		1xCarbamidomethyl [C9]; 1xOxidation [M16]	4	13	2	F1RK98; P02550; F1MNF8; F2Z5S8	0	2024.94	0		297235	889707	Shared	High	Peak Found	High	High	48	33.9
FALSE	High	SVAEITNACFEPANQMVK	K		1xCarbamidomethyl [C9]	4	13	2	F1RK98; P02550; F1MNF8; F2Z5S8	0	2008.95	0			1.31837e+06	Shared	Not Found	Not Found	High	High	77	37.87
FALSE	High	SVAGGGGGFGAAGGFGGR	R			2	2	2	IPI00000008.1; sp	0	1438.68	0	293812	253223		Shared	Peak Found	High	Not Found	High	118	29.89
FALSE	High	SVDYGK	K			6	17	5	F1RK98; P02550; A7E1S5; F1SHC1; F1MNF8; F2Z5S8	0	668.325	0	323936	1.04618e+06	1.40967e+06	Shared	Peak Found	High	High	High	42	19.66
FALSE	High	SVDYGKK	K			6	17	9	F1RK98; P02550; A7E1S5; F1SHC1; F1MNF8; F2Z5S8	1	796.42	0	1.44098e+06	6.26299e+06	5069417	Shared	High	High	High	High	32	16.83
FALSE	High	SVEADINGLR	R			3	4	2	IPI00000012.1; IPI00000011.1; sp	0	1073.56	0	546290	191384	152011	Shared	High	Peak Found	Peak Found	High	44	29.81
FALSE	High	SVLDVVR	R			7	14	5	E1BJB1; F1S6M7; I3LBV1; Q2HJ81; Q767L7; F2Z571; F2Z5B2	0	787.467	0	926923	1.67762e+06	2.36714e+06	Shared	High	High	High	High	36	30.06
FALSE	High	SVMPSPK	K		1xOxidation [M3]	5	10	19	E1BJB1; I3LBV1; Q2HJ81; E1BJK2; F2Z5B2	0	761.386	0	859470	1.00036e+06	4.43996e+06	Shared	Peak Found	High	High	High	27	16.37
FALSE	High	SVMPSPK	K			5	10	39	E1BJB1; I3LBV1; Q2HJ81; E1BJK2; F2Z5B2	0	745.391	0	12232413	17367077	62462407	Shared	High	High	High	High	30	16.36
FALSE	High	SVNQSLLQPLNVK	K			2	2	2	IPI00000008.1; sp	0	1439.82	0				Shared	Not Found	High	Not Found	High	44	38.33
FALSE	High	SVTDTNVILSMDNSR	R		1xOxidation [M11]	2	2	1	IPI00000008.1; sp	0	1667.79	0				No Quan Values	Not Found	Not Found	Not Found	High	33
FALSE	High	SVVPSPK	K			4	6	48	F2Z5K5; F1S6M7; Q767L7; F2Z571	0	713.419	0	2.02414e+07	18265373	77519246	Shared	High	High	High	High	34	16.2
FALSE	High	SYFVEWIPNNVK	K			8	11	1	E1BJB1; F2Z5K5; F1S6M7; I3LBV1; Q2HJ81; Q767L7; F2Z571; F2Z5B2	0	1495.76	0	1.54496e+06	2591962	4.81208e+06	Shared	Peak Found	High	Peak Found	High	27	46.16
FALSE	High	SYGGGSGGGFSASSLGGGFGGGSR	R			1	2	6	IPI00000010.1	0	2022.89	0	1.17e+06	2218465			High	High	High	High	179	35.94
FALSE	High	SYGSGLGVGGGFSSSSGR	R			1	1	1	IPI00000005.1	0	1618.75	0				No Quan Values	Not Found	High	Not Found	High	89
FALSE	High	SYHGDSDLQLER	R			2	6	3	E1BJB1; F2Z5B2	0	1419.65	0	8.29945e+06	7327587	7521005	Shared	High	Peak Found	Peak Found	High	34	22.04
FALSE	High	SYLDNILGER	R			1	1	1	IPI00000006.1	0	1179.6	0				No Quan Values	Not Found	Not Found	Not Found	High	51
FALSE	High	TAAENDFVTL	L			2	2	1	IPI00000008.1; sp	0	1080.52	0				Shared	Not Found	Not Found	Not Found	High	24	40.3
FALSE	High	TAAENDFVTLK	K			2	2	16	IPI00000008.1; sp	0	1208.62	0	3.79343e+07	3.05302e+07	1.24629e+07	Shared	High	High	High	High	77	31.2
FALSE	High	TAAENDFVTLKK	K			2	2	7	IPI00000008.1; sp	1	1336.71	0	1.38228e+07	9.3718e+06	1.89846e+06	Shared	High	High	Peak Found	High	85	25.4
FALSE	High	TAAENDFVVLK	K			1	1	2	IPI00000004.1	0	1206.64	0	5132297				High	Not Found	Not Found	High	67	34.27
FALSE	High	TAAENDFVVLKK	K			1	1	2	IPI00000004.1	1	1334.73	0	2.31726e+06		152643		High	Not Found	Peak Found	High	51	28.55
FALSE	High	TAAENEFVTLK	K			2	2	6	IPI00000006.1; IPI00000005.1	0	1222.63	0	3.60948e+06	6.15928e+06	1.28409e+06	Shared	High	High	High	High	63	31.79
FALSE	High	TAAENEFVTLKK	K			2	2	4	IPI00000006.1; IPI00000005.1	1	1350.73	0	1144406	1.55025e+06	452115	Shared	Peak Found	High	Peak Found	High	31	26.21
FALSE	High	TAAYVNAIEK	K			1	1	1	P00366	0	1079.57	0				Not Reliable	Not Found	Not Found	Not Found	High	25
FALSE	High	TAIQELFK	K			8	11	1	E1BJB1; F2Z5K5; F1S6M7; I3LBV1; Q2HJ81; Q767L7; F2Z571; F2Z5B2	0	949.535	0				No Quan Values	Not Found	Not Found	Not Found	High	37
FALSE	High	TAVCDIPPR	R	1	1xCarbamidomethyl [C4]	5	6	227	E1BJB1; F2Z5K5; Q767L7; F2Z571; F2Z5B2	0	1028.52	0	1.49987e+08	3.92001e+08	5.65896e+08	Shared	High	High	High	High	59	19.79
FALSE	High	TDLEMQIEGLK	K		1xOxidation [M5]	1	1	5	IPI00000013.1	0	1292.64	0	163764	621663			High	High	Not Found	High	80	38.04
FALSE	High	TDLEMQIEGLKEELAYLR	R		1xOxidation [M5]	1	1	7	IPI00000013.1	1	2167.1	0	324224	1.24027e+06			High	High	Not Found	High	88	56.41
FALSE	High	TDLEMQIESLNEELAYMK	K		2xOxidation [M5; M17]	1	1	3	IPI00000014.1	0	2189	0	1.32587e+06				High	Not Found	Not Found	High	49	50.64
FALSE	High	TDLEMQIESLNEELAYMKK	K		2xOxidation [M5; M17]	1	1	1	IPI00000014.1	1	2317.09	0				No Quan Values	High	Not Found	Not Found	High	67
FALSE	High	TEELAYLK	K			1	2	4	IPI00000012.1	0	966.514	0	117152				Peak Found	Not Found	Not Found	High	43	29.27
FALSE	High	TEELNKEVASNSELVQSSR	R			1	1	7	IPI00000013.1	1	2120.05	0	212149	629697	144134		High	High	Peak Found	High	128	28.15
FALSE	High	TEELNR	R			1	1	10	IPI00000011.1	0	761.379	0	211661	1.23138e+06	117626		Peak Found	High	Peak Found	High	41	9.55
FALSE	High	TEEREQIK	K			1	1	1	IPI00000004.1	1	1032.53	0	78541.4	205482	94248.8		Peak Found	High	Peak Found	High	23	8.92
FALSE	High	TEFQTNLVPYPR	R			7	17	2	F1RK98; Q2HJB8; I3LDR2; P02550; F1SHC1; F1MNF8; F2Z5S8	0	1464.75	0		163564		Shared	Not Found	High	Not Found	High	56	37.6
FALSE	High	TEGAELVDSVLDVVR	R			6	12	11	E1BJB1; F1S6M7; Q2HJ81; Q767L7; F2Z571; F2Z5B2	0	1601.84	0	733180	1.19018e+06	1.60551e+06	Shared	High	High	High	High	110	53.87
FALSE	High	TFFSETGAGK	K			5	15	4	F1RK98; P02550; A7E1S5; F1SHC1; F1MNF8	0	1044.5	0	1.4408e+06	1.48309e+06	3.7431e+06	Shared	Peak Found	High	High	High	59	26.49
FALSE	High	TFIGNSTAIQELFK	K			8	11	5	E1BJB1; F2Z5K5; F1S6M7; I3LBV1; Q2HJ81; Q767L7; F2Z571; F2Z5B2	0	1568.83	0	495312	749552	1258812	Shared	High	High	High	High	82	50.18
FALSE	High	TFSVMPSPK	K		1xOxidation [M5]	4	9	1	E1BJB1; I3LBV1; Q2HJ81; F2Z5B2	0	1009.5	0	100231			Shared	Peak Found	Not Found	Not Found	High	26	23.37
FALSE	High	TFSVMPSPK	K			4	9	4	E1BJB1; I3LBV1; Q2HJ81; F2Z5B2	0	993.507	0	447800	2.05783e+06	6.7339e+06	Shared	High	Peak Found	High	High	44	29.87
FALSE	High	TFSVVPSPK	K			4	6	16	F2Z5K5; F1S6M7; Q767L7; F2Z571	0	961.535	0	2.88408e+06	3.4723e+06	8.23531e+06	Shared	High	High	High	High	42	29.27
FALSE	High	TGSGFTSLLMER	R		1xOxidation [M10]	7	17	1	Q2HJB8; I3LDR2; P02550; A7E1S5; F1SHC1; F1MNF8; F2Z5S8	0	1314.64	0		181983		Shared	Not Found	Peak Found	Not Found	High	42	39.31
FALSE	High	TGSGMGTLLISK	K			8	15	1	E1BJB1; F2Z5K5; F1S6M7; I3LBV1; Q2HJ81; Q767L7; F2Z571; F2Z5B2	0	1164.63	0				No Quan Values	Not Found	Not Found	High	High	26
FALSE	High	TGSYHGDSDLQLER	R			2	6	1	E1BJB1; F2Z5B2	0	1577.72	0				Not Reliable	Not Found	Not Found	Not Found	High	42
FALSE	High	THNLEPY	Y			2	3	2	sp; IPI00000001.1	0	873.41	0				Shared	Not Found	Not Found	Not Found	High	23	20.84
FALSE	High	THNLEPYFESF	F			2	3	6	sp; IPI00000001.1	0	1383.62	0	1.16061e+06	1216833		Shared	High	High	High	High	49	43.49
FALSE	High	THNLEPYFESFIN	N			2	3	1	sp; IPI00000001.1	0	1610.75	0	146183	110651		Shared	Peak Found	Peak Found	Not Found	High	46	47.65
FALSE	High	THNLEPYFESFINNLR	R			2	3	37	sp; IPI00000001.1	0	1993.98	0	1.42015e+07	2.52547e+07	6.51319e+06	Shared	High	High	High	High	80	53.69
FALSE	High	THNLEPYFESFINNLRR	R			2	3	4	sp; IPI00000001.1	1	2150.08	0	151433	625339		Shared	Peak Found	Peak Found	Not Found	High	41	51.68
FALSE	High	THSLGGGTGSGMGTLLISK	K		1xOxidation [M12]	8	15	1	E1BJB1; F2Z5K5; F1S6M7; I3LBV1; Q2HJ81; Q767L7; F2Z571; F2Z5B2	0	1789.91	0				Shared	Not Found	Not Found	Not Found	High	57	28.06
FALSE	High	THSLGGGTGSGMGTLLISK	K			8	15	2	E1BJB1; F2Z5K5; F1S6M7; I3LBV1; Q2HJ81; Q767L7; F2Z571; F2Z5B2	0	1773.92	0		136630	766396	Shared	Not Found	High	High	High	40	34.82
FALSE	High	TIDDLK	K			2	4	26	IPI00000012.1; IPI00000010.1	0	704.383	0	4.08554e+07	42577320	1.83706e+07	Shared	High	High	High	High	48	16.5
FALSE	High	TIDDLKDQIVDLTVGNNK	K			1	2	7	IPI00000010.1	1	2001.05	0	628232	1107633			High	High	High	High	96	45.41
FALSE	High	TIDDLKNQIL	L			1	2	1	IPI00000012.1	1	1172.65	0					Not Found	Not Found	Not Found	High	21	37.58
FALSE	High	TIDDLKNQILNL	L			1	2	1	IPI00000012.1	1	1399.78	0					Not Found	Not Found	Not Found	High	21	47.05
FALSE	High	TIDDLKNQILNLTTDNAN	N			1	2	1	IPI00000012.1	1	2016.02	0	541811	334874			Peak Found	High	Not Found	High	24	46.91
FALSE	High	TIDDLKNQILNLTTDNANILLQIDNAR	R			1	2	8	IPI00000012.1	1	3052.63	0				No Quan Values	High	High	High	High	134
FALSE	High	TIEDLR	R			2	2	10	IPI00000011.1; IPI00000013.1	0	746.404	1	6702888	17893581	2.53808e+06	Shared	High	High	High	High	38	19.29
FALSE	High	TIGGGDDSFNTFFSETGAGK	K			5	14	279	F1RK98; P02550; A7E1S5; F1SHC1; F1MNF8	0	2007.89	0	1.80461e+08	2.86889e+08	4.16185e+08	Shared	High	High	High	High	143	44.14
FALSE	High	TIGGGDDSFNTFFSETGAGKHVPR	R			5	14	3	F1RK98; P02550; A7E1S5; F1SHC1; F1MNF8	1	2497.17	0		651104	1075226	Shared	Not Found	Peak Found	Peak Found	High	63	40.22
FALSE	High	TIGGGDDSFTTFFCETGAGK	K		1xCarbamidomethyl [C14]	1	1	38	F2Z5S8	0	2067.9	0	1.44004e+07	3.28179e+07	7.73677e+07		High	High	High	High	128	46.67
FALSE	High	TINQSLLQPLNVEIDPEIQK	K			2	3	12	sp; IPI00000001.1	0	2292.24	0	1.56687e+06	3.91313e+06		Shared	High	High	High	High	75	48.89
FALSE	High	TINQSLLQPLNVEIDPEIQKVK	K			2	3	1	sp; IPI00000001.1	1	2519.41	0				No Quan Values	Not Found	High	Not Found	High	37
FALSE	High	TIQFVD	D			5	12	1	F1RK98; Q2HJB8; I3LDR2; P02550; F1MNF8	0	722.372	0			663249	Shared	Not Found	Not Found	Peak Found	High	20	32.98
FALSE	High	TIQFVDWCPTGFK	K		1xCarbamidomethyl [C8]	5	12	59	F1RK98; Q2HJB8; I3LDR2; P02550; F1MNF8	0	1598.77	0	1.01921e+08	2.83986e+08	4.12044e+08	Shared	High	High	High	High	59	47.55
FALSE	High	TIQFVDWCPTGFKVGINYEPPTVVPGGDLAK	K		1xCarbamidomethyl [C8]	1	1	1	P02550	1	3405.72	0				Not Reliable	Not Found	Not Found	High	High	24
FALSE	High	TIQFVDWCPTGFKVGINYQPPTVVPGGDLAK	K		1xCarbamidomethyl [C8]	3	10	1	F1RK98; Q2HJB8; F1MNF8	1	3404.73	0				No Quan Values	Not Found	High	Not Found	High	39
FALSE	High	TIQGLEIELQSQLSMK	K		1xOxidation [M15]	1	1	1	sp	0	1833.96	0	434150				High	Not Found	Not Found	High	57	49.59
FALSE	High	TITLEVEPSDTIENVK	K			1	1	5	sp	0	1787.93	0	585210	487016			High	High	Not Found	High	54	38.72
FALSE	High	TKEEINELNR	R			1	6	1	sp	1	1245.64	0				No Quan Values	Not Found	Not Found	Not Found	High	33
FALSE	High	TKYEEEINKR	R			1	1	2	IPI00000004.1	2	1309.67	0	936081				High	Not Found	Not Found	High	42	15.06
FALSE	High	TKYEHELALR	R			1	1	10	IPI00000013.1	1	1259.67	0	1.50159e+06	4.05762e+06	1.00113e+06		High	High	High	High	52	21.44
FALSE	High	TKYETELNLR	R			1	1	5	IPI00000011.1	1	1266.67	0	1.50371e+06	2.59066e+06			High	High	Not Found	High	50	25.71
FALSE	High	TLDNDIMLIK	K		1xOxidation [M7]	1	1	1	sp	0	1191.63	0	4.79924e+06	2806621	4329953		High	Peak Found	Peak Found	High	28	36.36
FALSE	High	TLDNDIMLIK	K			1	1	1	sp	0	1175.63	0			791934		Not Found	Not Found	Peak Found	High	24	40.17
FALSE	High	TLEERDIK	K			1	1	1	IPI00000015.1	1	1003.54	0				No Quan Values	High	Not Found	Not Found	High	23	16.76
FALSE	High	TLEERLDK	K			1	1	1	sp	1	1003.54	1	2.67648e+06				High	Not Found	Not Found	High	23	16.76
FALSE	High	TLKLTTPTYGDLNHLVSATMSGVTTCLR	R		1xCarbamidomethyl [C26]	5	9	2	E1BJB1; F2Z5K5; Q767L7; F2Z571; F2Z5B2	1	3050.56	0		122308	256621	Shared	Not Found	Peak Found	High	High	46	55.28
FALSE	High	TLLDIDNTR	R			1	2	19	IPI00000010.1	0	1060.56	0	8.23319e+07	1.50792e+08	2.97424e+07		High	High	High	High	59	31.93
FALSE	High	TLLEGEESR	R			2	3	25	sp; IPI00000001.1	0	1033.52	0	110231376	138008560	4.45304e+07	Shared	High	High	High	High	59	20.75
FALSE	High	TLLISK	K			8	15	1	E1BJB1; F2Z5K5; F1S6M7; I3LBV1; Q2HJ81; Q767L7; F2Z571; F2Z5B2	0	674.445	0	110476	127437	604087	Shared	Peak Found	Peak Found	Peak Found	High	28	23.36
FALSE	High	TLNDMR	R		1xOxidation [M5]	1	2	5	IPI00000010.1	0	765.356	0	434421	944974	224673		High	Peak Found	Peak Found	High	25	14.11
FALSE	High	TLNDMR	R			1	2	24	IPI00000010.1	0	749.361	0	1.29426e+07	23070003	5.45712e+06		High	High	High	High	45	14.13
FALSE	High	TLNDMRQEYEQLIAK	K		1xOxidation [M5]	1	2	11	IPI00000010.1	1	1867.92	0	2.55787e+06	1.51644e+06	332028		High	High	High	High	47	33.54
FALSE	High	TLNDMRQEYEQLIAK	K			1	2	3	IPI00000010.1	1	1851.93	0					High	High	Not Found	High	47	41.32
FALSE	High	TLNNKFASFIDKVR	R			7	8	4	IPI00000006.1; IPI00000008.1; sp; IPI00000005.1; sp; IPI00000007.1; IPI00000002.1	2	1652.91	0	1.94027e+06	320256		Shared	High	High	Not Found	High	74	38.73
FALSE	High	TLSDYNIQK	K			1	1	4	sp	0	1081.55	0	558841	832517	296658		High	High	Peak Found	High	27	23.06
FALSE	High	TLYDAELSQMQSHISDTSVVLSMDNNR	R		1xOxidation [M23]	1	1	2	IPI00000006.1	0	3070.41	0				No Quan Values	Peak Found	Peak Found	Not Found	High	86	37.85
FALSE	High	TMQDSVEDFK	K		1xOxidation [M2]	1	1	2	IPI00000004.1	0	1215.52	0	1120441				High	Not Found	Not Found	High	40	21.96
FALSE	High	TMQNLEIELQSQLSMK	K		2xOxidation [M2; M15]	1	1	7	IPI00000011.1	0	1924.94	0	913767	1.30224e+06			High	High	Not Found	High	61	41.02
FALSE	High	TMSGVTTCLR	R		1xCarbamidomethyl [C8]; 1xOxidation [M2]	5	9	1	E1BJB1; F2Z5K5; Q767L7; F2Z571; F2Z5B2	0	1141.53	0				Shared	Not Found	Not Found	Not Found	High	29	19.42
FALSE	High	TMSGVTTCLR	R		1xCarbamidomethyl [C8]	5	9	5	E1BJB1; F2Z5K5; Q767L7; F2Z571; F2Z5B2	0	1125.54	0		292071	1.80367e+06	Shared	High	High	High	High	64	24.85
FALSE	High	TNAENEFVTIK	K			2	3	13	sp; IPI00000001.1	0	1265.64	0	1.11304e+08	1.65836e+08	2.72125e+07	Shared	High	High	High	High	81	30.81
FALSE	High	TNAENEFVTIKK	K			2	3	15	sp; IPI00000001.1	1	1393.73	0	34545202	36500086	8.89193e+06	Shared	High	High	High	High	67	25.19
FALSE	High	TQISETNVILSMDNNR	R		1xOxidation [M12]	2	3	1	sp; IPI00000001.1	0	1850.89	0				Shared	Not Found	Not Found	Not Found	High	95	31.63
FALSE	High	TRLEQEIATYR	R			3	3	13	IPI00000011.1; IPI00000013.1; IPI00000015.1	1	1379.73	0	1.16144e+07	10552981	4.85512e+06	Shared	High	High	High	High	69	29.79
FALSE	High	TSLLMER	R		1xOxidation [M5]	7	17	20	Q2HJB8; I3LDR2; P02550; A7E1S5; F1SHC1; F1MNF8; F2Z5S8	0	865.445	0	1.24668e+06	2.62413e+06	9.06177e+06	Shared	High	High	High	High	44	22.41
FALSE	High	TSLLMER	R			7	17	10	Q2HJB8; I3LDR2; P02550; A7E1S5; F1SHC1; F1MNF8; F2Z5S8	0	849.45	0	506285	4.50218e+06	3.20217e+07	Shared	High	High	High	High	47	26.3
FALSE	High	TSQNSELNNMQDLVEDYK	K		1xOxidation [M10]	2	2	4	IPI00000008.1; sp	0	2143.94	0	689086			Shared	High	Not Found	Not Found	High	77	31
FALSE	High	TSQNSELNNMQDLVEDYK	K			2	2	9	IPI00000008.1; sp	0	2127.95	0	1.61205e+06	1.32742e+06		Shared	High	High	High	High	148	42.81
FALSE	High	TSQNSELNNMQDLVEDYKK	K		1xOxidation [M10]	2	2	44	IPI00000008.1; sp	1	2272.04	0	4.72582e+06	4.25399e+06	514667	Shared	High	High	High	High	111	27.92
FALSE	High	TSQNSELNNMQDLVEDYKK	K			2	2	12	IPI00000008.1; sp	1	2256.04	0	1.4933e+07	1.27462e+07	6.45552e+06	Shared	High	High	High	High	116	39.38
FALSE	High	TTAIAEAWAR	R			7	15	18	F1RK98; Q2HJB8; I3LDR2; P02550; F1SHC1; F1MNF8; F2Z5S8	0	1089.57	0	1.66402e+07	3.68975e+07	102146784	Shared	High	High	High	High	65	31.36
FALSE	High	TTDNANILLQIDNAR	R			1	2	2	IPI00000012.1	0	1671.87	0					Not Found	Not Found	Not Found	High	92	40.55
FALSE	High	TTEIDNNIEQISSYK	K			1	2	1	IPI00000012.1	0	1754.84	0					Not Found	Not Found	Not Found	High	66	35.22
FALSE	High	TTLEHSDCAFMVDNEAIYDICR	R		2xCarbamidomethyl [C8; C21]; 1xOxidation [M11]	6	17	21	F1RK98; Q2HJB8; P02550; F1SHC1; F1MNF8; F2Z5S8	0	2676.14	0	4.26348e+06	9.06427e+06	2.72631e+07	Shared	High	High	High	High	114	40.7
FALSE	High	TTLEHSDCAFMVDNEAIYDICR	R		2xCarbamidomethyl [C8; C21]	6	17	4	F1RK98; Q2HJB8; P02550; F1SHC1; F1MNF8; F2Z5S8	0	2660.14	0			3.29388e+06	Shared	Not Found	High	High	High	129	42.85
FALSE	High	TTMPLW	W		1xOxidation [M3]	1	1	2	sp	0	764.365	0	634177	2.90196e+06			Peak Found	High	Not Found	High	22	36.65
FALSE	High	TVAAIFR	R			2	2	2	E1BJB1; F2Z5B2	0	777.462	0	160444		531595	Shared	Peak Found	Not Found	High	High	29	30.25
FALSE	High	TVATVFR	R			2	3	1	F1S6M7; I3LBV1	0	793.457	0	203824	191260	488820	Shared	Peak Found	Peak Found	High	High	29	24.65
FALSE	High	TVDNANVLLQIDNAR	R			1	1	1	IPI00000011.1	0	1655.87	0					Not Found	Not Found	Not Found	High	93	39.46
FALSE	High	TVNQSLLTPLNLQIDPTIQR	R			1	1	1	IPI00000005.1	0	2264.26	0					Not Found	Not Found	Not Found	High	39	49.75
FALSE	High	TVPELTQQMFDSK	K		1xOxidation [M9]	2	2	1	E1BJB1; F2Z5B2	0	1539.74	0				No Quan Values	Not Found	Not Found	Not Found	High	56
FALSE	High	TVSLPR	R			1	1	21	sp	0	672.404	0	4.638e+06	3.21536e+06	4.17751e+06		High	High	High	High	39	25.54
FALSE	High	TYAPVISAEK	K			5	14	5	F1RK98; P02550; F1SHC1; F1MNF8; F2Z5S8	0	1078.58	0		440779	962247	Shared	Not Found	High	High	High	45	24.88
FALSE	High	TYETTLEK	K			1	1	4	sp	0	984.488	0					High	High	Not Found	High	42	18.82
FALSE	High	TYFPHFDLSHGSAQVK	K			1	1	5	sp	0	1833.89	0	181866	6.44334e+06			High	High	Not Found	High	35	36.23
FALSE	High	VADALTNAVAHVDDMPNALSALSDLHAHK	K		1xOxidation [M15]	1	1	3	sp	0	3012.48	0	176816	3027277			Peak Found	High	Not Found	High	53	45.47
FALSE	High	VAGGGGGFGAAGGFGGR	R			2	2	7	IPI00000008.1; sp	0	1351.65	0	910613	1.29095e+06	241785	Shared	High	High	Peak Found	High	100	28.76
FALSE	High	VAPGKDLTK	K			1	2	4	IPI00000010.1	1	928.546	0					Not Found	Not Found	Not Found	High	48	12.47
FALSE	High	VATVFR	R			2	3	1	F1S6M7; I3LBV1	0	692.409	0				Shared	Not Found	Not Found	Not Found	High	26	20.55
FALSE	High	VATVSLPR	R			1	1	321	sp	0	842.509	0	1.28961e+09	1.16896e+09	1.3605e+09		High	High	High	High	56	25.51
FALSE	High	VAVCDIPPR	R	1	1xCarbamidomethyl [C4]	4	6	221	A5GFX6; F1S6M7; Q2HJ81; E1BJK2	0	1026.54	0	1.20132e+08	1.17103e+08	2.57599e+08	Shared	High	High	High	High	72	23.15
FALSE	High	VCNYVNWIQQTIAAN	N		1xCarbamidomethyl [C2]	1	1	4	sp	0	1793.86	0	1949708	958403	1.68654e+06		Peak Found	High	High	High	49	53.69
FALSE	High	VDLEPTVIDEIR	R			1	1	1	F2Z5S8	0	1398.75	0				No Quan Values	Not Found	Not Found	Not Found	High	115
FALSE	High	VDLEPTVIDEVR	R			4	12	4	P02550; A7E1S5; F1SHC1; F1MNF8	0	1384.73	0		611736	605142	Shared	Not Found	High	High	High	100	38.74
FALSE	High	VDLLNQEIEFLK	K			2	2	12	IPI00000008.1; sp	0	1460.8	0	4.62809e+07	27624536	11936782	Shared	High	High	High	High	112	50.17
FALSE	High	VDLQAK	K			2	3	34	sp; IPI00000001.1	0	673.388	0	39066888	58446298	15043154	Shared	High	High	High	High	31	13.09
FALSE	High	VDLTEFQTNLVPYPR	R			7	17	6	F1RK98; Q2HJB8; I3LDR2; P02550; F1SHC1; F1MNF8; F2Z5S8	0	1791.93	0	320954		2.34503e+06	Shared	High	High	High	High	121	46.76
FALSE	High	VDNANVLLQIDNAR	R			1	1	2	IPI00000011.1	0	1554.82	0					Not Found	Not Found	Not Found	High	105	38.71
FALSE	High	VDNEAIYDICR	R		1xCarbamidomethyl [C10]	7	18	2	F1RK98; Q2HJB8; I3LDR2; P02550; F1SHC1; F1MNF8; F2Z5S8	0	1367.63	0				No Quan Values	Not Found	Not Found	Not Found	High	41
FALSE	High	VDPEIQNVK	K			2	2	10	IPI00000008.1; sp	0	1041.56	0	58080240	5.13041e+07	1.86587e+07	Shared	High	High	High	High	51	20.71
FALSE	High	VDPVNFK	K			1	1	7	sp	0	818.441	0	522381	4.71519e+06	494942		Peak Found	High	High	High	40	24.49
FALSE	High	VDSLNDEINFLK	K			1	1	2	IPI00000004.1	0	1406.72	0	5.86365e+06				High	Not Found	High	High	62	43.33
FALSE	High	VDWCPTGFK	K		1xCarbamidomethyl [C4]	9	18	4	F1RK98; G5E6J5; Q2HJB8; I3LDR2; P02550; F1SHC1; F1MNF8; F1RYV9; F2Z5S8	0	1109.51	0		294753	640800	Shared	Not Found	High	High	High	51	35.36
FALSE	High	VDYGKK	K			6	17	4	F1RK98; P02550; A7E1S5; F1SHC1; F1MNF8; F2Z5S8	1	709.388	0	747034	2497269	1.99604e+06	Shared	High	High	Peak Found	High	22	16.82
FALSE	High	VEIDPEIQK	K			3	4	5	sp; IPI00000001.1; IPI00000004.1	0	1070.57	0	1.41027e+06	874121		Shared	High	High	Not Found	High	52	26.14
FALSE	High	VELEAALQQAK	K			1	1	1	IPI00000004.1	0	1199.66	0	1.09412e+06				High	Not Found	Not Found	High	52	31.97
FALSE	High	VELEAK	K			1	2	13	IPI00000004.1	0	688.388	0	4.32104e+06	3856141	1.48961e+06		High	High	High	High	40	14.14
FALSE	High	VELQAK	K			3	3	13	IPI00000006.1; IPI00000005.1; IPI00000007.1	0	687.404	0	1.87554e+06	3.52175e+06	505974	Shared	High	High	High	High	43	12.84
FALSE	High	VELQSK	K			2	2	12	IPI00000008.1; sp	0	703.398	0	3458085	2.29497e+06	1.49798e+06	Shared	High	Peak Found	Peak Found	High	31	10.58
FALSE	High	VELQSKVDLLNQEIEFLK	K			2	2	1	IPI00000008.1; sp	1	2145.18	0	114543			Shared	Peak Found	Not Found	Not Found	High	62	49.55
FALSE	High	VEWIPNNVK	K			9	12	5	E1BJB1; F2Z5K5; F1S6M7; I3LBV1; Q2HJ81; E1BJK2; Q767L7; F2Z571; F2Z5B2	0	1098.59	0	981499	968582	4.83685e+06	Shared	High	High	High	High	26	33.08
FALSE	High	VFDEFKPLVEEPQNLIK	K			1	1	1	sp	0	2045.1	0	330334				Peak Found	Not Found	Not Found	High	23	47.2
FALSE	High	VFGQSGAGNNWAK	K			5	9	4	E1BJB1; F2Z5K5; Q767L7; F2Z571; F2Z5B2	0	1335.64	0	3.87335e+06	5.88733e+06	11603486	Shared	Peak Found	High	High	High	90	27.41
FALSE	High	VFHSFGGGTGSGFTSLLMER	R		1xOxidation [M18]	5	12	4	P02550; A7E1S5; F1SHC1; F1MNF8; F2Z5S8	0	2103	0	268303		1.48274e+06	Shared	High	High	High	High	63	43.48
FALSE	High	VFHSFGGGTGSGFTSLLMER	R			5	12	1	P02550; A7E1S5; F1SHC1; F1MNF8; F2Z5S8	0	2087	0				Shared	Not Found	Not Found	Not Found	High	53	46.27
FALSE	High	VGAHAGEYGAEALER	R			1	1	10	sp	0	1529.73	0	737202	8743984	464718		High	High	High	High	68	24.03
FALSE	High	VGDSDLQLER	R			1	2	1	F1S6M7	0	1131.56	0				No Quan Values	Not Found	Not Found	High	High	36
FALSE	High	VGEGMEEGEFSEAR	R		1xOxidation [M5]	7	16	9	F1RK98; Q2HJB8; I3LDR2; P02550; F1SHC1; F1MNF8; F2Z5S8	0	1542.64	0	289796	564299	1.81716e+06	Shared	High	High	High	High	99	22.48
FALSE	High	VGEGMEEGEFSEAR	R			7	16	4	F1RK98; Q2HJB8; I3LDR2; P02550; F1SHC1; F1MNF8; F2Z5S8	0	1526.64	0	263830	1.39239e+06	14315798	Shared	Peak Found	High	High	High	94	27.63
FALSE	High	VGGVGVPAAPSITAVTVNK	K			1	1	1	sp	0	1736.99	0				No Quan Values	Not Found	Not Found	Not Found	High	14
FALSE	High	VGINYEPPTVVPGGDLAK	K			1	1	21	P02550	0	1825.97	0	1.58229e+06	4477204	8886485		High	High	High	High	46	39.31
FALSE	High	VGINYEPPTVVPGGDLAKVQR	R			1	1	3	P02550	1	2209.2	0				Not Reliable	Not Found	High	High	High	50
FALSE	High	VGINYQPPTVVPGGDLAK	K			5	13	77	F1RK98; Q2HJB8; F1SHC1; F1MNF8; F2Z5S8	0	1824.99	0	4.04419e+08	6.50945e+08	8.33942e+08	Shared	High	High	High	High	56	38.29
FALSE	High	VGINYQPPTVVPGGDLAKVERA	A			1	1	8	F1MNF8	2	2280.23	0	2.03093e+06	6.79568e+06	10153835		Peak Found	High	High	High	59	39.47
FALSE	High	VGINYQPPTVVPGGDLAKVQR	R			4	12	4	F1RK98; Q2HJB8; F1SHC1; F2Z5S8	1	2208.21	0	414791	1.46732e+06	2.3747e+06	Shared	High	Peak Found	Peak Found	High	66	37.67
FALSE	High	VGQAGVQIGNACWELYCLEHGIQPDGQMPSDK	K		2xCarbamidomethyl [C12; C17]; 1xOxidation [M28]	5	14	5	F1RK98; P02550; A7E1S5; F1SHC1; F1MNF8	0	3573.62	0	1.0578e+06	3.29126e+06	6695450	Shared	High	Peak Found	High	High	52	48.03
FALSE	High	VGTRPINLEPIFQGYIDSLK	K			2	2	6	IPI00000008.1; sp	0	2260.23	0	445472	317235	273127	Shared	High	High	High	High	57	55.14
FALSE	High	VGTRPINLEPIFQGYIDSLKR	R			2	2	7	IPI00000008.1; sp	1	2416.33	0	367299	159296	272513	Shared	High	Peak Found	High	High	63	52.89
FALSE	High	VHLTPEEK	K			1	1	3	sp	0	952.51	0	180033	3.26337e+06			Peak Found	High	Not Found	High	25	14.99
FALSE	High	VHWYVGEGMEEGEFSEAR	R		1xOxidation [M9]	7	16	4	F1RK98; Q2HJB8; I3LDR2; P02550; F1SHC1; F1MNF8; F2Z5S8	0	2127.91	0	303055	635256	910468	Shared	Peak Found	Peak Found	High	High	83	34.86
FALSE	High	VHWYVGEGMEEGEFSEAR	R			7	16	3	F1RK98; Q2HJB8; I3LDR2; P02550; F1SHC1; F1MNF8; F2Z5S8	0	2111.91	0		156724	2.14777e+06	Shared	Not Found	Peak Found	High	High	71	39.16
FALSE	High	VIDEVR	R			4	12	8	P02550; A7E1S5; F1SHC1; F1MNF8	0	730.409	0	452405	1.03833e+06	4.47213e+06	Shared	Peak Found	High	High	High	42	15.12
FALSE	High	VILEIDNAR	R			1	1	7	sp	0	1042.59	0	1.44289e+07		1841547		High	Not Found	High	High	58	30.79
FALSE	High	VILSMDNNR	R		1xOxidation [M5]	2	3	2	sp; IPI00000001.1	0	1077.54	0	184818	193719		Shared	High	Peak Found	Not Found	High	38	17.22
FALSE	High	VILSMDNNR	R			2	3	1	sp; IPI00000001.1	0	1061.54	0				No Quan Values	Not Found	Not Found	Not Found	High	35
FALSE	High	VIPYVR	R			1	1	3	sp	0	746.456	0				No Quan Values	High	Not Found	Not Found	High	26
FALSE	High	VKEAMAPK	K			1	1	2	sp	1	873.486	0		527237			Not Found	High	Not Found	High	28	10.29
FALSE	High	VKVDPEIQNVK	K			2	2	3	IPI00000008.1; sp	1	1268.72	0	412183	60603.7		Shared	High	Peak Found	Not Found	High	34	23.2
FALSE	High	VLDAVR	R			2	2	1	A5GFX6; E1BJK2	0	672.404	0	206321		187086	Shared	Peak Found	Not Found	Peak Found	High	29	16.85
FALSE	High	VLDELTLAR	R			2	2	12	IPI00000011.1; IPI00000013.1	0	1029.59	0	9.65953e+06	2.23079e+07	3.18293e+06	Shared	High	High	High	High	46	35.03
FALSE	High	VLDELTLTK	K			2	3	25	IPI00000012.1; sp	0	1031.6	0	1.09595e+08	7.6553e+07	33257785	Shared	High	High	High	High	55	33.49
FALSE	High	VLDELTLTKADLEMQIESLTEELAYLKK	K		1xOxidation [M14]	1	2	2	IPI00000012.1	2	3252.72	0				No Quan Values	High	Not Found	Not Found	High	56
FALSE	High	VLEGNEQFINAAK	K			1	1	2	sp	0	1432.74	0	198264	206631			High	High	Not Found	High	42	30.64
FALSE	High	VLGAFSDGLAHLDNLK	K			1	1	1	sp	0	1669.89	0		4326141			Not Found	High	Not Found	High	46	43.9
FALSE	High	VLLQIDNAR	R			1	1	1	IPI00000011.1	0	1041.61	0				No Quan Values	Not Found	Not Found	Not Found	High	52
FALSE	High	VLPVPQK	K			1	1	14	sp	0	780.498	0	3.18708e+06	3.59875e+07			High	High	Not Found	High	35	20.24
FALSE	High	VLQGLEIELQSQLSMK	K		1xOxidation [M15]	1	1	2	IPI00000013.1	0	1831.98	0	69110.5	211832			Peak Found	Peak Found	Not Found	High	40	46.65
FALSE	High	VLSGLSR	R			1	1	2	sp	0	731.441	0					Not Found	Not Found	Not Found	High	18	16.81
FALSE	High	VLSPADK	K			1	1	6	sp	0	729.414	0	212507	4.84794e+06			High	High	Not Found	High	42	12.53
FALSE	High	VLSPADKTNVK	K			1	1	3	sp	1	1171.67	0					Not Found	High	Not Found	High	42	15.75
FALSE	High	VLYDAEISQIH	H			2	2	1	IPI00000008.1; sp	0	1287.66	0				Shared	Not Found	Not Found	Not Found	High	44	34.83
FALSE	High	VLYDAEISQIHQ	Q			2	2	3	IPI00000008.1; sp	0	1415.72	0	238951			Shared	High	Not Found	Not Found	High	60	34.2
FALSE	High	VLYDAEISQIHQSVTDTNVILSMDNSR	R		1xOxidation [M23]	2	2	20	IPI00000008.1; sp	0	3064.49	0	1.38872e+07	10948043	3.22948e+06	Shared	High	High	High	High	90	45.48
FALSE	High	VLYDAEISQIHQSVTDTNVILSMDNSR	R			2	2	2	IPI00000008.1; sp	0	3048.49	0				Shared	Not Found	Not Found	Not Found	High	94	48.59
FALSE	High	VLYDAELSQMQTHVSDTSVVLSMDNNR	R		2xOxidation [M10; M23]	1	1	1	IPI00000004.1	0	3084.42	0	516707				High	Not Found	Not Found	High	74	36.21
FALSE	High	VMPSPK	K			5	10	1	E1BJB1; I3LBV1; Q2HJ81; E1BJK2; F2Z5B2	0	658.359	0	19313.6	52205.8	272950	Shared	Peak Found	Peak Found	High	High	17	12.41
FALSE	High	VNAAIATIK	K			4	11	6	F1RK98; P02550; F1SHC1; F1MNF8	0	900.551	0	170736	402304	1.01148e+06	Shared	Peak Found	High	Peak Found	High	59	24.38
FALSE	High	VNELSK	K			1	1	6	sp	0	689.383	0	23589	1.48677e+06			Peak Found	High	Not Found	High	48	9.79
FALSE	High	VNLGGSK	K			2	3	12	sp; IPI00000001.1	0	674.383	0	459367	592523	192999	Shared	High	High	Peak Found	High	50	11.22
FALSE	High	VNVDEVGGEALGR	R			1	1	6	sp	0	1314.66	0	1.29005e+06	11049115	827547		High	High	Peak Found	High	68	30.4
FALSE	High	VNWIQQTIAAN	N			1	1	3	sp	0	1257.66	0	1.9952e+06	1.39385e+06			Peak Found	Peak Found	Not Found	High	29	43.44
FALSE	High	VPGGDLAK	K			6	14	2	F1RK98; Q2HJB8; P02550; F1SHC1; F1MNF8; F2Z5S8	0	756.425	0				No Quan Values	Not Found	Not Found	Not Found	High	48
FALSE	High	VPQVSTPTLVEVSR	R			2	2	4	sp; sp	0	1511.84	0	397394	337426		Shared	High	High	Not Found	High	78	35.52
FALSE	High	VQALEEANNDLENK	K			1	2	18	IPI00000010.1	0	1586.77	0	5.41048e+07	6.77838e+07	1.80869e+07		High	High	High	High	84	27.73
FALSE	High	VQALEEANNDLENKIQDWYDK	K			1	2	4	IPI00000010.1	1	2535.2	0	341081	1.05667e+06			High	High	Not Found	High	74	45.33
FALSE	High	VQALEEANNDLENKIQDWYDKK	K			1	2	2	IPI00000010.1	2	2663.29	0	368353	1.51059e+06			High	High	Not Found	High	61	44.29
FALSE	High	VQFLEQQNK	K			1	1	4	IPI00000004.1	0	1133.59	0	5989658	1.4327e+06	930916		High	High	High	High	30	24.81
FALSE	High	VQQLQISVDQHGDNLK	K			1	1	4	IPI00000004.1	0	1821.95	0	6.58481e+06		205339		High	Not Found	High	High	52	29.81
FALSE	High	VREEYPDR	R			1	2	39	F1S6M7	1	1063.52	0	1.119e+08	1.13379e+08	1.56198e+08		High	High	High	High	47	12.7
FALSE	High	VSDTVVEPYNATLSIH	H			1	2	5	F1S6M7	0	1744.88	0	4586856	3.12792e+06	12514167		High	High	High	High	39	37.62
FALSE	High	VSDTVVEPYNATLSIHQLVENTDETYCIDNEALYDICFR	R		2xCarbamidomethyl [C27; C37]	1	2	5	F1S6M7	0	4607.12	0			4.57159e+06		High	High	High	High	63	58.46
FALSE	High	VSDTVVEPYNATLSVH	H			7	12	16	E1BJB1; F2Z5K5; I3LBV1; Q2HJ81; Q767L7; F2Z571; F2Z5B2	0	1730.86	0	1.68029e+07	1.89135e+07	59226082	Shared	High	High	High	High	56	35.28
FALSE	High	VSDTVVEPYNATLSVHQ	Q			7	12	3	E1BJB1; F2Z5K5; I3LBV1; Q2HJ81; Q767L7; F2Z571; F2Z5B2	0	1858.92	0	135024	175815	414611	Shared	Peak Found	Peak Found	High	High	49	34.81
FALSE	High	VSDTVVEPYNATLSVHQLVENTDETYCIDNEALYDICFR	R		2xCarbamidomethyl [C27; C37]	6	10	10	F2Z5K5; I3LBV1; Q2HJ81; Q767L7; F2Z571; F2Z5B2	0	4593.11	0	3.26618e+06	4.87374e+06	5498056	Shared	High	High	High	High	66	56.84
FALSE	High	VSDTVVEPYNATLSVHQLVENTDETYSIDNEALYDICFR	R		1xCarbamidomethyl [C37]	1	2	28	E1BJB1	0	4520.11	0	5.77802e+06	1.07723e+07	1.848e+07		High	High	High	High	79	56.63
FALSE	High	VSLTMSGVTTSLR	R		1xOxidation [M5]	1	1	1	A5GFX6	0	1367.72	0			173997		Not Found	Not Found	High	High	16	53.59
FALSE	High	VSTAVVEPYNSILTTHTTLEHSDCAFMVDNEAIYDICR	R		2xCarbamidomethyl [C24; C37]; 1xOxidation [M27]	6	17	1	F1RK98; Q2HJB8; P02550; F1SHC1; F1MNF8; F2Z5S8	0	4388.02	0		48382	994376	Shared	Not Found	Peak Found	High	High	47	48.97
FALSE	High	VSTGDVNVEMNAAPGVDLTQLLNNMR	R		2xOxidation [M10; M25]	1	2	1	IPI00000012.1	0	2790.34	0					Not Found	Not Found	Not Found	High	35	46.26
FALSE	High	VSTSHTTISGGGSR	R			2	3	10	sp; IPI00000001.1	0	1346.67	0	106335	410624		Shared	High	High	Not Found	High	64	11.86
FALSE	High	VSVSVSTSHTTISGGGSR	R			2	3	10	sp; IPI00000001.1	0	1718.87	0	832946	1.05077e+06	624219	Shared	High	High	High	High	84	22.64
FALSE	High	VTDLTK	K			2	2	1	sp; sp	0	676.388	0	429773	622459	130577	Shared	Peak Found	Peak Found	Peak Found	High	22	11.65
FALSE	High	VTINQSLLQPLNVEIDPEIQK	K			2	3	1	sp; IPI00000001.1	0	2391.31	0				No Quan Values	Not Found	Not Found	Not Found	High	39
FALSE	High	VTMQNLNDR	R		1xOxidation [M3]	3	4	74	IPI00000012.1; IPI00000011.1; IPI00000013.1	0	1106.53	0	1.51262e+07	1.10099e+07	3.08548e+06	Shared	High	High	High	High	92	12.65
FALSE	High	VTMQNLNDR	R			3	4	14	IPI00000012.1; IPI00000011.1; IPI00000013.1	0	1090.53	0	3.28915e+07	4.99523e+07	2.76312e+07	Shared	High	High	High	High	64	20.77
FALSE	High	VTMQNLNDRLASYLDKVR	R		1xOxidation [M3]	3	4	5	IPI00000012.1; IPI00000011.1; IPI00000013.1	2	2152.12	0	3.02746e+06	327122		Shared	High	Peak Found	Not Found	High	58	40.58
FALSE	High	VTMQNLNDRLASYLDKVR	R			3	4	1	IPI00000012.1; IPI00000011.1; IPI00000013.1	2	2136.12	0				Shared	Not Found	Not Found	Not Found	High	43	45.2
FALSE	High	VTQKSYK	K			1	1	1	IPI00000002.1	1	853.478	0	1.96155e+06	791472			Peak Found	Peak Found	Not Found	High	15	25.01
FALSE	High	VTSSTISSNVASK	K			2	2	5	IPI00000008.1; sp	0	1280.67	0				Shared	High	High	Not Found	High	63	18.22
FALSE	High	VVAGVANALAHK	K			1	1	10	sp	0	1149.67	0	824045	1.16485e+07	437997		High	High	High	High	81	24.8
FALSE	High	VVSAAHCYK	K		1xCarbamidomethyl [C7]	1	2	1	sp	0	1034.51	0				No Quan Values	Not Found	Not Found	High	High	28
FALSE	High	VVSTHEQVLR	R			1	1	5	IPI00000011.1	0	1167.65	0	202180	1.0564e+06	206616		Peak Found	High	Peak Found	High	64	17.77
FALSE	High	VXLSNTTAIAEAWAR	R			1	1	1	I3LDR2	0	1633.84	0				No Quan Values	Not Found	Not Found	High	High	41
FALSE	High	VYYNEAAGNK	K			1	3	3	E1BJB1	0	1128.53	0	4.67744e+06	7104085	2.62658e+06		Peak Found	High	High	High	37	15.94
FALSE	High	VYYNEATGGK	K			2	2	2	Q767L7; F2Z571	0	1101.52	0			311926	Shared	High	Not Found	High	High	30	16.47
FALSE	High	VYYNEATGNK	K			1	3	3	F2Z5B2	0	1158.54	0				No Quan Values	Not Found	High	High	High	51
FALSE	High	VYYNEATGNKYVPRAILVDLEPGTMDSVR	R			1	3	1	F2Z5B2	2	3270.65	0				No Quan Values	Not Found	Not Found	Not Found	High	33
FALSE	High	WELLQQMNVGTR	R		1xOxidation [M7]	2	2	6	IPI00000008.1; sp	0	1490.74	0	1.32809e+06	604824	265675	Shared	High	High	High	High	59	36.4
FALSE	High	WELLQQMNVGTRPINLEPIFQGYIDSLK	K		1xOxidation [M7]	2	2	4	IPI00000008.1; sp	0	3318.72	0				No Quan Values	High	High	Not Found	High	41
FALSE	High	WELLQQMNVGTRPINLEPIFQGYIDSLKR	R		1xOxidation [M7]	2	2	2	IPI00000008.1; sp	1	3474.82	0	390297			Shared	Peak Found	Not Found	Not Found	High	54	57.81
FALSE	High	WELLQQVDTSTR	R			2	3	34	sp; IPI00000001.1	0	1475.75	0	6.73459e+07	78964815	17849896	Shared	High	High	High	High	85	40.5
FALSE	High	WIQQTIAAN	N			1	1	3	sp	0	1044.55	0	662958		1.36902e+06		Peak Found	High	High	High	25	31.09
FALSE	High	WNLLQQQTTTTSSK	K			1	1	1	IPI00000004.1	0	1635.83	0	3.67024e+06				High	Not Found	Not Found	High	74	34.6
FALSE	High	WTLLQEQGTK	K			1	1	15	IPI00000005.1	0	1203.64	2	12385210	1.84481e+07	4.41458e+06		High	High	High	High	68	34.15
FALSE	High	WTLLQEQKSA	A			0	1	12		1	1203.64	0				No Quan Values	High	High	High	High	68	34.15
FALSE	High	WYVGEGMEEGEFSEAR	R		1xOxidation [M7]	7	16	23	F1RK98; Q2HJB8; I3LDR2; P02550; F1SHC1; F1MNF8; F2Z5S8	0	1891.78	0	1.66009e+06	3.62169e+06	5.87619e+06	Shared	High	High	High	High	115	35.44
FALSE	High	WYVGEGMEEGEFSEAR	R			7	16	3	F1RK98; Q2HJB8; I3LDR2; P02550; F1SHC1; F1MNF8; F2Z5S8	0	1875.79	0	79764.5	803536	7014532	Shared	Peak Found	High	High	High	89	40.89
FALSE	High	YAPVISAEK	K			5	14	13	F1RK98; P02550; F1SHC1; F1MNF8; F2Z5S8	0	977.53	0	5.88114e+06	1.5418e+07	5.07283e+07	Shared	High	High	High	High	53	22.62
FALSE	High	YAVSVLLR	R			1	1	1	sp	0	920.556	0	211830				High	Not Found	Not Found	High	58	37.23
FALSE	High	YCGQLQMIQEQISNLEAQITDVR	R		1xCarbamidomethyl [C2]; 1xOxidation [M7]	1	2	7	IPI00000010.1	0	2753.32	0			905303		High	High	High	High	140	58.36
FALSE	High	YCVQLSQIQ	Q		1xCarbamidomethyl [C2]	1	2	1	IPI00000012.1	0	1138.56	0					Not Found	Not Found	Not Found	High	24	34.81
FALSE	High	YCVQLSQIQAQISALEEQLQQIR	R		1xCarbamidomethyl [C2]	1	2	7	IPI00000012.1	0	2746.42	0				No Quan Values	High	High	High	High	146
FALSE	High	YEDEINK	K			8	9	10	IPI00000006.1; sp; IPI00000008.1; IPI00000001.1; IPI00000005.1; sp; IPI00000007.1; IPI00000002.1	0	910.415	0	2.94084e+06	4.76422e+06	321779	Shared	High	High	Peak Found	High	41	14.33
FALSE	High	YEDEINKR	R			8	9	18	IPI00000006.1; sp; IPI00000008.1; IPI00000001.1; IPI00000005.1; sp; IPI00000007.1; IPI00000002.1	1	1066.52	0	1.17036e+07	1.93817e+07	3.85173e+06	Shared	High	High	High	High	56	13.22
FALSE	High	YEDIAQK	K			2	2	4	sp; IPI00000001.1	0	866.425	0	106616	116879	62011.9	Shared	High	Peak Found	Peak Found	High	39	14.31
FALSE	High	YEEIAQR	R			5	5	3	IPI00000008.1; IPI00000005.1; sp; IPI00000007.1; IPI00000004.1	0	908.447	0	73957.3	59483.1	44335.5	Shared	High	Peak Found	Peak Found	High	34	15.4
FALSE	High	YEELQIT	T			2	3	3	sp; IPI00000001.1	0	895.441	0	259486	342062		Shared	High	High	Not Found	High	30	32.59
FALSE	High	YEELQITAGR	R			2	3	50	sp; IPI00000001.1	0	1179.6	0	8.51978e+07	1.01525e+08	3.19378e+07	Shared	High	High	High	High	69	29.06
FALSE	High	YEELQVTAGR	R			1	1	7	IPI00000005.1	0	1165.58	1	3.45475e+06	4580190			High	High	High	High	71	25.02
FALSE	High	YEELQVTVGR	R			2	2	23	IPI00000008.1; sp	0	1193.62	0	2.15593e+07	1.40747e+07	3.96672e+06	Shared	High	High	High	High	85	30.08
FALSE	High	YEHELALR	R			1	1	1	IPI00000013.1	0	1030.53	0		1.1796e+06			Not Found	High	Not Found	High	16	22.19
FALSE	High	YENELALR	R			1	1	4	IPI00000014.1	0	1007.52	0	3.32775e+06		524978		High	Not Found	High	High	49	26.69
FALSE	High	YENEVALR	R			1	2	12	IPI00000012.1	0	993.5	0	22913602	2.80594e+07	1.12209e+07		High	High	High	High	55	21.91
FALSE	High	YETELNLR	R			1	1	6	IPI00000011.1	0	1037.53	0		1.73624e+06	160121		High	High	Peak Found	High	46	28.73
FALSE	High	YGDLNHLVSATMSGVTTCLR	R		1xCarbamidomethyl [C18]	5	9	1	E1BJB1; F2Z5K5; Q767L7; F2Z571; F2Z5B2	0	2195.06	0	65307.4	42988.8	412160	Shared	Peak Found	Peak Found	High	High	66	49.39
FALSE	High	YGDLNHLVSATMSGVTTSLR	R		1xOxidation [M12]	3	5	2	F1S6M7; I3LBV1; Q2HJ81	0	2138.05	0				No Quan Values	High	Not Found	Not Found	High	60
FALSE	High	YGDLNHLVSATMSGVTTSLR	R			3	5	1	F1S6M7; I3LBV1; Q2HJ81	0	2122.06	0			583108	Shared	Not Found	Not Found	High	High	65	49.98
FALSE	High	YIPIQYVLSR	R			1	1	8	sp	0	1251.71	0	2408973	5.39611e+06			High	High	Not Found	High	43	44.92
FALSE	High	YLDGLTAER	R			2	2	9	IPI00000008.1; sp	0	1037.53	1	3.83456e+07	30914520	1.21056e+07	Shared	High	High	High	High	56	28.73
FALSE	High	YLGYLEQLLR	R			1	1	7	sp	0	1267.7	0	1.41535e+06	9596729	609105		High	High	High	High	75	51.79
FALSE	High	YLTVAAIFR	R			2	2	102	E1BJB1; F2Z5B2	0	1053.61	0	1.88771e+08	2.68019e+08	3.77707e+08	Shared	High	High	High	High	65	46.7
FALSE	High	YLTVAAIFRGR	R			2	2	1	E1BJB1; F2Z5B2	1	1266.73	0				Shared	Not Found	Not Found	Not Found	High	25	42.43
FALSE	High	YLTVAAVFR	R			4	6	32	F2Z5K5; Q2HJ81; Q767L7; F2Z571	0	1039.59	0	1.27691e+08	1.6823e+08	2.11846e+08	Shared	High	High	High	High	58	42.76
FALSE	High	YLTVACIFR	R		1xCarbamidomethyl [C6]	2	2	1	A5GFX6; E1BJK2	0	1142.6	0	121768			Shared	High	Not Found	Not Found	High	34	45.49
FALSE	High	YLTVATVFR	R			2	3	56	F1S6M7; I3LBV1	0	1069.6	0	3.24703e+08	3.0195e+08	4.90049e+08	Shared	High	High	High	High	65	41.29
FALSE	High	YLYEIAR	R			2	2	4	sp; sp	0	927.493	0	1.08399e+06			Shared	High	Not Found	Not Found	High	32	30.04
FALSE	High	YMACCL	L		2xCarbamidomethyl [C4; C5]	4	11	2	P02550; F1SHC1; F1MNF8; F2Z5S8	0	817.304	0		618928	4.80024e+06	Shared	Not Found	Peak Found	Peak Found	High	16	29.81
FALSE	High	YMACCLLYR	R		2xCarbamidomethyl [C4; C5]; 1xOxidation [M2]	4	11	122	P02550; F1SHC1; F1MNF8; F2Z5S8	0	1265.55	0	1.60425e+08	3.96728e+08	3.29123e+08	Shared	High	High	High	High	67	32.14
FALSE	High	YMACCLLYR	R		2xCarbamidomethyl [C4; C5]	4	11	21	P02550; F1SHC1; F1MNF8; F2Z5S8	0	1249.55	0	5.43032e+06	7.9093e+07	2.89191e+08	Shared	High	High	High	High	59	35.96
FALSE	High	YNLYGK	K			1	1	1	sp	0	757.388	0					Not Found	Not Found	Not Found	High	17	20.12
FALSE	High	YNTIDDLK	K			1	2	4	IPI00000010.1	0	981.489	0	1162066	816263			High	High	Not Found	High	48	24.78
FALSE	High	YNTIDDLKDQIVDLTVGNNK	K			1	2	8	IPI00000010.1	1	2278.16	0	1.4063e+06	2.11628e+06	428880		High	High	High	High	88	50.11
FALSE	High	YPSYGLNYYQQKPVALINNQFLPYPY	Y			1	1	1	sp	0	3153.57	0		180648			Not Found	High	Not Found	High	19	55.04
FALSE	High	YQAELSQMQTQISETNVILSMDNNR	R		2xOxidation [M8; M21]	2	3	2	sp; IPI00000001.1	0	2945.36	0				Shared	Not Found	Not Found	Not Found	High	63	37.46
FALSE	High	YQEPVLGPVR	R			1	1	1	sp	0	1157.63	0		196033			Not Found	High	Not Found	High	49	30.52
FALSE	High	YQEPVLGPVRGPFPIIV	V			1	1	1	sp	1	1881.06	0	48106.9	120388	158139		Peak Found	Peak Found	Peak Found	High	17	55.11
FALSE	High	YQPPTVVPGGDLAK	K			5	13	11	F1RK98; Q2HJB8; F1SHC1; F1MNF8; F2Z5S8	0	1441.77	0	1.02869e+06	3.58031e+06	7561626	Shared	Peak Found	High	High	High	54	32.54
FALSE	High	YTEGAELVDSVLDVVR	R			6	12	8	E1BJB1; F1S6M7; Q2HJ81; Q767L7; F2Z571; F2Z5B2	0	1764.9	0	408089	531389	2.60487e+06	Shared	High	Peak Found	High	High	122	55.85
FALSE	High	YVGDSDLQLER	R			1	2	7	F1S6M7	0	1294.63	0	1.73684e+06	1.02274e+06	2.94281e+06		High	High	Peak Found	High	104	29.23
FALSE	High	YVGEGMEEGEFSEAR	R			7	16	2	F1RK98; Q2HJB8; I3LDR2; P02550; F1SHC1; F1MNF8; F2Z5S8	0	1689.71	0			744228	Shared	Not Found	Not Found	High	High	97	31.73
FALSE	High	YVNWIQQTIAAN	N			1	1	6	sp	0	1420.72	0	2.0054e+06	1483215	3464886		High	High	High	High	46	47.44
FALSE	High	YYTVFDR	R			1	1	4	sp	0	963.457	0	170956	189039			High	High	Not Found	High	48	31.73
