# Supplementary material for: Regulation of microtubule dynamic instability by the carboxy-terminal tail of β-tubulin
Source: Life Sci Alliance. 2018 Apr 19;1(2):e201800054. doi: 10.26508/lsa.201800054 (PMC6022761; doi:10.26508/lsa.201800054)
Supplement: Supplementary file 3 [file LSA-2018-00054_SdataT1.xlsx]

## Sheet: Wt tub1-GFP
Poly Rates			Depoly Rates			Polymerization Duration			Depolymerization Duration			Catastrophe Frequency			Rescue Frequency
mean	1.79465		mean	2.96029		mean	41.9625		mean	25.468		mean	1.06127		mean	1.72993
SD	0.798641		SD	1.11256		SD	21.5085		SD	11.5352		SD	0.509429		SD	0.817942
Coefficient of variation	0.445011		Coefficient of variation	0.375829		Coefficient of variation	0.512566		Coefficient of variation	0.452929		Coefficient of variation	0.480016		Coefficient of variation	0.472818
n	110		n	101		n	112		n	103		n	36		n	35
values	1.55846		values	2.56		values	39		values	12		values	1.37931		values	2.43902
	4.61			2.298			12			30			1.02564			1.66667
	0.984615			3.60364			39			33			1.45455			1.5
	2.264			2.044			30			30			0.491803			1.08696
	2.945			1.96182			36			33			1.35593			0.952381
	1.38			3.96			30			12			1.63934			0.8
	1.25067			4.08889			45			27			2.10526			1.33333
	1.47882			2.745			51			12			0.740741			2.28571
	1.4225			2.86857			48			21			1.25			2.14286
	2.01			3.12667			42			27			1			1.875
	1.74167			6.075			36			12			0.338983			0.483871
	1.66667			1.34			63			36			0.6			0.555556
	2.02941			5.02909			51			33			1			1.57895
	1.83111			4.8875			27			24			2.72727			0.576923
	2.28571			4.06714			21			42			1.2			3
	3.065			3.14571			24			42			1.22449			2.14286
	2.17			2.23			66			24			1.25			0.775862
	2.36571			3.21			21			12			0.789474			1.40625
	2.42364			4.064			33			6			0.967742			1.36364
	2.30333			4.24			18			15			1.66667			0.789474
	2.3			2.496			21			9			0.238095			2.14286
	4.34			3.338			12			15			1.10294			0.584416
	2.35667			4.1325			18			30			1.875			0.737705
	1.91158			3.77			57			24			0.857143			1.8
	2.07			3.57556			60			18			0.56962			2.85714
	2.34857			5.57333			21			27			0.5			2.85714
	1.602			3.72			30			18			0.882353			2.44798
	1.30105			2.5075			57			18			1.125			3.32226
	2.85556			4.1375			27			24			1.01112			2.90698
	2.592			3.652			45			6			0.968992			1.66113
	2.60857			2.475			21			24			0.788333			1.29199
	2.34923			3.4125			39			15			1.29199			2.90698
	1.54222			2.27625			15			24			0.611995			1.83599
	1.5725			4.1775			54			32			0.415282			2.11416
	0.873333			2.736			48			32			0.930233			2.32558
	1.0635			0.951176			108			8			0.830565
	1.515			1.635			40			20
	1.8675			2.00625			20			68
	1.38955			2.448			24			40
	3.045			2.3075			44			16
	1.14176			2.652			12			40
	2.55643			1.56937			68			24
	1.48227			4.08			28			20
	1.91			2.13			44			32
	1.9975			3.85			48			8
	1.12031			2.955			8			20
	5.3025			1.705			24			12
	0.711429			2.64			64			28
	1.4525			2.529			8			36
	1.84714			2.245			56			28
	0.943333			2.875			48			20
	0.9585			3.085			28			36
	0.82125			1.7025			36			12
	1.002			1.47214			40			24
	1.405			1.27962			48			24
	0.75375			2.91			60			28
	2.52			2.40187			36			52
	2.28643			1.36167			48			12
	1.63125			2			12			32
	1.39833			2.09786			28			36
	2.2925			1.8625			32			24
	2.136			1.6325			36			28
	1.31167			1.593			24			24
	0.747143			3.519			20			24
	1.26333			2.69571			36			40
	1.533			2.48167			84			20
	1.16559			3.492			36			28
	0.881087			2.02333			40			36
	1.49464			4.5275			68			20
	1.07833			7.075			92			36
	2.6325			3.61125			56			24
	2.634			3.1425			72			12
	1.35136			4.365			16			16
	1.56409			2.505			20			16
	2.45625			2.0025			44			16
	1.57			4.35271			44			12
	1.34593			5.06589			16			24
	2.53295			4.89922			24			15.48
	1.3873			3.77907			41.28			15.48
	1.05717			3.5			30.96			15.48
	1.125			2.41163			67.08			15.48
	2.7907			3.23422			61.92			20.64
	2.78876			1.28682			41.28			25.8
	1.6657			2.22326			20.64			36.12
	1.29734			2.52326			30.96			30.96
	0.876321			1.06783			41.28			25.8
	3.1124			1.83555			36.12			30.96
	1.73754			3.43411			56.76			30.96
	0.858629			2.48173			15.48			36.12
	1.15988			2.79942			36.12			30.96
	1.86977			2.18314			98.04			36.12
	1.88517			2.22757			41.28			20.64
	0.890698			3.07364			25.8			20.64
	2.77519			2.47093			41.28			72.24
	1.07442			3.0515			51.6			30.96
	1.1113			2.93953			15.48			20.64
	1.64186			3.10465			77.4			36.12
	1.74709			2.80731			108.36			25.8
	3.11919			3.9186			25.8			15.48
	1.69873			3.30233			41.28			36.12
	1.34778			2.07326			20.64			20.64
	1.61919						56.76			30.96
	1.05556						56.76			51.6
	1.12126						82.56
	1.07074						46.44
	1.52035						72.24
	1.69703						61.92
	1.48062						41.28
	1.07881						92.88
	1.2282						77.4
							46.44
							41.28

## Sheet: Tub2-430d tub1-GFP
Poly Rates			Depoly Rates			Polymerization Duration			Depolymerization Duration			Catastrophe Frequency			Rescue Frequency
mean	1.90264		mean	2.78649		mean	49.1689		mean	38.4428		mean	0.770598		mean	1.13483
SD	1.09443		SD	1.30314		SD	28.4141		SD	20.584		SD	0.431655		SD	0.688779
Coefficient of variation	0.575219		Coefficient of variation	0.467666		Coefficient of variation	0.577888		Coefficient of variation	0.535445		Coefficient of variation	0.560156		Coefficient of variation	0.606945
n	140		n	123		n	140		n	123		n	44		n	42
values	1.40923		values	4.584		values	39		values	15		values	1.10092		values	1.875
	2.43333			5.02			27			6			2.06897			1.81818
	2.15			4.47143			36			21			0.535714			1.36364
	0.933333			3.76			45			27			0.821918			1.47368
	1.348			7.01			30			6			0.454545			0.493827
	3.62286			2.69467			21			45			0.963855			1.36364
	1.73294			1.70833			51			36			1.73913			0.775194
	1.54957			4.7			69			9			0.425532			1.81818
	2.30889			2.566			27			30			0.4			1.81818
	2.90857			4.17			21			54			1.23457			0.789474
	2.9			4.95867			18			45			0.373832			0.740741
	2.34444			2.57			27			18			0.714286			0.689655
	2.19789			3.4			57			12			0.606061			0.714286
	2.07111			2.05091			27			66			0.810811			2.25806
	2.145			3.52			36			33			0.961538			2.66667
	1.84121			3.80857			99			21			0.465116			1
	3.50667			3.48857			9			63			0.20202			0.833333
	1.48815			2.15684			81			57			2.22222			0.789474
	1.7184			2.14			75			45			0.714286			3
	1.84			3.00824			51			51			0.576923			0.882353
	2.2275			1.69167			48			36			0.394737			0.731707
	0.954667			2.22714			45			42			0.638298			2.30769
	5.43			3.768			12			15			0.230769			0.671642
	1.51231			4.04667			39			9			0.365854			1.13636
	2.40714			4.084			42			15			0.810811			0.625
	1.72526			2.60706			57			51			1.07143			0.451128
	2.79091			2.53091			33			33			0.783208			0.617983
	1.38571			2.77619			63			63			0.742597			0.773196
	1.57586			5.02			87			6			0.882353			1.33333
	1.88			3.108			54			15			0.5625			0.725806
	2.92909			1.87077			33			39			0.38961			0.740741
	2.06444			1.92727			27			33			0.914634			0.5
	2.02889			2.655			27			36			0.918367			0.319149
	6.12			2.08125			12			48			0.463918			0.344828
	3.20105			2.36286			57			21			1.07143			1.92678
	4.46			2.25556			9			54			0.963391			0.481696
	2.104			1.51667			15			36			0.398645			0.583374
	1.85333			2.2744			36			75			0.521467			2.28862
	0.996			5.57			105			18			0.483773			0.381437
	1.53833			3.982			36			30			0.661157			1.76177
	1.16476			2.075			63			36			1.23967			0.798669
	5.54			4.27333			12			9			0.453789			0.998336
	2.0675			2.48133			24			45			0.644088
	2.36			3.85143			15			21			0.907578
	2.21571			1.8			42			24
	1.35556			5.67333			27			9
	3.425			3.634			12			30
	1.4144			1.98625			75			48
	1.29909			4.132			66			30
	1.43412			3.2875			51			24
	2.01913			2.17333			69			18
	2.22545			1.86			33			54
	2.22375			2.16533			48			45
	2.00182			4.312			33			15
	4.175			1.6275			12			40
	2.232			2.87438			15			32
	3.76			3.02333			15			108
	1.26267			3.084			45			20
	1.67182			2.31955			66			44
	1.01385			3.32357			39			56
	1.30727			1.61885			33			52
	2.79273			1.75687			33			96
	1.34833			3.86885			36			52
	1.00533			3.1875			45			48
	1.24			3.46594			57			64
	0.943333			1.536			72			20
	0.646957			2.68625			69			48
	1.376			1.25438			30			32
	0.841429			2.1575			42			48
	1.3875			1.95333			40			36
	5.2725			2.37833			24			36
	7.255			4.4925			24			16
	1.0305			2.115			40			44
	3.00577			2.28214			104			28
	1.89643			2.34398			28			31.92
	1.1442			2.74185			100			23.94
	0.955833			1.44791			72			27.93
	1.14409			1.40017			132			35.91
	0.8595			2.44549			40			31.92
	1.04713			2.86402			188			27.93
	0.939167			1.60706			72			51.87
	1.0075			9.00075			48			11.97
	1.5			1.98537			44			67.83
	1.4625			2.85394			80			24
	1.193			1.23255			60			36
	1.746			2.31964			20			16
	3.225			1.49177			12			40
	2.06667			2.48568			36			44
	1.38			4.25883			52			8
	1.19182			2.75811			44			52
	1.13813			1.78374			64			72
	1.81091			2.891			44			56
	0.87218			1.37777			35.91			52
	1.11612			1.21082			35.91			80
	0.719925			2.89076			63.84			40
	1.88976			1.74071			23.94			36
	1.49691			1.6806			71.82			56
	1.1155			1.75356			95.76			28
	1.36221			0.861344			32			36
	1.02279			3.65415			52			36
	2.62978			3.46103			16			12
	2.46329			1.82193			32			80
	1.28106			1.20357			56			56
	0.920448			6.10183			72			16
	1.33429			3.22203			36			28
	1.00333			1.82549			156			40
	0.538864			1.57967			56			56
	0.939147			1.2227			92			52
	0.688992			1.1754			44			48
	0.757189			1.81541			56			28
	1.33081			2.10597			60			31.14
	3.13783			2.30058			20			31.14
	1.07473			2.18208			72			41.52
	1.35961			3.00191			48			15.69
	3.15293			2.63802			40			42.35
	2.29451			2.52521			44			48.4
	1.81243			1.17025			64			30.25
	0.974388			2.75702			48			48.4
	1.35698			2.0514			68			121
	0.910471			2.72637			88			66.11
	1.37139			1.66722			83.04			66.11
	1.25434			5.10899			41.52			24.04
	1.5851			1.1401			46.71			60.1
	1.17386						67.47
	1.51762						36.61
	1.55793						78.45
	1.44917						48.4
	1.99481						42.35
	1.59736						90.75
	2.97025						24.2
	1.95372						42.35
	1.26107						114.95
	3.4562						12.1
	1.79534						36.06
	1.95674						36.06
	1.89684						24.04
	1.69592						48.08
	1.65186						78.13
	1.49024						66.11
	1.52706						57.09

## Sheet: tub2-438 tub1-GFP
Poly Rates			Depoly Rates			Polymerization Duration			Depolymerization Duration			Catastrophe Frequency			Rescue Frequency
mean	1.98874		mean	2.90354		mean	40.8286		mean	27.9137		mean	1.14398		mean	1.17899
SD	1.23699		SD	1.21924		SD	22.8308		SD	14.2432		SD	0.739775		SD	0.750562
Coefficient of variation	0.622		Coefficient of variation	0.419916		Coefficient of variation	0.559186		Coefficient of variation	0.510258		Coefficient of variation	0.646669		Coefficient of variation	0.636612
n	71		n	75		n	71		n	75		n	24		n	24
values	0.979615		values	2.086		values	104		values	60		values	0.428571		values	1.07143
	0.969286			1.64375			84			48			0.9375			0.46875
	1.2			2.571			32			20			1.07143			1.5
	1.20167			2.571			72			20			1.5			0.241935
	2.6775			2.571			16			20			1.875			1.875
	1.77214			3.59143			28			28			0.789474			1.57895
	1.04769			1.75286			52			28			0.892857			0.967742
	1.16143			1.71			56			32			0.642857			0.616438
	1.845			1.94571			64			28			1.15385			3
	1.30313			2.755			32			48			1.36364			0.46875
	1.53656			4.47			64			8			1.02273			1.09756
	1.60833			2.085			36			36			0.555556			0.277778
	2.802			1.207			20			60			0.5			1.55172
	1.02675			3.40313			80			32			0.227273			0.803571
	0.89625			1.95			64			60			0.727273			2.22222
	1.1175			2.49875			40			48			2.66667			0.869565
	0.88875			2.0775			48			16			3.53826			0.959846
	1.22344			1.55438			64			32			0.857143			0.4
	2.25375			5			16			12			0.592105			1.39535
	0.950357			2.376			56			20			1.38462			1.13208
	2.615			2.3275			12			24			0.688073			0.454545
	1.608			1.266			20			40			0.9375			1.11111
	1.58885			1.55357			52			28			1.62162			1.29032
	1.74429			3.14438			28			32			1.48148			2.94118
	1.33636			1.1145			44			40
	5.865			3.774			12			20
	2.09167			1.443			36			40
	0.8025			2.13857			48			28
	1.186			1.98			60			40
	1.185			2.67			52			28
	0.742105			3.72			76			12
	2.16			3.145			20			24
	2.073			2.025			20			24
	1.92			2.03			16			36
	3.456			3.34929			15			28
	4.22			3.10875			9			16
	1.49714			7.585			63			12
	1.25455			4.904			33			15
	1.67067			1.98571			45			21
	6.99			1.638			6			30
	4.78667			3.29926			9			83.79
	2.62222			2.28893			27			31.92
	3.99333			2.69834			9			39.9
	3.18928			1.80797			23.94			31.92
	3.41808			3.73747			31.92			36
	3.572			5.17227			11.97			8
	1.47035			3.09827			72			48
	0.938669			1.14651			44			44
	1.9369			2.59429			24			32
	1.30964			4.00576			44			12
	1.09868			3.0999			100			36
	0.692311			2.37522			44			16
	2.54369			3.06352			12			12
	1.50146			1.97124			36			20
	1.61265			3.12501			56			20
	1.73575			2.34406			44			16
	1.70951			4.58188			32			16
	0.889943			3.64507			44			32
	0.919038			1.97449			56			24
	1.52158			4.19944			68			12
	1.4197			3.09715			68			12
	1.44625			2.65192			52			12
	1.3748			1.92682			52			16
	1.58333			3.77621			36			28
	2.78889			2.96676			27			32
	1.705			4.23778			60			20
	2.19667			1.86922			18			40
	2.5575			2.88308			48			39
	5.465			2.47778			12			27
	2.752			3.702			15			30
	1.98222			3.525			27			12
				4.18						9
				6.54286						21
				4.71143						21
				4.26667						9

## Sheet: tub2-polyQ tub1-GFP
Poly Rates			Depoly Rates			Polymerization Duration			Depolymerization Duration			Catastrophe Frequency			Rescue Frequency
mean	1.53086		mean	2.30456		mean	48.2042		mean	38.2731		mean	0.86577		mean	1.10503
SD	0.741752		SD	0.87634		SD	29.7314		SD	19.3721		SD	0.393579		SD	0.877659
Coefficient of variation	0.484533		Coefficient of variation	0.380263		Coefficient of variation	0.616779		Coefficient of variation	0.506155		Coefficient of variation	0.454601		Coefficient of variation	0.794239
n	130		n	124		n	132		n	127		n	43		n	47
values	3.22		values	1.07474		values	30		values	57		values	0.833333		values	0.275862
	1.34727			2.1275			66			24			0.892857			1.18812
	1.38308			1.63846			39			39			1.33333			1.53846
	1.34889			2.19143			27			42			1.0101			0.833333
	0.712632			5.30667			57			9			1.0101			0.689655
	1.88462			2.66167			6			36			0.465116			0.689655
	3.89333			1.94889			39			27			1.42857			0.97561
	1.3			1.78923			9			39			1.33333			5.71429
	1.51			3.27333			39			27			0.182927			2.5
	1.74667			3.784			48			15			1.46341			0.952381
	1.33333			0.9975			18			72			1.17647			1.53061
	1.20769			1.66444			45			27			0.803571			2.14286
	1.03538			2.28889			39			27			0.818182			2.5
	0.867			1.52			39			24			0.22985			0.434783
	1.20769			3.70667			60			18			0.857143			1.18421
	1.03538			1.66444			39			6			0.631579			1.13208
	0.867			2.28889			39			27			0.629063			1.55898
	1.93667			1.52			60			27			0.555916			1.05882
	4.06			3.70667			18			24			0.51966			0.585366
	2.8			3.438			18			18			0.833874			1.54222
	1.81714			2.97571			9			6			0.689549			0.271641
	3.35			3.386			24			30			0.810318			0.796813
	1.47714			2.37524			21			42			0.478088			1.54222
	2.17714			2.515			36			30			0.923077			1.32802
	1.24444			2.76267			42			63			0.166003			0.943594
	4.06			2.97571			42			24			0.937427			0.527303
	2.8			3.386			27			45			1.02447			0.20258
	1.81714			3.175			9			42			1.70746			1.71429
	2.01			2.31937			24			30			0.618217			0.833874
	1.3475			1.89938			21			60			0.761905			0.664011
	3.77			1.206			28			8			0.62069			0.508604
	1.16727			1.6025			48			32			0.75			0.277958
	1.481			2.0025			12			32			0.796813			0.676539
	1.524			2.13			44			40			0.78375			0.654545
	1.61786			2.175			60			24			0.398406			1.17073
	1.11			1.87038			20			64			1.99203			0.90566
	1.25375			2.005			56			24			1.32802			1.08656
	1.94727			2.2875			40			44			0.735519			1.54222
	2.565			3.67125			48			52			1.12052			0.629063
	2.43187			3.78			44			48			1.38462			0.874551
	1.35			1.8725			12			32			0.369231			0.385555
	1.10538			1.42625			32			16			0.827586			1.19522
	1.1775			2.82311			60			8			0.996016			0.70307
	1.23316			2.34267			52			72						1.6
	1.584			2.29			72			48						0.3
	1.32			1.977			76			50.2						0.827586
	1.86187			2.1792			20			45						0.747012
	1.257			2.28			36			30
	1.36071			2.212			32			20
	0.650199			1.96614			40			25
	1.0498			2.4			28			60
	1.3175			1.99452			100.4			45
	0.590526			1.67903			30.12			60.24
	1.32			3.05285			65.26			25.1
	1.412			1.67036			95			40.16
	1.39733			2.50381			105			40.16
	0.997333			4.74603			30			30.12
	1.28337			1.44764			45			45.18
	1.13307			0.875106			45			30.12
	1.64397			1.45192			40.16			25.1
	1.4511			1.98979			50.2			40.16
	1.0538			2.40153			55.22			65.26
	1.28111			1.00693			110.44			65.26
	0.73507			1.71064			65.26			40.16
	0.742987			1.48202			50.2			50.2
	2.54389			1.2172			105.42			30.12
	1.76915			3.14821			65.26			35.14
	0.926625			1.62683			20.08			30.12
	1.12818			2.62629			50.2			35.14
	2.12431			3.15179			55.22			25.1
	0.982567			2.32032			60.24			45.18
	0.62724			3.38247			15.06			35
	0.882539			1.35458			105.42			50.2
	1.72507			2.60558			55.22			75.3
	1.78714			4.48207			45.18			10.04
	1.07441			1.64251			30.12			30.12
	2.34812			0.970237			20.08			20.08
	2.57525			1.16414			45.18			10.04
	2.02948			1.14143			25.1			130.52
	1.65508			1.66375			15.06			85.34
	0.621514			2.14798			25.1			75.3
	0.955472			2.18486			65			40.16
	1.21647			2.24821			65.26			25.1
	1.40289			3.033			85.34			35.14
	1.28008			1.182			45.18			50.2
	2.77888			2.404			40.16			50.2
	1.22773			4.602			50.2			20
	1.21614			2.1936			30.12			40
	1.62948			2.742			125.5			15
	0.802291			1.8345			40.16			20
	0.879482			1.89138			30.12			50
	0.942231			1.03745			40.16			20
	1.605			0.963			60.24			40
	1.3024			2.11753			60.24			65
	0.9135			4.37052			20			55
	1.0176			1.45134			75			60
	0.754667			2.68685			40			30.12
	2.248			1.99602			75			30.12
	1.269			1.52988			45			35.14
	1.18909			2.62607			15			25.1
	1.4712			2.70568			60			20.08
	3.168			3.73625			55			60.24
	1.254			2.21355			50			35.14
	1.37554			2.39283			10			40.16
	0.876992			1.44887			40			25.1
	0.573705			2.48776			115.46			25.1
	1.25896			1.33147			40.16			50.2
	1.17849			1.64143			100.4			45.18
	0.81452			2.50398			45.18			35.14
	1.21753			3.50199			50.2			75.3
	0.938911			2.23805			135.54			60.24
	2.14183			2.20817			75.3			50.2
	1.14542			2.63745			135.54			10.04
	3.08845			1.47849			25.1			20.08
	1.44109			1.34075			60.24			20.08
	1.69057			2.7251			25.1			30.12
	0.981918			1.96246			35.14			50.2
	0.76494			1.176			45.18			85.34
	0.651938			3.078			65.26			20.08
	0.742364			2.53			40.16			65
	1.16952			2.96133			55.22			45
	2.0332			3.77733			45.18			10
	2.868			2.624			100.4			30
	2.646			2.45237			45.18			45
	2.103						25			45
	1.26171						20			45
	0.9849						20			55.22
	1.307						35
	1.506						200
	0.951053						60
							30
							35.14
