# Supplementary material for: Regulation of microtubule dynamic instability by the carboxy-terminal tail of β-tubulin
Source: Life Sci Alliance. 2018 Apr 19;1(2):e201800054. doi: 10.26508/lsa.201800054 (PMC6022761; doi:10.26508/lsa.201800054)
Supplement: Supplementary file 4 [file LSA-2018-00054_TableS2.xlsx]

## Sheet: Sheet1
Yeast Strain	Genotype	Source
yJM0562	MATa ura3-52 lys2-801 leu2-∆1::LEU2-GFP-Tub1 his3-∆200 trp1-∆63	This Study
yJM0301	MATa tub2-430∆ +331::TRP1 ura3-52 lys2-801 leu2-∆1::LEU2-GFP-Tub1 his3-∆200 trp1-∆63	This Study
yJM0302	MATα tub2-430∆ +331::TRP1 ura3-52 lys2-801 leu2-∆1::LEU2-GFP-Tub1 his3-∆200 trp1-∆63	This Study
yJM1211	MATa tub2-438∆+331::TRP1 leu2-∆1::LEU2-GFP-Tub1 ura3-52 lys2-801 his3-∆200 trp1-∆63	This Study
yJM1212	MATa tub2-438∆+331::TRP1 leu2-∆1::LEU2-GFP-Tub1 ura3-52 lys2-801 his3-∆200 trp1-∆63	This Study
yJM2025	MATa tub2-(polyQ)-438∆+331::TRP ura3-52 lys2-801 leu2-∆1::LEU2-GFP-Tub1 his3-∆200 trp1-∆63	This Study
yJM2026	MATa tub2-(polyQ)-438∆+331::TRP ura3-52 lys2-801 leu2-∆1::LEU2-GFP-Tub1 his3-∆200 trp1-∆63	This Study
yJM1221	MATα tub2-(polyQ)::TRP1 ura3-52 lys2-801 leu2-∆1::LEU2-GFP-Tub1 his3-∆200 trp1-∆63	This Study
yJM1902	MATα tub2-423^TUBB3+331::TRP ura3-52 lys2-801 leu2-∆1::LEU2-GFP-Tub1 his3-∆200 trp1-∆63	This Study
yJM1903	MATα tub2-423^TUBB3+331::TRP ura3-52 lys2-801 leu2-∆1::LEU2-GFP-Tub1 his3-∆200 trp1-∆63	This Study
yJM2027	MATa tub2-429^TUBB+331::TRP ura3-52 lys2-801 leu2-∆1::LEU2-GFP-Tub1 his3-∆200 trp1-∆63	This Study
yJM2028	MATα tub2-429^TUBB+331::TRP ura3-52 lys2-801 leu2-∆1::LEU2-GFP-Tub1 his3-∆200 trp1-∆63	This Study
yJM2676	MATα tub1::tub2-CTT+280::KanMX6 tub2::tub1-CTT+331::TRP1 ura3-52 lys2-801 leu2-∆1::LEU2-GFP-Tub1 his3-∆200 trp1-∆63	This Study
yJM2677	MATα tub1::tub2-CTT+280::KanMX6 tub2::tub1-CTT+331::TRP1 ura3-52 lys2-801 leu2-∆1::LEU2-GFP-Tub1 his3-∆200 trp1-∆63	This Study
yJM2914	MATα tub2-430∆ +331::TRP1 mnr2∆::HIS3MX ura3-52 lys2-801 leu2-∆1::LEU2-GFP-Tub1 his3-∆200 trp1-∆63	This Study
yJM2915	MATa tub2-430∆ +331::TRP1 mnr2∆::HIS3MX ura3-52 lys2-801 leu2-∆1::LEU2-GFP-Tub1 his3-∆200 trp1-∆63	This Study
yJM2919	MATα mnr2∆::HIS3MX ura3-52 lys2-801 leu2-∆1::LEU2-GFP-Tub1 his3-∆200 trp1-∆63	This Study
yJM2920	MATa mnr2∆::HIS3MX ura3-52 lys2-801 leu2-∆1::LEU2-GFP-Tub1 his3-∆200 trp1-∆63	This Study
yJM1838	MATα ura3-52 lys2-801 leu2-∆1 his3-∆200 trp1-∆63	This Study
yJM2906	MATa ura3-52 lys2-801 leu2-∆1 his3-∆200 trp1-∆63	This Study
yJM2913	MATa mnr2∆::HIS3MX ura3-52 lys2-801 leu2-∆1 his3-∆200 trp1-∆63	This Study
yJM2916	MATα tub2-430∆ +331::TRP1 mnr2∆::HIS3MX ura3-52 lys2-801 leu2-∆1 his3-∆200 trp1-∆63	This Study
yJM2917	MATa tub2-430∆ +331::TRP1 mnr2∆::HIS3MX ura3-52 lys2-801 leu2-∆1 his3-∆200 trp1-∆63	This Study
yJM0282	MATa tub2-430∆ +331::TRP1 ura3-52 lys2-801 leu2-∆1 his3-∆200 trp1-∆63	Aiken et al. 2014
yJM2922	MATa tub2-430∆ +331::TRP1 mnr2∆::HIS3MX ura3-52 lys2-801 leu2-∆1 his3-∆200 trp1-∆63	This Study
yJM2921	MATα mnr2∆::HIS3MX ura3-52 lys2-801 leu2-∆1 his3-∆200 trp1-∆63	This Study
yJM2905	MATα tub2-430∆+331::TRP1 ura3-52lys2-801leu2-∆1his3-∆200trp1-∆63	This Study
yJM2902	MATa tub2-430∆ +331::TRP1 ura3-52 lys2-801 leu2-∆1 his3-∆200 trp1-∆63	This Study
yJM2918	MATa tub2-430∆ +331::TRP1 ura3-52 lys2-801 leu2-∆1 his3-∆200 trp1-∆63	This Study
yJM1837	MATa ura3-52 lys2-801 leu2-∆1 his3-∆200 trp1-∆63	This Study
yJM2912	MATα ura3-52 lys2-801 leu2-∆1 his3-∆200 trp1-∆63	This Study
yJM1931	MATα mnr2∆::HIS3MX ura3-52 lys2-801 leu2-∆1 his3-∆200 trp1-∆63	This Study
yJM1177	MATa tub2-430∆::hygB ura3-52 lys2-801 leu2-∆1 his3-∆200 trp1-∆63	This Study
yJM1933	MATa mnr2∆::HIS3MX ura3-52 lys2-801 leu2-∆1 his3-∆200 trp1-∆63	This Study
